# Supplementary material
Source: PubMed Central journal article supplement (PMC7087404)
Supplement: Supp_Fig1.pdf [file Supp_Fig1.pdf]

## Supplementary Data

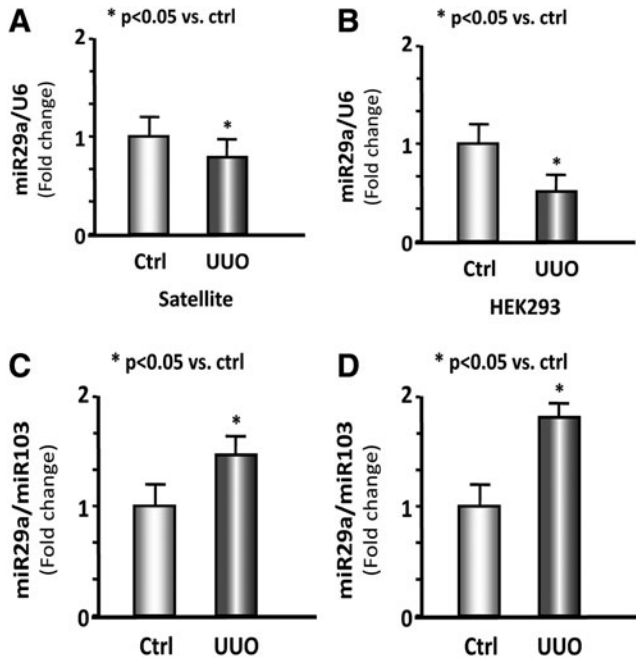

**Supplementary Figure S1.** The evidence for muscle and kidney release of miR-29 by uremic serum. **(A, B)** Cultured satellite cells **(A)** or HEK293 kidney cells **(B)** were treated with 2% pool UUO mice serum and normal mice serum in DMEM for 24 h. Medium was replaced with 5% extracellular-free medium. Total RNA was extracted from the cells after 48 h. The expression of miR-29a-3p was assayed by real-time qPCR. The bar graph shows microRNA from UUO treated group compared with levels in normal mice (represented by onefold). Results are normalized to U6 ( $n=9$ /group). **(C, D)** Cultured satellite cells **(C)** or HEK293 kidney cells **(D)** were treated with 2% UUO mice pool serum and control with normal mice serum in DMEM. Medium was replaced with 2% extracellular-free medium. Total RNA was extracted from exosomes of conditional medium after 48 h. RNA was isolated from exosomes of conditional medium. The expression of miR-29a-3p was assayed by real-time qPCR. The bar graph shows microRNA from UUO treated group compared with levels in normal mice serum (represented by onefold). Results are normalized to miR-103 ( $n=9$ /group). DMEM, Eagle's minimal essential medium; qPCR, quantitative polymerase chain reaction; UUO, unilateral ureteral obstruction.
