# Supplementary material
Source: PubMed Central journal article supplement (PMC7087404)
Supplement: Supp_Table1.pdf [file Supp_Table1.pdf]

| ID                    | baseMean | log2FoldChange<br>(UUO-7D/control) | lfcSE<br>(UUO-7D/control) | stat<br>(UUO-7D/control) | pvalue<br>(UUO-7D/control) |
|-----------------------|----------|------------------------------------|---------------------------|--------------------------|----------------------------|
| mmu-miR-8114          | 190.478  | -1.28597                           | 0.265659                  | -4.84066                 | 1.29E-06                   |
| mmu-miR-103-3p        | 746.595  | -0.895218                          | 0.233984                  | -3.82598                 | 0.000130252                |
| mmu-miR-2137          | 305.317  | 1.43864                            | 0.387539                  | 3.71225                  | 0.000205424                |
| mmu-miR-5126          | 280.606  | 1.32109                            | 0.374519                  | 3.52742                  | 0.000419627                |
| mmu-miR-7058-3p       | 45.6942  | 1.29691                            | 0.373514                  | 3.47219                  | 0.000516239                |
| mmu-miR-465b-5p       | 9.47571  | 2.47269                            | 0.718409                  | 3.4419                   | 0.000577635                |
| mmu-miR-7232-5p       | 9.5037   | -2.26689                           | 0.740434                  | -3.06157                 | 0.00220179                 |
| mmu-miR-10a-5p        | 3750.13  | 1.00164                            | 0.332154                  | 3.01559                  | 0.00256483                 |
| mmu-miR-21a-5p        | 10769.5  | 0.500367                           | 0.174325                  | 2.8703                   | 0.00410077                 |
| mmu-let-7a-1-3p       | 560.813  | 0.897928                           | 0.31409                   | 2.85882                  | 0.0042522                  |
| mmu-miR-434-3p        | 338.861  | 0.759364                           | 0.26973                   | 2.81527                  | 0.00487361                 |
| mmu-miR-6240          | 38.7672  | -1.7217                            | 0.614138                  | -2.80344                 | 0.00505613                 |
| mmu-miR-106b-3p       | 1796.03  | -0.804624                          | 0.29228                   | -2.75292                 | 0.00590656                 |
| mmu-miR-93-5p         | 8572.59  | -0.548861                          | 0.204043                  | -2.68993                 | 0.00714671                 |
| mmu-miR-871-5p        | 4.62109  | 1.78714                            | 0.688235                  | 2.5967                   | 0.00941232                 |
| mmu-miR-222-3p        | 1582.22  | -0.673378                          | 0.259574                  | -2.59417                 | 0.00948201                 |
| mmu-let-7c-5p         | 16593.5  | -0.670595                          | 0.26495                   | -2.53103                 | 0.0113729                  |
| mmu-miR-484           | 2449.79  | -0.496323                          | 0.197229                  | -2.51648                 | 0.0118534                  |
| mmu-miR-215-5p        | 2983.18  | -0.691004                          | 0.275665                  | -2.50668                 | 0.0121872                  |
| mmu-miR-181b-5p       | 304.676  | -0.549147                          | 0.220074                  | -2.49529                 | 0.0125856                  |
| mmu-miR-148a-3p       | 850.491  | 0.597608                           | 0.250184                  | 2.38867                  | 0.0169095                  |
| mmu-miR-149-5p        | 205.237  | -0.82604                           | 0.345936                  | -2.38784                 | 0.0169476                  |
| mmu-miR-652-3p        | 307.221  | -0.69898                           | 0.293459                  | -2.38186                 | 0.0172252                  |
| mmu-miR-7647-5p       | 2.1046   | -1.56879                           | 0.66657                   | -2.35353                 | 0.0185961                  |
| mmu-miR-365-3p        | 8.59351  | 1.73593                            | 0.739366                  | 2.34787                  | 0.0188811                  |
| mmu-miR-92a-3p        | 38737.5  | -0.423065                          | 0.182283                  | -2.32092                 | 0.0202912                  |
| mmu-miR-664-3p        | 64.1395  | -0.890768                          | 0.385081                  | -2.3132                  | 0.0207118                  |
| mmu-miR-7058-5p       | 1.55066  | -1.41099                           | 0.611129                  | -2.30882                 | 0.0209537                  |
| mmu-miR-130b-3p       | 255.469  | -0.780223                          | 0.342619                  | -2.27723                 | 0.0227723                  |
| mmu-miR-744-5p        | 1926.67  | -0.508564                          | 0.225002                  | -2.26026                 | 0.0238052                  |
| mmu-miR-6959-3p       | 75.6661  | 1.47813                            | 0.65687                   | 2.25026                  | 0.0244325                  |
| mmu-miR-421-3p        | 543.879  | -0.615785                          | 0.274809                  | -2.24077                 | 0.0250408                  |
| <b>mmu-miR-29a-3p</b> | 2009.75  | 0.461064                           | 0.205964                  | 2.23857                  | 0.0251838                  |
| mmu-miR-669f-3p       | 1.69637  | -1.39315                           | 0.628974                  | -2.21496                 | 0.0267628                  |
| mmu-miR-223-3p        | 1621.53  | 0.491397                           | 0.229372                  | 2.14236                  | 0.0321649                  |
| mmu-miR-206-3p        | 655.654  | 0.899817                           | 0.429805                  | 2.09355                  | 0.0363002                  |
| mmu-miR-181d-5p       | 265.613  | -0.562204                          | 0.268717                  | -2.09217                 | 0.0364229                  |
| mmu-miR-211-5p        | 11.5093  | -1.52525                           | 0.729909                  | -2.08965                 | 0.0366497                  |
| mmu-miR-3102-3p       | 5.49174  | -1.48112                           | 0.719098                  | -2.0597                  | 0.0394277                  |
| mmu-miR-344d-3p       | 17.0017  | 1.49616                            | 0.740303                  | 2.02101                  | 0.0432786                  |
| mmu-miR-127-5p        | 1.22991  | -1.15607                           | 0.572325                  | -2.01996                 | 0.0433876                  |
| mmu-miR-202-3p        | 6.36067  | 1.33128                            | 0.664838                  | 2.00241                  | 0.0452411                  |
| mmu-miR-6931-5p       | 6.62633  | 1.41215                            | 0.716092                  | 1.97202                  | 0.048607                   |
| mmu-miR-23a-5p        | 2.0928   | 1.40282                            | 0.720949                  | 1.94579                  | 0.05168                    |
| mmu-miR-6926-5p       | 2.75627  | 1.25531                            | 0.650886                  | 1.92862                  | 0.0537785                  |
| mmu-miR-17-5p         | 584.605  | -0.402945                          | 0.209888                  | -1.91981                 | 0.0548819                  |

|                         |                |                  |                 |                 |                  |
|-------------------------|----------------|------------------|-----------------|-----------------|------------------|
| mmu-miR-362-3p          | 34.1783        | 1.2115           | 0.631701        | 1.91784         | 0.0551309        |
| mmu-miR-7089-5p         | 3.36917        | 1.34934          | 0.707369        | 1.90755         | 0.0564499        |
| mmu-miR-22-3p           | 11272.7        | 0.384175         | 0.20202         | 1.90166         | 0.0572151        |
| mmu-miR-134-5p          | 47.3256        | 0.87384          | 0.461217        | 1.89464         | 0.0581402        |
| mmu-miR-503-3p          | 7.96062        | -1.39233         | 0.736873        | -1.88951        | 0.0588232        |
| mmu-miR-878-5p          | 1.74144        | 1.00374          | 0.535302        | 1.8751          | 0.0607796        |
| mmu-miR-3074-2-3p       | 3.95629        | 1.35925          | 0.737957        | 1.84191         | 0.0654886        |
| mmu-miR-874-3p          | 8.28351        | -1.3394          | 0.73095         | -1.83241        | 0.06689          |
| mmu-miR-7013-3p         | 1.20896        | 1.06934          | 0.586555        | 1.82309         | 0.0682894        |
| mmu-miR-146b-5p         | 432.986        | 0.582324         | 0.321701        | 1.81014         | 0.070274         |
| mmu-miR-7007-5p         | 4.98008        | 1.30764          | 0.724556        | 1.80474         | 0.0711152        |
| mmu-let-7b-5p           | 15272.9        | -0.418205        | 0.231795        | -1.8042         | 0.0711996        |
| mmu-miR-669a-5p         | 35.5616        | 0.94954          | 0.529358        | 1.79376         | 0.0728519        |
| mmu-miR-200c-3p         | 201.603        | -0.56482         | 0.315064        | -1.79272        | 0.0730182        |
| mmu-miR-5100            | 10.9615        | 1.30788          | 0.741116        | 1.76474         | 0.0776069        |
| mmu-miR-299a-5p         | 13.1365        | 1.25926          | 0.719287        | 1.75071         | 0.0799963        |
| mmu-miR-199a-3p         | 1688.11        | 0.483911         | 0.276439        | 1.75052         | 0.0800291        |
| mmu-miR-486a-3p         | 1952.28        | -0.459303        | 0.263489        | -1.74316        | 0.0813065        |
| mmu-miR-3064-5p         | 4.12979        | -1.26396         | 0.726017        | -1.74095        | 0.0816929        |
| mmu-miR-541-5p          | 110.881        | 0.651856         | 0.376664        | 1.7306          | 0.0835224        |
| mmu-miR-466g            | 19.2203        | -1.26581         | 0.739573        | -1.71154        | 0.0869813        |
| mmu-miR-7061-5p         | 2.08535        | -1.17592         | 0.689643        | -1.70511        | 0.088173         |
| mmu-miR-8109            | 1.54161        | -0.866912        | 0.509165        | -1.70261        | 0.0886403        |
| mmu-miR-27b-3p          | 2853.36        | 0.391649         | 0.231754        | 1.68993         | 0.0910409        |
| <b>mmu-miR-29b-2-5p</b> | <b>1.48431</b> | <b>-0.962252</b> | <b>0.569882</b> | <b>-1.68851</b> | <b>0.0913129</b> |
| mmu-miR-18a-5p          | 47.9648        | -1.11152         | 0.658868        | -1.68702        | 0.0916001        |
| mmu-miR-26b-5p          | 2316.67        | -0.423981        | 0.252595        | -1.6785         | 0.0932498        |
| mmu-miR-19b-3p          | 916.506        | 0.323203         | 0.192838        | 1.67603         | 0.0937315        |
| mmu-let-7e-5p           | 210.912        | 0.569559         | 0.345163        | 1.65012         | 0.0989194        |
| mmu-miR-1934-5p         | 9.6609         | -1.20903         | 0.738275        | -1.63764        | 0.101497         |
| mmu-miR-3473g           | 0.943736       | -0.907355        | 0.554942        | -1.63505        | 0.102039         |
| mmu-miR-34b-3p          | 32.5843        | 1.1051           | 0.67876         | 1.62811         | 0.103502         |
| mmu-miR-5114            | 8.90503        | 1.19765          | 0.740763        | 1.61678         | 0.105925         |
| mmu-miR-19a-3p          | 288.26         | 0.542262         | 0.336073        | 1.61352         | 0.106631         |
| <b>mmu-miR-291a-3p</b>  | <b>1.39754</b> | <b>-0.794014</b> | <b>0.492461</b> | <b>-1.61234</b> | <b>0.106888</b>  |
| mmu-miR-146a-5p         | 1066.67        | 0.498835         | 0.309624        | 1.6111          | 0.107158         |
| mmu-miR-10b-5p          | 3593.49        | 0.689756         | 0.428632        | 1.6092          | 0.107572         |
| mmu-miR-23a-3p          | 1040.41        | -0.65847         | 0.410595        | -1.6037         | 0.108781         |
| mmu-miR-350-3p          | 16.6362        | -1.04908         | 0.654283        | -1.6034         | 0.108847         |
| mmu-let-7g-5p           | 9392.16        | -0.353927        | 0.222425        | -1.59122        | 0.11156          |
| mmu-miR-25-3p           | 44531.9        | -0.325633        | 0.205997        | -1.58076        | 0.113932         |
| mmu-miR-5106            | 920.643        | 1.04436          | 0.66121         | 1.57947         | 0.114229         |
| mmu-miR-7011-5p         | 3.91521        | -1.15296         | 0.73381         | -1.57119        | 0.116138         |
| mmu-miR-7046-5p         | 0.843869       | 0.760614         | 0.485187        | 1.56767         | 0.116958         |
| mmu-miR-3105-3p         | 3.07258        | -0.95844         | 0.611392        | -1.56764        | 0.116966         |
| mmu-miR-10a-3p          | 14.7811        | 1.03801          | 0.662418        | 1.567           | 0.117115         |
| mmu-miR-669m-3p         | 0.917556       | -0.857011        | 0.547416        | -1.56556        | 0.117452         |
| mmu-miR-666-3p          | 1.23812        | 0.814092         | 0.520361        | 1.56448         | 0.117706         |

|                       |                |                 |                 |                |                |
|-----------------------|----------------|-----------------|-----------------|----------------|----------------|
| mmu-miR-7041-3p       | 0.941254       | -0.849729       | 0.54453         | -1.56048       | 0.118646       |
| mmu-miR-455-3p        | 23.3118        | -0.92462        | 0.597299        | -1.548         | 0.121622       |
| mmu-miR-142a-5p       | 763.51         | -0.287649       | 0.188466        | -1.52626       | 0.126944       |
| mmu-miR-6540-5p       | 3.39094        | -0.982109       | 0.646494        | -1.51913       | 0.128729       |
| mmu-miR-26a-5p        | 1523.22        | -0.406782       | 0.268049        | -1.51757       | 0.129123       |
| mmu-miR-193b-5p       | 3.76812        | -1.03661        | 0.683528        | -1.51656       | 0.129378       |
| mmu-miR-138-1-3p      | 2.59536        | 0.93172         | 0.61462         | 1.51593        | 0.129538       |
| mmu-miR-296-5p        | 167.021        | 0.446561        | 0.295921        | 1.50906        | 0.131285       |
| mmu-let-7i-5p         | 10468.6        | -0.260976       | 0.173318        | -1.50576       | 0.132128       |
| mmu-miR-6943-3p       | 2.03655        | -0.936577       | 0.630261        | -1.48601       | 0.137275       |
| <b>mmu-miR-29c-3p</b> | <b>126.775</b> | <b>0.529426</b> | <b>0.357246</b> | <b>1.48196</b> | <b>0.13835</b> |
| mmu-miR-490-5p        | 4.34375        | -1.07688        | 0.727356        | -1.48054       | 0.138729       |
| mmu-miR-3074-1-3p     | 12.1139        | 1.09546         | 0.740904        | 1.47854        | 0.139264       |
| mmu-miR-5134-3p       | 1.00406        | 0.682048        | 0.462255        | 1.47548        | 0.140083       |
| mmu-miR-1895          | 4.15311        | -1.06795        | 0.724926        | -1.47318       | 0.140702       |
| mmu-miR-877-3p        | 67.3362        | 0.614573        | 0.41815         | 1.46974        | 0.141632       |
| mmu-miR-1191a         | 14.9508        | 1.08635         | 0.739436        | 1.46917        | 0.141788       |
| mmu-miR-1954          | 1.1539         | -0.677216       | 0.462693        | -1.46364       | 0.143293       |
| mmu-miR-125b-5p       | 420.066        | 0.432218        | 0.296948        | 1.45554        | 0.145521       |
| mmu-miR-7044-3p       | 2.58202        | -1.05146        | 0.723823        | -1.45265       | 0.146322       |
| mmu-miR-144-5p        | 135.387        | -0.431649       | 0.297747        | -1.44972       | 0.147137       |
| mmu-miR-669f-5p       | 0.95412        | -0.663017       | 0.46027         | -1.4405        | 0.149727       |
| mmu-miR-186-5p        | 987.623        | -0.393633       | 0.27419         | -1.43562       | 0.151111       |
| mmu-miR-7231-3p       | 6.4011         | 0.991965        | 0.691216        | 1.4351         | 0.151258       |
| mmu-miR-669b-5p       | 2.99001        | 0.963243        | 0.674836        | 1.42737        | 0.153472       |
| mmu-miR-7094-3p       | 3.74359        | 0.976951        | 0.688647        | 1.41865        | 0.156          |
| mmu-miR-499-5p        | 11.8906        | 1.04428         | 0.738193        | 1.41464        | 0.157175       |
| mmu-miR-6371          | 8.24423        | -0.970365       | 0.686188        | -1.41414       | 0.157321       |
| mmu-let-7d-5p         | 3304.34        | -0.274484       | 0.195266        | -1.40569       | 0.159815       |
| mmu-miR-6900-3p       | 2.52047        | 0.978049        | 0.696022        | 1.4052         | 0.159962       |
| mmu-miR-28a-5p        | 20.1506        | -0.936511       | 0.66818         | -1.40159       | 0.161039       |
| mmu-miR-6948-5p       | 0.680996       | -0.636162       | 0.455474        | -1.3967        | 0.162503       |
| mmu-miR-3071-5p       | 0.665335       | -0.632559       | 0.454809        | -1.39082       | 0.164279       |
| mmu-miR-195a-3p       | 30.0287        | 0.93365         | 0.67502         | 1.38314        | 0.16662        |
| mmu-miR-190a-5p       | 0.504356       | 0.61998         | 0.449548        | 1.37912        | 0.167858       |
| mmu-miR-615-3p        | 7.86693        | 1.02188         | 0.741062        | 1.37894        | 0.167913       |
| mmu-miR-669k-5p       | 0.601819       | -0.623658       | 0.453142        | -1.3763        | 0.168729       |
| mmu-miR-1981-5p       | 113.973        | -0.523704       | 0.380755        | -1.37544       | 0.168996       |
| mmu-miR-122-3p        | 2.16442        | 0.899284        | 0.655789        | 1.3713         | 0.170281       |
| mmu-miR-128-3p        | 4237.13        | -0.229015       | 0.167023        | -1.37116       | 0.170326       |
| mmu-miR-6957-5p       | 0.583954       | -0.620355       | 0.452515        | -1.37091       | 0.170405       |
| mmu-miR-149-3p        | 1.16304        | 0.734285        | 0.537638        | 1.36576        | 0.172014       |
| mmu-miR-22-5p         | 25.0656        | 0.930476        | 0.681831        | 1.36467        | 0.172356       |
| mmu-miR-7683-3p       | 1.02506        | -0.658996       | 0.484891        | -1.35906       | 0.174127       |
| mmu-miR-351-5p        | 131.639        | -0.405434       | 0.299191        | -1.3551        | 0.175387       |
| mmu-miR-342-3p        | 246.416        | 0.44726         | 0.330123        | 1.35483        | 0.175473       |
| mmu-miR-7079-5p       | 0.510701       | -0.607114       | 0.449953        | -1.34928       | 0.177246       |
| mmu-miR-298-5p        | 125.443        | 0.482755        | 0.358355        | 1.34714        | 0.177935       |

|                  |          |           |          |          |          |
|------------------|----------|-----------|----------|----------|----------|
| mmu-miR-673-3p   | 2.76063  | 0.842395  | 0.627647 | 1.34215  | 0.179548 |
| mmu-miR-6369     | 0.361825 | 0.595711  | 0.44399  | 1.34172  | 0.179687 |
| mmu-miR-6923-5p  | 0.484982 | -0.601258 | 0.448795 | -1.33972 | 0.180337 |
| mmu-miR-20a-5p   | 696.534  | -0.287359 | 0.214604 | -1.33902 | 0.180565 |
| mmu-miR-6910-5p  | 0.473042 | -0.600637 | 0.448671 | -1.3387  | 0.180668 |
| mmu-miR-1843b-5p | 37.7324  | 0.869586  | 0.649896 | 1.33804  | 0.180884 |
| mmu-miR-3094-3p  | 2.7143   | -0.915998 | 0.68615  | -1.33498 | 0.181883 |
| mmu-miR-7212-5p  | 6.15539  | 0.983579  | 0.740703 | 1.3279   | 0.184211 |
| mmu-miR-127-3p   | 142.271  | 0.525853  | 0.396157 | 1.32739  | 0.184381 |
| mmu-miR-6955-5p  | 0.437449 | -0.591029 | 0.446734 | -1.323   | 0.185836 |
| mmu-miR-7045-5p  | 8.93486  | 0.962736  | 0.727885 | 1.32265  | 0.185952 |
| mmu-miR-337-5p   | 6.46861  | 0.975116  | 0.739165 | 1.31921  | 0.187098 |
| mmu-miR-592-5p   | 2.20879  | -0.742831 | 0.565491 | -1.3136  | 0.188979 |
| mmu-miR-8097     | 2.21818  | -0.850602 | 0.648358 | -1.31193 | 0.189543 |
| mmu-miR-6965-3p  | 0.389915 | -0.579492 | 0.444351 | -1.30413 | 0.192189 |
| mmu-let-7c-1-3p  | 13.1612  | 0.956688  | 0.736892 | 1.29827  | 0.194193 |
| mmu-miR-30e-5p   | 5812.08  | -0.250972 | 0.193974 | -1.29385 | 0.195718 |
| mmu-miR-382-5p   | 73.0811  | 0.506593  | 0.391553 | 1.2938   | 0.195734 |
| mmu-miR-5622-3p  | 10.3164  | 0.928698  | 0.722157 | 1.286    | 0.198441 |
| mmu-miR-1899     | 10.8654  | -0.768443 | 0.597576 | -1.28593 | 0.198466 |
| mmu-miR-7665-3p  | 0.292885 | 0.558108  | 0.434671 | 1.28398  | 0.19915  |
| mmu-miR-6983-5p  | 11.6541  | -0.767426 | 0.597912 | -1.28351 | 0.199313 |
| mmu-miR-199a-5p  | 16.2419  | -0.909352 | 0.710356 | -1.28014 | 0.200497 |
| mmu-miR-3968     | 71.5239  | -0.67588  | 0.528655 | -1.27849 | 0.201077 |
| mmu-miR-7012-5p  | 1.18105  | -0.687872 | 0.539264 | -1.27558 | 0.202105 |
| mmu-miR-6420     | 0.263506 | 0.551519  | 0.432946 | 1.27388  | 0.202708 |
| mmu-miR-30d-5p   | 17215    | -0.22868  | 0.179828 | -1.27166 | 0.203495 |
| mmu-miR-128-1-5p | 3.088    | 0.78079   | 0.616306 | 1.26689  | 0.205195 |
| mmu-miR-7053-5p  | 0.328603 | -0.556371 | 0.439376 | -1.26628 | 0.205414 |
| mmu-miR-15a-3p   | 18.5464  | 0.919556  | 0.726365 | 1.26597  | 0.205524 |
| mmu-miR-6238     | 12.0634  | -0.893272 | 0.705731 | -1.26574 | 0.205607 |
| mmu-miR-714      | 2.45963  | 0.7648    | 0.605201 | 1.26371  | 0.206334 |
| mmu-miR-7684-5p  | 0.255053 | 0.541688  | 0.430318 | 1.25881  | 0.208099 |
| mmu-miR-99b-5p   | 302.042  | 0.372211  | 0.296903 | 1.25365  | 0.209971 |
| mmu-miR-192-5p   | 3828.97  | 0.36353   | 0.289986 | 1.25361  | 0.209983 |
| mmu-miR-1839-3p  | 16.9461  | 0.764674  | 0.614272 | 1.24485  | 0.213189 |
| mmu-miR-3065-3p  | 4.74824  | 0.864806  | 0.694938 | 1.24444  | 0.213339 |
| mmu-miR-686      | 0.289336 | -0.542669 | 0.436296 | -1.24381 | 0.21357  |
| mmu-miR-3097-5p  | 2.43755  | -0.913187 | 0.735903 | -1.24091 | 0.21464  |
| mmu-miR-467b-5p  | 2.82586  | -0.806704 | 0.650096 | -1.2409  | 0.214643 |
| mmu-miR-6418-3p  | 5.34826  | -0.893819 | 0.722389 | -1.23731 | 0.215972 |
| mmu-miR-504-3p   | 0.214518 | 0.525022  | 0.4261   | 1.23216  | 0.217891 |
| mmu-miR-1951     | 1.08278  | -0.666199 | 0.54426  | -1.22405 | 0.220935 |
| mmu-miR-6954-3p  | 0.257371 | -0.529683 | 0.433281 | -1.22249 | 0.221521 |
| mmu-miR-6373     | 0.185139 | 0.51809   | 0.424326 | 1.22097  | 0.222096 |
| mmu-miR-24-1-5p  | 2.7366   | -0.794874 | 0.652822 | -1.2176  | 0.223377 |
| mmu-miR-1897-5p  | 1.51343  | -0.85191  | 0.701077 | -1.21514 | 0.224311 |
| mmu-miR-1249-3p  | 99.1467  | -0.683304 | 0.566261 | -1.20669 | 0.22755  |

|                  |          |           |          |          |          |
|------------------|----------|-----------|----------|----------|----------|
| mmu-miR-1843b-3p | 0.894859 | 0.604676  | 0.501325 | 1.20616  | 0.227757 |
| mmu-miR-669c-5p  | 62.4593  | 0.592153  | 0.491767 | 1.20413  | 0.228538 |
| mmu-miR-320-3p   | 15425.5  | 0.24742   | 0.207966 | 1.18971  | 0.234159 |
| mmu-miR-6934-3p  | 0.229632 | -0.509046 | 0.428287 | -1.18856 | 0.234612 |
| mmu-miR-7017-5p  | 0.229632 | -0.509046 | 0.428287 | -1.18856 | 0.234612 |
| mmu-miR-3081-3p  | 1.2629   | 0.724899  | 0.612027 | 1.18442  | 0.236246 |
| mmu-miR-1903     | 4.66754  | 0.874932  | 0.741119 | 1.18056  | 0.237779 |
| mmu-miR-7682-3p  | 8.20065  | 0.812421  | 0.688693 | 1.17966  | 0.238137 |
| mmu-miR-152-3p   | 145.323  | 0.4236    | 0.359716 | 1.1776   | 0.238958 |
| mmu-miR-547-3p   | 0.213787 | -0.500439 | 0.426201 | -1.17419 | 0.240321 |
| mmu-miR-21a-3p   | 14.3944  | 0.868432  | 0.739641 | 1.17413  | 0.240344 |
| mmu-miR-3535     | 24.2136  | -0.809473 | 0.694524 | -1.16551 | 0.243814 |
| mmu-miR-7086-3p  | 0.168233 | 0.483315  | 0.41506  | 1.16445  | 0.244243 |
| mmu-miR-126a-3p  | 528.71   | -0.350401 | 0.30135  | -1.16277 | 0.244923 |
| mmu-miR-125a-3p  | 31.4884  | 0.653828  | 0.564591 | 1.15806  | 0.246841 |
| mmu-miR-466b-3p  | 0.197943 | -0.490921 | 0.423989 | -1.15786 | 0.24692  |
| mmu-miR-467g     | 0.656146 | -0.528056 | 0.456063 | -1.15786 | 0.246922 |
| mmu-miR-221-3p   | 6844.49  | -0.230916 | 0.199457 | -1.15772 | 0.246977 |
| mmu-miR-5124b    | 0.170936 | 0.477088  | 0.413444 | 1.15394  | 0.248526 |
| mmu-miR-667-3p   | 2.64197  | -0.779012 | 0.677596 | -1.14967 | 0.25028  |
| mmu-miR-7017-3p  | 12.4485  | 0.787183  | 0.686189 | 1.14718  | 0.251306 |
| mmu-miR-100-5p   | 53.6775  | 0.552315  | 0.48236  | 1.14503  | 0.252198 |
| mmu-miR-877-5p   | 14.271   | 0.846105  | 0.738952 | 1.14501  | 0.252206 |
| mmu-miR-466n-3p  | 0.182098 | -0.480847 | 0.421591 | -1.14055 | 0.254056 |
| mmu-miR-329-5p   | 2.1006   | -0.751243 | 0.660729 | -1.13699 | 0.255542 |
| mmu-miR-6981-5p  | 23.316   | 0.72012   | 0.635187 | 1.13371  | 0.256915 |
| mmu-miR-7003-5p  | 1.11999  | -0.556944 | 0.492035 | -1.13192 | 0.257668 |
| mmu-miR-3092-5p  | 0.174245 | -0.475796 | 0.420366 | -1.13186 | 0.257692 |
| mmu-miR-181c-3p  | 10.7395  | -0.791179 | 0.699834 | -1.13052 | 0.258255 |
| mmu-miR-6937-5p  | 11.0944  | -0.821253 | 0.727423 | -1.12899 | 0.258902 |
| mmu-miR-500-3p   | 10.3477  | -0.832517 | 0.738168 | -1.12782 | 0.259398 |
| mmu-miR-486b-3p  | 17767.6  | -0.277633 | 0.246318 | -1.12713 | 0.259687 |
| mmu-miR-7078-3p  | 1.09199  | 0.721092  | 0.640839 | 1.12523  | 0.260491 |
| mmu-miR-574-5p   | 217.579  | 0.425812  | 0.378509 | 1.12497  | 0.260601 |
| mmu-miR-3620-3p  | 0.166254 | -0.470189 | 0.418988 | -1.1222  | 0.261777 |
| mmu-miR-6929-3p  | 45.7667  | 0.466989  | 0.416574 | 1.12102  | 0.262278 |
| mmu-miR-297b-3p  | 3.35128  | 0.753337  | 0.672541 | 1.12013  | 0.262656 |
| mmu-miR-191-5p   | 5095.58  | 0.329468  | 0.29452  | 1.11866  | 0.263284 |
| mmu-miR-3098-5p  | 0.575669 | -0.503567 | 0.453901 | -1.10942 | 0.267248 |
| mmu-miR-214-5p   | 9.21273  | 0.785354  | 0.708131 | 1.10905  | 0.267407 |
| mmu-miR-3073b-5p | 0.130401 | 0.450288  | 0.406732 | 1.10709  | 0.268256 |
| mmu-miR-7053-3p  | 1.52084  | -0.644913 | 0.584519 | -1.10332 | 0.269888 |
| mmu-miR-101a-5p  | 1.4208   | 0.736859  | 0.668381 | 1.10245  | 0.270265 |
| mmu-miR-1194     | 5.69649  | -0.690981 | 0.628004 | -1.10028 | 0.271209 |
| mmu-miR-9769-3p  | 3.89347  | -0.76219  | 0.693028 | -1.0998  | 0.271421 |
| mmu-miR-187-3p   | 23.7472  | 0.703584  | 0.641115 | 1.09744  | 0.27245  |
| mmu-miR-7117-3p  | 4.18602  | 0.802926  | 0.734467 | 1.09321  | 0.274302 |
| mmu-miR-693-3p   | 0.156379 | -0.452477 | 0.41574  | -1.08837 | 0.276433 |

|                         |           |           |          |          |          |
|-------------------------|-----------|-----------|----------|----------|----------|
| mmu-miR-200a-5p         | 5.19064   | 0.795122  | 0.737165 | 1.07862  | 0.280756 |
| mmu-miR-381-3p          | 14.4892   | 0.607197  | 0.56415  | 1.0763   | 0.281792 |
| mmu-miR-139-5p          | 186.416   | 0.421068  | 0.391297 | 1.07608  | 0.28189  |
| mmu-miR-329-3p          | 0.845361  | 0.646106  | 0.600443 | 1.07605  | 0.281906 |
| mmu-miR-7071-5p         | 0.148663  | -0.446163 | 0.414679 | -1.07592 | 0.281961 |
| mmu-miR-7118-3p         | 2.92424   | 0.752698  | 0.69963  | 1.07585  | 0.281994 |
| mmu-miR-208b-3p         | 7.12537   | 0.785373  | 0.732302 | 1.07247  | 0.283508 |
| mmu-miR-876-5p          | 0.652352  | 0.487926  | 0.455773 | 1.07055  | 0.284374 |
| mmu-miR-148b-3p         | 236.635   | -0.355637 | 0.333824 | -1.06534 | 0.286721 |
| mmu-miR-16-1-3p         | 5.27462   | 0.769323  | 0.725183 | 1.06087  | 0.28875  |
| mmu-miR-7071-3p         | 0.140672  | -0.438161 | 0.413391 | -1.05992 | 0.289182 |
| mmu-miR-132-5p          | 1.70028   | 0.596338  | 0.562961 | 1.05929  | 0.289469 |
| mmu-miR-1912-3p         | 0.140535  | -0.437483 | 0.413282 | -1.05856 | 0.289801 |
| mmu-miR-7225-3p         | 0.140535  | -0.437483 | 0.413282 | -1.05856 | 0.289801 |
| mmu-miR-30b-5p          | 399.445   | -0.253008 | 0.239271 | -1.05741 | 0.290325 |
| mmu-miR-3074-5p         | 23.8394   | -0.538842 | 0.512949 | -1.05048 | 0.293498 |
| mmu-miR-139-3p          | 11.7537   | 0.749819  | 0.71467  | 1.04918  | 0.294094 |
| <b>mmu-miR-29b-1-5p</b> | 20.2968   | -0.607728 | 0.579835 | -1.04811 | 0.29459  |
| mmu-miR-1905            | 1.47052   | -0.607961 | 0.582086 | -1.04445 | 0.296277 |
| mmu-miR-93-3p           | 46.3075   | -0.509326 | 0.488058 | -1.04358 | 0.296681 |
| mmu-miR-6953-3p         | 0.132681  | -0.429866 | 0.412042 | -1.04326 | 0.296828 |
| mmu-miR-7088-5p         | 1.18773   | 0.692858  | 0.668417 | 1.03657  | 0.299938 |
| mmu-miR-25-5p           | 46.0517   | 0.678008  | 0.656182 | 1.03326  | 0.301481 |
| mmu-miR-341-3p          | 1.08443   | -0.495018 | 0.480693 | -1.0298  | 0.303104 |
| mmu-miR-873a-3p         | 0.0925696 | 0.411027  | 0.399147 | 1.02976  | 0.303121 |
| mmu-miR-6378            | 0.0925696 | 0.411027  | 0.399147 | 1.02976  | 0.303121 |
| mmu-miR-7039-5p         | 0.0925696 | 0.411027  | 0.399147 | 1.02976  | 0.303121 |
| mmu-miR-7012-3p         | 2.30671   | -0.579799 | 0.564358 | -1.02736 | 0.304251 |
| mmu-miR-147-3p          | 2.69445   | 0.760925  | 0.740687 | 1.02732  | 0.304268 |
| mmu-miR-3473d           | 28.304    | -0.702351 | 0.683719 | -1.02725 | 0.304302 |
| mmu-miR-1957b           | 0.406557  | -0.45897  | 0.446861 | -1.0271  | 0.304375 |
| mmu-miR-7059-3p         | 1.21001   | -0.653189 | 0.63641  | -1.02637 | 0.304719 |
| mmu-miR-743a-3p         | 0.12469   | -0.421307 | 0.410622 | -1.02602 | 0.304882 |
| mmu-miR-7672-5p         | 0.12469   | -0.421307 | 0.410622 | -1.02602 | 0.304882 |
| mmu-miR-326-3p          | 134.593   | -0.507973 | 0.498344 | -1.01932 | 0.30805  |
| mmu-miR-6980-5p         | 0.871253  | 0.645675  | 0.634498 | 1.01762  | 0.308861 |
| mmu-miR-7066-5p         | 0.577371  | -0.461308 | 0.453807 | -1.01653 | 0.309377 |
| mmu-miR-7226-3p         | 0.507626  | 0.457839  | 0.451499 | 1.01404  | 0.310563 |
| mmu-miR-671-5p          | 10.5426   | -0.75022  | 0.740092 | -1.01368 | 0.310733 |
| mmu-miR-466i-3p         | 13.7613   | -0.748349 | 0.7403   | -1.01087 | 0.312077 |
| mmu-miR-30c-5p          | 2933.98   | -0.294045 | 0.291479 | -1.0088  | 0.313069 |
| mmu-miR-7670-3p         | 1.83758   | -0.608111 | 0.602923 | -1.00861 | 0.313164 |
| mmu-miR-1187            | 22.2108   | -0.744421 | 0.738177 | -1.00846 | 0.313234 |
| mmu-miR-7052-5p         | 0.73068   | -0.461594 | 0.458173 | -1.00747 | 0.31371  |
| mmu-miR-374c-5p         | 0.866403  | 0.560347  | 0.556417 | 1.00706  | 0.313904 |
| mmu-miR-20b-5p          | 17.5346   | -0.660716 | 0.656167 | -1.00693 | 0.313967 |
| mmu-miR-145a-3p         | 13.7962   | 0.733738  | 0.731006 | 1.00374  | 0.315505 |
| mmu-miR-322-5p          | 14.3277   | -0.727375 | 0.725135 | -1.00309 | 0.315817 |

|                  |           |           |          |           |          |
|------------------|-----------|-----------|----------|-----------|----------|
| mmu-miR-191-3p   | 9.3723    | -0.734221 | 0.73418  | -1.00005  | 0.317284 |
| mmu-miR-7063-5p  | 3.59109   | -0.666219 | 0.666643 | -0.999364 | 0.317619 |
| mmu-miR-3062-5p  | 1.74318   | -0.605706 | 0.607174 | -0.997582 | 0.318482 |
| mmu-miR-6996-3p  | 2.8863    | 0.732763  | 0.737406 | 0.993704  | 0.320367 |
| mmu-miR-7036b-5p | 2.11984   | -0.710902 | 0.715441 | -0.993656 | 0.32039  |
| mmu-miR-669a-3p  | 11.7049   | -0.699161 | 0.705291 | -0.991308 | 0.321535 |
| mmu-miR-721      | 0.423377  | -0.443474 | 0.447462 | -0.991088 | 0.321643 |
| mmu-miR-6978-5p  | 0.412052  | -0.441984 | 0.446894 | -0.989014 | 0.322656 |
| mmu-miR-7054-5p  | 6.44111   | 0.639905  | 0.647068 | 0.98893   | 0.322697 |
| mmu-miR-653-3p   | 3.29327   | 0.729792  | 0.73966  | 0.986659  | 0.32381  |
| mmu-miR-7047-5p  | 2.21873   | -0.61537  | 0.624022 | -0.986136 | 0.324067 |
| mmu-miR-532-5p   | 189.634   | 0.291173  | 0.295407 | 0.985667  | 0.324296 |
| mmu-let-7g-3p    | 1.41325   | -0.504105 | 0.511601 | -0.985348 | 0.324453 |
| mmu-miR-328-3p   | 21565.2   | -0.233409 | 0.236961 | -0.985011 | 0.324619 |
| mmu-miR-6975-5p  | 3.34036   | 0.705189  | 0.720226 | 0.979122  | 0.32752  |
| mmu-miR-431-5p   | 14.7305   | 0.642214  | 0.657242 | 0.977134  | 0.328503 |
| mmu-miR-6967-5p  | 6.94121   | 0.699043  | 0.71923  | 0.971932  | 0.331085 |
| mmu-miR-185-3p   | 44.5769   | -0.510906 | 0.527149 | -0.969186 | 0.332453 |
| mmu-miR-7092-3p  | 35.2749   | 0.462857  | 0.480634 | 0.963013  | 0.335541 |
| mmu-miR-297a-5p  | 0.114816  | -0.390884 | 0.405936 | -0.962921 | 0.335587 |
| mmu-miR-7090-3p  | 0.114816  | -0.390884 | 0.405936 | -0.962921 | 0.335587 |
| mmu-miR-136-5p   | 15.1461   | 0.690739  | 0.718805 | 0.960955  | 0.336575 |
| mmu-miR-205-5p   | 579.502   | -0.324121 | 0.338747 | -0.956821 | 0.338658 |
| mmu-miR-7072-5p  | 0.989021  | 0.482766  | 0.506279 | 0.953558  | 0.340308 |
| mmu-miR-6923-3p  | 6.40178   | 0.702836  | 0.741105 | 0.948361  | 0.342945 |
| mmu-miR-654-3p   | 3.58368   | 0.695597  | 0.735125 | 0.94623   | 0.344032 |
| mmu-miR-18a-3p   | 115.079   | -0.315578 | 0.334817 | -0.94254  | 0.345916 |
| mmu-miR-30f      | 1.18265   | -0.591003 | 0.627511 | -0.941822 | 0.346284 |
| mmu-miR-7233-3p  | 0.106962  | -0.380509 | 0.404366 | -0.941003 | 0.346704 |
| mmu-miR-6337     | 0.620537  | -0.426665 | 0.455926 | -0.935821 | 0.349365 |
| mmu-let-7b-3p    | 117.91    | -0.387357 | 0.416247 | -0.930594 | 0.352063 |
| mmu-miR-1a-1-5p  | 0.124651  | 0.363004  | 0.390165 | 0.930385  | 0.352172 |
| mmu-miR-101b-5p  | 0.124651  | 0.363004  | 0.390165 | 0.930385  | 0.352172 |
| mmu-miR-883b-3p  | 0.124651  | 0.363004  | 0.390165 | 0.930385  | 0.352172 |
| mmu-miR-1933-5p  | 0.124651  | 0.363004  | 0.390165 | 0.930385  | 0.352172 |
| mmu-miR-6357     | 0.124651  | 0.363004  | 0.390165 | 0.930385  | 0.352172 |
| mmu-miR-6980-3p  | 0.124651  | 0.363004  | 0.390165 | 0.930385  | 0.352172 |
| mmu-miR-6989-5p  | 0.124651  | 0.363004  | 0.390165 | 0.930385  | 0.352172 |
| mmu-miR-7081-5p  | 0.124651  | 0.363004  | 0.390165 | 0.930385  | 0.352172 |
| mmu-miR-7091-3p  | 2.38822   | -0.593978 | 0.640365 | -0.927562 | 0.353635 |
| mmu-miR-34b-5p   | 0.0841166 | 0.357728  | 0.389135 | 0.91929   | 0.357944 |
| mmu-miR-489-5p   | 0.0841166 | 0.357728  | 0.389135 | 0.91929   | 0.357944 |
| mmu-miR-302b-5p  | 0.0841166 | 0.357728  | 0.389135 | 0.91929   | 0.357944 |
| mmu-miR-3059-3p  | 0.0841166 | 0.357728  | 0.389135 | 0.91929   | 0.357944 |
| mmu-miR-763      | 0.0841166 | 0.357728  | 0.389135 | 0.91929   | 0.357944 |
| mmu-miR-509-3p   | 0.0841166 | 0.357728  | 0.389135 | 0.91929   | 0.357944 |
| mmu-miR-6964-3p  | 0.0841166 | 0.357728  | 0.389135 | 0.91929   | 0.357944 |
| mmu-miR-7232-3p  | 0.0841166 | 0.357728  | 0.389135 | 0.91929   | 0.357944 |

|                    |           |           |          |           |          |
|--------------------|-----------|-----------|----------|-----------|----------|
| mmu-miR-8090       | 0.0841166 | 0.357728  | 0.389135 | 0.91929   | 0.357944 |
| mmu-miR-346-3p     | 0.099109  | -0.369855 | 0.40272  | -0.918392 | 0.358413 |
| mmu-miR-541-3p     | 0.099109  | -0.369855 | 0.40272  | -0.918392 | 0.358413 |
| mmu-miR-675-5p     | 0.099109  | -0.369855 | 0.40272  | -0.918392 | 0.358413 |
| mmu-miR-1b-3p      | 0.099109  | -0.369855 | 0.40272  | -0.918392 | 0.358413 |
| mmu-miR-7030-5p    | 0.099109  | -0.369855 | 0.40272  | -0.918392 | 0.358413 |
| mmu-miR-7094b-2-5p | 0.099109  | -0.369855 | 0.40272  | -0.918392 | 0.358413 |
| mmu-miR-494-5p     | 0.0989713 | -0.368678 | 0.402536 | -0.915888 | 0.359726 |
| mmu-miR-759        | 0.0989713 | -0.368678 | 0.402536 | -0.915888 | 0.359726 |
| mmu-miR-6356       | 0.0989713 | -0.368678 | 0.402536 | -0.915888 | 0.359726 |
| mmu-miR-6401       | 0.0989713 | -0.368678 | 0.402536 | -0.915888 | 0.359726 |
| mmu-miR-6405       | 0.0989713 | -0.368678 | 0.402536 | -0.915888 | 0.359726 |
| mmu-miR-7062-3p    | 0.0989713 | -0.368678 | 0.402536 | -0.915888 | 0.359726 |
| mmu-miR-126a-5p    | 3343.53   | 0.197741  | 0.21633  | 0.914072  | 0.360679 |
| mmu-miR-6928-5p    | 0.560506  | 0.414209  | 0.453419 | 0.913522  | 0.360968 |
| mmu-miR-222-5p     | 9.09093   | -0.645149 | 0.709401 | -0.909428 | 0.363124 |
| mmu-miR-5623-5p    | 0.365154  | -0.40122  | 0.444089 | -0.903466 | 0.366279 |
| mmu-miR-669e-5p    | 0.365076  | 0.398719  | 0.442    | 0.90208   | 0.367014 |
| mmu-miR-6237       | 6.22828   | 0.605335  | 0.671379 | 0.90163   | 0.367253 |
| mmu-miR-1199-5p    | 1.93009   | 0.505797  | 0.564421 | 0.896134  | 0.370181 |
| mmu-miR-669h-3p    | 0.0911179 | -0.357656 | 0.400814 | -0.892324 | 0.372219 |
| mmu-miR-5134-5p    | 0.0911179 | -0.357656 | 0.400814 | -0.892324 | 0.372219 |
| mmu-miR-5626-3p    | 0.0911179 | -0.357656 | 0.400814 | -0.892324 | 0.372219 |
| mmu-miR-6419       | 0.0911179 | -0.357656 | 0.400814 | -0.892324 | 0.372219 |
| mmu-miR-7068-5p    | 2.58565   | -0.523947 | 0.587477 | -0.89186  | 0.372468 |
| mmu-miR-107-3p     | 5.12821   | 0.657781  | 0.739948 | 0.888956  | 0.374027 |
| mmu-miR-7010-3p    | 1.47243   | 0.597767  | 0.676976 | 0.882997  | 0.377238 |
| mmu-miR-872-5p     | 73.8229   | 0.478307  | 0.54285  | 0.881102  | 0.378262 |
| mmu-miR-291a-5p    | 0.308746  | 0.385133  | 0.437831 | 0.879639  | 0.379055 |
| mmu-miR-3061-5p    | 3.64652   | -0.580128 | 0.6597   | -0.879381 | 0.379195 |
| mmu-miR-382-3p     | 11.7584   | 0.649594  | 0.741022 | 0.876618  | 0.380694 |
| mmu-miR-335-3p     | 46.945    | -0.47908  | 0.54694  | -0.875928 | 0.381069 |
| mmu-miR-141-3p     | 48.6801   | -0.379087 | 0.436245 | -0.868978 | 0.384859 |
| mmu-miR-7084-3p    | 0.393874  | 0.388632  | 0.447264 | 0.868909  | 0.384897 |
| mmu-miR-6919-3p    | 0.53796   | -0.392864 | 0.453609 | -0.866086 | 0.386443 |
| mmu-miR-132-3p     | 83.5765   | 0.338121  | 0.390498 | 0.865872  | 0.386561 |
| mmu-miR-486a-5p    | 445249    | -0.245161 | 0.284398 | -0.862035 | 0.388668 |
| mmu-miR-216a-3p    | 0.0831268 | -0.343907 | 0.399343 | -0.861182 | 0.389138 |
| mmu-miR-883a-3p    | 0.0831268 | -0.343907 | 0.399343 | -0.861182 | 0.389138 |
| mmu-miR-1251-5p    | 0.0831268 | -0.343907 | 0.399343 | -0.861182 | 0.389138 |
| mmu-miR-3093-5p    | 0.0831268 | -0.343907 | 0.399343 | -0.861182 | 0.389138 |
| mmu-miR-344g-5p    | 0.0831268 | -0.343907 | 0.399343 | -0.861182 | 0.389138 |
| mmu-miR-5617-5p    | 0.0831268 | -0.343907 | 0.399343 | -0.861182 | 0.389138 |
| mmu-miR-6370       | 0.0831268 | -0.343907 | 0.399343 | -0.861182 | 0.389138 |
| mmu-miR-6392-3p    | 0.0831268 | -0.343907 | 0.399343 | -0.861182 | 0.389138 |
| mmu-miR-6908-3p    | 0.0831268 | -0.343907 | 0.399343 | -0.861182 | 0.389138 |
| mmu-miR-6955-3p    | 0.0831268 | -0.343907 | 0.399343 | -0.861182 | 0.389138 |
| mmu-miR-7066-3p    | 0.0831268 | -0.343907 | 0.399343 | -0.861182 | 0.389138 |



|                  |           |           |          |           |          |
|------------------|-----------|-----------|----------|-----------|----------|
| mmu-miR-7215-3p  | 0.0831268 | -0.343907 | 0.399343 | -0.861182 | 0.389138 |
| mmu-miR-7230-3p  | 0.0831268 | -0.343907 | 0.399343 | -0.861182 | 0.389138 |
| mmu-miR-8095     | 4.21056   | -0.621998 | 0.723644 | -0.859535 | 0.390045 |
| mmu-miR-429-3p   | 101.782   | 0.334838  | 0.390445 | 0.857582  | 0.391123 |
| mmu-miR-196b-3p  | 1.91459   | 0.469537  | 0.548644 | 0.855813  | 0.392101 |
| mmu-miR-1843a-5p | 123.394   | -0.344216 | 0.402536 | -0.855117 | 0.392486 |
| mmu-miR-7212-3p  | 0.627678  | 0.387809  | 0.455177 | 0.851995  | 0.394217 |
| mmu-miR-491-5p   | 4.4527    | -0.628776 | 0.738247 | -0.851714 | 0.394373 |
| mmu-miR-1843a-3p | 2.19191   | -0.492107 | 0.579043 | -0.849863 | 0.395401 |
| mmu-miR-511-3p   | 9.81113   | 0.606104  | 0.713963 | 0.848928  | 0.395921 |
| mmu-miR-760-3p   | 6.22524   | 0.628245  | 0.740816 | 0.848046  | 0.396413 |
| mmu-let-7i-3p    | 10.7156   | 0.623533  | 0.741011 | 0.841462  | 0.400089 |
| mmu-miR-6975-3p  | 2.04314   | 0.6177    | 0.736608 | 0.838574  | 0.401709 |
| mmu-miR-466d-3p  | 1.78075   | -0.467728 | 0.558578 | -0.837355 | 0.402393 |
| mmu-miR-7a-5p    | 135.933   | 0.298985  | 0.357603 | 0.83608   | 0.40311  |
| mmu-miR-6769b-5p | 0.290067  | -0.365498 | 0.437622 | -0.835191 | 0.40361  |
| mmu-miR-453      | 4.65457   | 0.532944  | 0.640284 | 0.832356  | 0.405208 |
| mmu-miR-7045-3p  | 6.79004   | 0.605125  | 0.728811 | 0.830291  | 0.406374 |
| mmu-miR-5129-5p  | 17.437    | 0.541176  | 0.652326 | 0.82961   | 0.406759 |
| mmu-miR-1941-5p  | 1.40499   | 0.48269   | 0.582327 | 0.828899  | 0.407162 |
| mmu-miR-8110     | 0.901738  | -0.483925 | 0.584546 | -0.827864 | 0.407747 |
| mmu-miR-7028-3p  | 2.0549    | 0.533989  | 0.64691  | 0.825446  | 0.409118 |
| mmu-miR-1894-5p  | 0.495846  | -0.371905 | 0.452137 | -0.822548 | 0.410765 |
| mmu-miR-7046-3p  | 8.06791   | -0.60469  | 0.740086 | -0.817053 | 0.413898 |
| mmu-miR-7050-5p  | 6.1905    | 0.570091  | 0.699136 | 0.815422  | 0.414831 |
| mmu-miR-183-3p   | 0.311647  | -0.359902 | 0.4419   | -0.814442 | 0.415392 |
| mmu-miR-7015-5p  | 0.273564  | 0.35343   | 0.433963 | 0.814424  | 0.415402 |
| mmu-miR-3082-5p  | 1.72838   | -0.500236 | 0.61436  | -0.81424  | 0.415507 |
| mmu-miR-6416-3p  | 0.538965  | -0.369245 | 0.454055 | -0.813217 | 0.416094 |
| mmu-miR-7235-3p  | 12.015    | 0.598226  | 0.735999 | 0.812808  | 0.416328 |
| mmu-miR-8119     | 3.26976   | 0.48722   | 0.603023 | 0.807964  | 0.419111 |
| mmu-miR-432      | 0.778798  | -0.37031  | 0.459046 | -0.806695 | 0.419842 |
| mmu-miR-295-3p   | 0.238832  | 0.347671  | 0.432461 | 0.803935  | 0.421435 |
| mmu-miR-6366     | 0.238832  | 0.347671  | 0.432461 | 0.803935  | 0.421435 |
| mmu-miR-6952-5p  | 5.77189   | 0.585816  | 0.730543 | 0.801891  | 0.422616 |
| mmu-miR-1195     | 14.3813   | 0.556803  | 0.6969   | 0.798972  | 0.424307 |
| mmu-miR-466q     | 3.24376   | 0.538591  | 0.674248 | 0.798801  | 0.424406 |
| mmu-miR-3470a    | 2.63969   | -0.462389 | 0.581155 | -0.795638 | 0.426242 |
| mmu-miR-6244     | 15115     | -0.217946 | 0.273966 | -0.795522 | 0.42631  |
| mmu-miR-7667-5p  | 8.72365   | -0.588994 | 0.740913 | -0.794957 | 0.426638 |
| mmu-miR-467c-3p  | 0.272201  | -0.345713 | 0.435054 | -0.794644 | 0.42682  |
| mmu-miR-27a-3p   | 1662.78   | 0.166777  | 0.210662 | 0.791681  | 0.428547 |
| mmu-miR-344-3p   | 2.82401   | -0.463103 | 0.585528 | -0.790915 | 0.428993 |
| mmu-miR-19b-2-5p | 0.0462848 | 0.300558  | 0.380387 | 0.790137  | 0.429448 |
| mmu-miR-1a-2-5p  | 0.0462848 | 0.300558  | 0.380387 | 0.790137  | 0.429448 |
| mmu-miR-363-5p   | 0.0462848 | 0.300558  | 0.380387 | 0.790137  | 0.429448 |
| mmu-miR-465a-5p  | 0.0462848 | 0.300558  | 0.380387 | 0.790137  | 0.429448 |
| mmu-miR-1264-3p  | 0.0462848 | 0.300558  | 0.380387 | 0.790137  | 0.429448 |

|                  |           |           |          |           |          |
|------------------|-----------|-----------|----------|-----------|----------|
| mmu-miR-742-3p   | 0.0462848 | 0.300558  | 0.380387 | 0.790137  | 0.429448 |
| mmu-miR-1932     | 0.0462848 | 0.300558  | 0.380387 | 0.790137  | 0.429448 |
| mmu-miR-1967     | 0.0462848 | 0.300558  | 0.380387 | 0.790137  | 0.429448 |
| mmu-miR-3088-3p  | 0.0462848 | 0.300558  | 0.380387 | 0.790137  | 0.429448 |
| mmu-miR-3110-3p  | 0.0462848 | 0.300558  | 0.380387 | 0.790137  | 0.429448 |
| mmu-miR-5104     | 0.0462848 | 0.300558  | 0.380387 | 0.790137  | 0.429448 |
| mmu-miR-5615-5p  | 0.0462848 | 0.300558  | 0.380387 | 0.790137  | 0.429448 |
| mmu-miR-6340     | 0.0462848 | 0.300558  | 0.380387 | 0.790137  | 0.429448 |
| mmu-miR-145b     | 0.0462848 | 0.300558  | 0.380387 | 0.790137  | 0.429448 |
| mmu-miR-6372     | 0.0462848 | 0.300558  | 0.380387 | 0.790137  | 0.429448 |
| mmu-miR-6939-5p  | 0.0462848 | 0.300558  | 0.380387 | 0.790137  | 0.429448 |
| mmu-miR-6977-3p  | 0.0462848 | 0.300558  | 0.380387 | 0.790137  | 0.429448 |
| mmu-miR-7001-3p  | 0.0462848 | 0.300558  | 0.380387 | 0.790137  | 0.429448 |
| mmu-miR-7008-5p  | 0.0462848 | 0.300558  | 0.380387 | 0.790137  | 0.429448 |
| mmu-miR-7069-3p  | 0.0462848 | 0.300558  | 0.380387 | 0.790137  | 0.429448 |
| mmu-miR-7679-3p  | 0.0462848 | 0.300558  | 0.380387 | 0.790137  | 0.429448 |
| mmu-miR-7681-5p  | 0.0462848 | 0.300558  | 0.380387 | 0.790137  | 0.429448 |
| mmu-miR-3618-5p  | 0.0462848 | 0.300558  | 0.380387 | 0.790137  | 0.429448 |
| mmu-miR-3103-3p  | 6.57699   | -0.572325 | 0.725425 | -0.788951 | 0.43014  |
| mmu-miR-34c-5p   | 3.2036    | 0.54692   | 0.696248 | 0.785525  | 0.432146 |
| mmu-miR-598-3p   | 1.01988   | -0.442097 | 0.567006 | -0.779704 | 0.435565 |
| mmu-miR-676-5p   | 16.8965   | 0.547893  | 0.702842 | 0.77954   | 0.435662 |
| mmu-miR-7013-5p  | 0.556211  | -0.391766 | 0.504206 | -0.776996 | 0.437161 |
| mmu-miR-6982-5p  | 0.266998  | -0.337098 | 0.434516 | -0.775801 | 0.437866 |
| mmu-miR-6911-5p  | 0.518586  | -0.349658 | 0.451591 | -0.774282 | 0.438764 |
| mmu-miR-217-5p   | 33.7073   | 0.554642  | 0.71726  | 0.773278  | 0.439358 |
| mmu-miR-7086-5p  | 3.22019   | -0.569507 | 0.74037  | -0.76922  | 0.441763 |
| mmu-miR-7677-3p  | 0.449335  | -0.344788 | 0.449077 | -0.76777  | 0.442624 |
| mmu-miR-1231-3p  | 1.77191   | -0.414547 | 0.540772 | -0.766584 | 0.443329 |
| mmu-miR-129-1-3p | 0.555932  | 0.348705  | 0.455001 | 0.766382  | 0.443449 |
| mmu-miR-6927-5p  | 5.33467   | 0.536863  | 0.702989 | 0.763686  | 0.445054 |
| mmu-miR-1955-3p  | 0.960744  | 0.377089  | 0.496383 | 0.759672  | 0.44745  |
| mmu-miR-7011-3p  | 1.48739   | 0.447397  | 0.58912  | 0.759433  | 0.447594 |
| mmu-miR-3097-3p  | 2.64273   | 0.396009  | 0.522134 | 0.758443  | 0.448186 |
| mmu-miR-129-2-3p | 1.00825   | 0.351151  | 0.463025 | 0.758384  | 0.448221 |
| mmu-miR-200b-3p  | 38.4572   | 0.461561  | 0.609788 | 0.756921  | 0.449097 |
| mmu-miR-375-3p   | 136.767   | -0.549345 | 0.726806 | -0.755834 | 0.449748 |
| mmu-miR-5107-5p  | 18.7191   | 0.558671  | 0.740527 | 0.754423  | 0.450595 |
| mmu-miR-338-5p   | 20.3166   | 0.537367  | 0.714425 | 0.752167  | 0.45195  |
| mmu-miR-340-5p   | 75.8162   | -0.336001 | 0.44964  | -0.747266 | 0.454903 |
| mmu-miR-133a-3p  | 9297.89   | 0.26057   | 0.349805 | 0.744901  | 0.456332 |
| mmu-miR-196a-5p  | 23.688    | 0.488257  | 0.657281 | 0.742844  | 0.457576 |
| mmu-miR-7042-5p  | 3.95068   | -0.496536 | 0.66851  | -0.742751 | 0.457632 |
| mmu-miR-7687-3p  | 1.6715    | -0.39962  | 0.540154 | -0.739826 | 0.459405 |
| mmu-miR-296-3p   | 74.4309   | 0.256591  | 0.348185 | 0.736939  | 0.461159 |
| mmu-miR-143-3p   | 2465.06   | -0.172933 | 0.234695 | -0.736841 | 0.461219 |
| mmu-miR-466i-5p  | 242.246   | -0.347594 | 0.472383 | -0.73583  | 0.461834 |
| mmu-miR-6916-5p  | 0.801765  | -0.337557 | 0.459348 | -0.734861 | 0.462424 |

|                       |          |           |          |           |          |
|-----------------------|----------|-----------|----------|-----------|----------|
| mmu-miR-7221-3p       | 1.4321   | 0.395267  | 0.538958 | 0.733391  | 0.46332  |
| mmu-miR-451a          | 7567.29  | -0.218548 | 0.299752 | -0.729096 | 0.465943 |
| mmu-miR-28a-3p        | 68.1175  | 0.282258  | 0.387146 | 0.729074  | 0.465956 |
| mmu-miR-200b-5p       | 13.5613  | -0.536532 | 0.737442 | -0.727558 | 0.466884 |
| mmu-miR-7031-3p       | 3.16767  | -0.44674  | 0.614037 | -0.727546 | 0.466891 |
| mmu-miR-7052-3p       | 4.95262  | -0.513664 | 0.706883 | -0.72666  | 0.467434 |
| mmu-miR-299a-3p       | 7.29493  | -0.537557 | 0.740996 | -0.725453 | 0.468174 |
| mmu-miR-466f-3p       | 20.5726  | -0.47072  | 0.651082 | -0.722982 | 0.469691 |
| mmu-miR-7034-5p       | 0.232659 | -0.310568 | 0.430302 | -0.721745 | 0.470452 |
| mmu-miR-150-5p        | 723.758  | -0.139806 | 0.193735 | -0.721634 | 0.470519 |
| mmu-miR-6919-5p       | 0.415763 | -0.321524 | 0.447089 | -0.719149 | 0.472049 |
| mmu-miR-154-5p        | 14.0658  | 0.473175  | 0.663662 | 0.712977  | 0.47586  |
| <b>mmu-miR-29a-5p</b> | 6.10592  | 0.528318  | 0.74111  | 0.712873  | 0.475924 |
| mmu-miR-145a-5p       | 42.2526  | -0.453075 | 0.637048 | -0.71121  | 0.476954 |
| mmu-miR-3084-3p       | 1.60828  | -0.432463 | 0.60894  | -0.71019  | 0.477586 |
| mmu-miR-7061-3p       | 29.2728  | 0.461453  | 0.650176 | 0.709736  | 0.477868 |
| mmu-miR-135a-2-3p     | 0.254102 | -0.309748 | 0.436888 | -0.708986 | 0.478333 |
| mmu-miR-3970          | 1.23487  | 0.49055   | 0.693014 | 0.70785   | 0.479038 |
| mmu-miR-7005-5p       | 6.74096  | 0.523891  | 0.741046 | 0.706962  | 0.47959  |
| mmu-miR-3060-3p       | 11.1254  | 0.523061  | 0.739899 | 0.706936  | 0.479606 |
| mmu-miR-7076-3p       | 0.810234 | -0.381742 | 0.540567 | -0.706189 | 0.480071 |
| mmu-miR-411-5p        | 39.8763  | 0.471064  | 0.669184 | 0.703937  | 0.481472 |
| mmu-miR-6361          | 0.461178 | -0.314385 | 0.44878  | -0.700533 | 0.483595 |
| mmu-miR-106b-5p       | 424.375  | -0.203072 | 0.292188 | -0.695005 | 0.487052 |
| mmu-miR-7213-3p       | 1.27392  | -0.322982 | 0.464909 | -0.694722 | 0.48723  |
| mmu-miR-135a-1-3p     | 4.53773  | 0.486884  | 0.702759 | 0.692817  | 0.488424 |
| mmu-miR-3073a-5p      | 0.224629 | 0.293138  | 0.424058 | 0.691269  | 0.489397 |
| mmu-miR-6941-3p       | 0.224629 | 0.293138  | 0.424058 | 0.691269  | 0.489397 |
| mmu-miR-7042-3p       | 2.95225  | -0.484129 | 0.701089 | -0.690538 | 0.489856 |
| mmu-miR-592-3p        | 0.781688 | 0.315015  | 0.460309 | 0.684355  | 0.493751 |
| mmu-miR-6911-3p       | 4.00315  | 0.44939   | 0.6597   | 0.681204  | 0.495742 |
| mmu-miR-3076-3p       | 2.14678  | 0.47898   | 0.70336  | 0.680988  | 0.495879 |
| mmu-miR-340-3p        | 5.24773  | 0.503905  | 0.740442 | 0.680546  | 0.496159 |
| mmu-miR-3472          | 0.191863 | 0.288013  | 0.423443 | 0.680169  | 0.496397 |
| mmu-miR-147-5p        | 0.439363 | -0.303696 | 0.447901 | -0.678043 | 0.497744 |
| mmu-miR-7687-5p       | 4.70233  | -0.480803 | 0.70983  | -0.67735  | 0.498184 |
| mmu-miR-7020-3p       | 3.83131  | 0.498332  | 0.739156 | 0.674191  | 0.50019  |
| mmu-miR-195a-5p       | 39.0104  | -0.380387 | 0.567223 | -0.670613 | 0.502467 |
| mmu-miR-6985-3p       | 0.240425 | 0.285634  | 0.425941 | 0.670596  | 0.502478 |
| mmu-miR-872-3p        | 14.7952  | 0.490358  | 0.734954 | 0.667195  | 0.504647 |
| mmu-miR-218-1-3p      | 2.1908   | -0.374567 | 0.564231 | -0.663854 | 0.506784 |
| mmu-miR-1231-5p       | 0.400823 | -0.295962 | 0.446865 | -0.662307 | 0.507774 |
| mmu-miR-27b-5p        | 6.30975  | 0.489339  | 0.739442 | 0.661769  | 0.50812  |
| mmu-miR-133a-5p       | 19.0519  | 0.474518  | 0.719807 | 0.659229  | 0.509749 |
| mmu-miR-6990-3p       | 0.236374 | -0.286038 | 0.434447 | -0.658396 | 0.510284 |
| mmu-miR-378a-3p       | 1782.94  | 0.17325   | 0.263756 | 0.656855  | 0.511274 |
| mmu-miR-130a-3p       | 331.638  | 0.172419  | 0.263766 | 0.653681  | 0.513317 |
| mmu-miR-7658-3p       | 4.83093  | -0.473543 | 0.732646 | -0.646346 | 0.518055 |

|                 |           |            |          |           |          |
|-----------------|-----------|------------|----------|-----------|----------|
| mmu-miR-1927    | 1.2854    | -0.299637  | 0.464672 | -0.644836 | 0.519034 |
| mmu-miR-6946-3p | 1.89536   | -0.448351  | 0.695392 | -0.644746 | 0.519092 |
| mmu-miR-146a-3p | 0.0574079 | -0.249285  | 0.388196 | -0.642163 | 0.520767 |
| mmu-miR-155-3p  | 0.0574079 | -0.249285  | 0.388196 | -0.642163 | 0.520767 |
| mmu-miR-206-5p  | 0.0574079 | -0.249285  | 0.388196 | -0.642163 | 0.520767 |
| mmu-miR-341-5p  | 0.0574079 | -0.249285  | 0.388196 | -0.642163 | 0.520767 |
| mmu-miR-212-5p  | 0.0574079 | -0.249285  | 0.388196 | -0.642163 | 0.520767 |
| mmu-miR-488-5p  | 0.0574079 | -0.249285  | 0.388196 | -0.642163 | 0.520767 |
| mmu-miR-767     | 0.0574079 | -0.249285  | 0.388196 | -0.642163 | 0.520767 |
| mmu-miR-3066-5p | 0.0574079 | -0.249285  | 0.388196 | -0.642163 | 0.520767 |
| mmu-miR-5122    | 0.0574079 | -0.249285  | 0.388196 | -0.642163 | 0.520767 |
| mmu-miR-5619-5p | 0.0574079 | -0.249285  | 0.388196 | -0.642163 | 0.520767 |
| mmu-miR-6381    | 0.0574079 | -0.249285  | 0.388196 | -0.642163 | 0.520767 |
| mmu-miR-6386    | 0.0574079 | -0.249285  | 0.388196 | -0.642163 | 0.520767 |
| mmu-miR-378c    | 0.0574079 | -0.249285  | 0.388196 | -0.642163 | 0.520767 |
| mmu-miR-6901-5p | 0.0574079 | -0.249285  | 0.388196 | -0.642163 | 0.520767 |
| mmu-miR-6920-3p | 0.0574079 | -0.249285  | 0.388196 | -0.642163 | 0.520767 |
| mmu-miR-6933-5p | 0.0574079 | -0.249285  | 0.388196 | -0.642163 | 0.520767 |
| mmu-miR-6947-3p | 0.0574079 | -0.249285  | 0.388196 | -0.642163 | 0.520767 |
| mmu-miR-6949-3p | 0.0574079 | -0.249285  | 0.388196 | -0.642163 | 0.520767 |
| mmu-miR-6963-5p | 0.0574079 | -0.249285  | 0.388196 | -0.642163 | 0.520767 |
| mmu-miR-6988-5p | 0.0574079 | -0.249285  | 0.388196 | -0.642163 | 0.520767 |
| mmu-miR-7037-3p | 0.0574079 | -0.249285  | 0.388196 | -0.642163 | 0.520767 |
| mmu-miR-7050-3p | 0.0574079 | -0.249285  | 0.388196 | -0.642163 | 0.520767 |
| mmu-miR-7087-5p | 0.0574079 | -0.249285  | 0.388196 | -0.642163 | 0.520767 |
| mmu-miR-7234-3p | 0.0574079 | -0.249285  | 0.388196 | -0.642163 | 0.520767 |
| mmu-miR-7241-3p | 0.0574079 | -0.249285  | 0.388196 | -0.642163 | 0.520767 |
| mmu-miR-6387    | 0.182896  | -0.270609  | 0.421496 | -0.64202  | 0.52086  |
| mmu-miR-668-3p  | 7.87715   | -0.472747  | 0.737348 | -0.641145 | 0.521429 |
| mmu-miR-6991-5p | 1.13132   | -0.305575  | 0.47829  | -0.63889  | 0.522895 |
| mmu-miR-8105    | 5.809     | -0.467979  | 0.737023 | -0.634958 | 0.525456 |
| mmu-miR-92b-5p  | 10.216    | -0.469955  | 0.740374 | -0.634754 | 0.525589 |
| mmu-miR-342-5p  | 10.1829   | 0.469121   | 0.741118 | 0.632991  | 0.52674  |
| mmu-let-7d-3p   | 3813.45   | -0.0827175 | 0.13123  | -0.630327 | 0.528481 |
| mmu-miR-17-3p   | 35.9249   | -0.308676  | 0.49027  | -0.629603 | 0.528954 |
| mmu-miR-181d-3p | 1.98546   | -0.312785  | 0.497105 | -0.629214 | 0.529209 |
| mmu-miR-3105-5p | 0.2125    | 0.268911   | 0.428089 | 0.628166  | 0.529895 |
| mmu-miR-6935-5p | 0.3833    | 0.278621   | 0.445336 | 0.625641  | 0.53155  |
| mmu-miR-3063-3p | 0.199086  | -0.262941  | 0.423453 | -0.620945 | 0.534636 |
| mmu-miR-6406    | 0.199086  | -0.262941  | 0.423453 | -0.620945 | 0.534636 |
| mmu-miR-1947-3p | 2.50309   | 0.459277   | 0.741018 | 0.619792  | 0.535394 |
| mmu-miR-409-5p  | 0.222736  | -0.264063  | 0.42651  | -0.619126 | 0.535833 |
| mmu-miR-1898    | 0.473141  | -0.279474  | 0.451788 | -0.618596 | 0.536183 |
| mmu-miR-207     | 2.78941   | -0.398092  | 0.643584 | -0.618555 | 0.536209 |
| mmu-miR-467a-3p | 0.832394  | -0.284256  | 0.459673 | -0.618388 | 0.536319 |
| mmu-miR-1198-5p | 944.913   | -0.122573  | 0.198592 | -0.617209 | 0.537097 |
| mmu-miR-377-3p  | 1.40971   | 0.36776    | 0.600415 | 0.61251   | 0.5402   |
| mmu-miR-7652-3p | 0.184094  | 0.25403    | 0.417591 | 0.608322  | 0.542974 |

|                      |           |           |          |           |          |
|----------------------|-----------|-----------|----------|-----------|----------|
| mmu-miR-320-5p       | 1.08667   | -0.373172 | 0.614037 | -0.607735 | 0.543363 |
| mmu-miR-7021-5p      | 0.212538  | -0.261148 | 0.431834 | -0.604743 | 0.54535  |
| mmu-miR-6934-5p      | 5.28122   | 0.414109  | 0.685933 | 0.603717  | 0.546032 |
| mmu-miR-151-5p       | 36.2098   | -0.377887 | 0.626394 | -0.603273 | 0.546327 |
| mmu-miR-760-5p       | 3.10631   | 0.416421  | 0.691486 | 0.602212  | 0.547033 |
| mmu-miR-409-3p       | 43.4167   | 0.339053  | 0.563461 | 0.601732  | 0.547353 |
| mmu-miR-182-3p       | 0.0495545 | -0.231996 | 0.38595  | -0.601104 | 0.547771 |
| mmu-miR-377-5p       | 0.0495545 | -0.231996 | 0.38595  | -0.601104 | 0.547771 |
| mmu-miR-370-5p       | 0.0495545 | -0.231996 | 0.38595  | -0.601104 | 0.547771 |
| mmu-miR-551b-3p      | 0.0495545 | -0.231996 | 0.38595  | -0.601104 | 0.547771 |
| mmu-miR-677-3p       | 0.0495545 | -0.231996 | 0.38595  | -0.601104 | 0.547771 |
| mmu-miR-875-3p       | 0.0495545 | -0.231996 | 0.38595  | -0.601104 | 0.547771 |
| mmu-miR-1901         | 0.0495545 | -0.231996 | 0.38595  | -0.601104 | 0.547771 |
| mmu-miR-3090-5p      | 0.0495545 | -0.231996 | 0.38595  | -0.601104 | 0.547771 |
| mmu-miR-6342         | 0.0495545 | -0.231996 | 0.38595  | -0.601104 | 0.547771 |
| mmu-miR-6343         | 0.0495545 | -0.231996 | 0.38595  | -0.601104 | 0.547771 |
| mmu-miR-6897-5p      | 0.0495545 | -0.231996 | 0.38595  | -0.601104 | 0.547771 |
| mmu-miR-6930-5p      | 0.0495545 | -0.231996 | 0.38595  | -0.601104 | 0.547771 |
| mmu-miR-6968-5p      | 0.0495545 | -0.231996 | 0.38595  | -0.601104 | 0.547771 |
| mmu-miR-7000-5p      | 0.0495545 | -0.231996 | 0.38595  | -0.601104 | 0.547771 |
| mmu-miR-7093-3p      | 0.0495545 | -0.231996 | 0.38595  | -0.601104 | 0.547771 |
| mmu-miR-7675-5p      | 0.0495545 | -0.231996 | 0.38595  | -0.601104 | 0.547771 |
| mmu-miR-6715-3p      | 0.0495545 | -0.231996 | 0.38595  | -0.601104 | 0.547771 |
| mmu-miR-7681-3p      | 0.0495545 | -0.231996 | 0.38595  | -0.601104 | 0.547771 |
| mmu-miR-433-3p       | 8.8209    | 0.414096  | 0.690011 | 0.60013   | 0.54842  |
| mmu-miR-3962         | 1.96594   | -0.443664 | 0.739603 | -0.599868 | 0.548594 |
| mmu-miR-7040-5p      | 6.81708   | 0.441237  | 0.735975 | 0.599527  | 0.548822 |
| mmu-miR-3094-5p      | 0.167051  | -0.249481 | 0.418347 | -0.59635  | 0.550942 |
| mmu-miR-3964         | 0.167051  | -0.249481 | 0.418347 | -0.59635  | 0.550942 |
| mmu-miR-6987-5p      | 0.167051  | -0.249481 | 0.418347 | -0.59635  | 0.550942 |
| mmu-miR-7025-5p      | 1.53839   | -0.323783 | 0.543909 | -0.595288 | 0.551651 |
| mmu-miR-370-3p       | 1.14973   | -0.330013 | 0.555555 | -0.594025 | 0.552495 |
| mmu-miR-6385         | 0.364277  | -0.267728 | 0.450981 | -0.593657 | 0.552742 |
| mmu-miR-542-5p       | 4.5914    | 0.407194  | 0.686944 | 0.592761  | 0.553341 |
| mmu-miR-6976-3p      | 1.22377   | -0.33399  | 0.566142 | -0.58994  | 0.555231 |
| mmu-miR-98-3p        | 34.0135   | -0.333464 | 0.565871 | -0.589292 | 0.555665 |
| mmu-miR-539-3p       | 0.384003  | 0.262787  | 0.447226 | 0.587592  | 0.556806 |
| mmu-miR-7010-5p      | 10.4776   | 0.421538  | 0.719872 | 0.585573  | 0.558162 |
| mmu-miR-3102-3p.2-3p | 8.82044   | -0.422071 | 0.727598 | -0.580088 | 0.561855 |
| mmu-miR-361-5p       | 170.529   | 0.191723  | 0.330638 | 0.579858  | 0.56201  |
| mmu-miR-485-3p       | 21.917    | 0.402877  | 0.695405 | 0.579342  | 0.562358 |
| mmu-miR-6944-5p      | 0.210655  | -0.248803 | 0.430518 | -0.577916 | 0.563321 |
| mmu-miR-7031-5p      | 0.782132  | -0.270568 | 0.469182 | -0.57668  | 0.564156 |
| mmu-miR-331-3p       | 1.9982    | -0.317463 | 0.551006 | -0.576152 | 0.564512 |
| mmu-miR-6380         | 0.183104  | -0.241636 | 0.42023  | -0.57501  | 0.565285 |
| mmu-miR-8102         | 0.183104  | -0.241636 | 0.42023  | -0.57501  | 0.565285 |
| mmu-miR-8106         | 0.183104  | -0.241636 | 0.42023  | -0.57501  | 0.565285 |
| mmu-miR-99a-3p       | 5.56515   | 0.403749  | 0.7036   | 0.573832  | 0.566081 |

|                   |           |           |          |           |          |
|-------------------|-----------|-----------|----------|-----------|----------|
| mmu-miR-8103      | 16.2966   | 0.386727  | 0.674757 | 0.573136  | 0.566553 |
| mmu-miR-30a-5p    | 10905.7   | -0.105271 | 0.18369  | -0.573091 | 0.566583 |
| mmu-miR-7676-3p   | 0.683913  | -0.280462 | 0.491921 | -0.570137 | 0.568585 |
| mmu-miR-6961-5p   | 1.70022   | 0.30265   | 0.534529 | 0.5662    | 0.571258 |
| mmu-miR-6961-3p   | 1.97104   | 0.402871  | 0.716486 | 0.562288  | 0.57392  |
| mmu-miR-770-3p    | 2.43146   | 0.344634  | 0.615475 | 0.559948  | 0.575515 |
| mmu-miR-24-3p     | 6644.74   | -0.131785 | 0.235889 | -0.558673 | 0.576385 |
| mmu-miR-20a-3p    | 0.252855  | -0.239083 | 0.428583 | -0.557845 | 0.57695  |
| mmu-miR-7119-3p   | 0.431821  | -0.250035 | 0.44906  | -0.556796 | 0.577667 |
| mmu-miR-7684-3p   | 1.65875   | -0.395478 | 0.710857 | -0.55634  | 0.577979 |
| mmu-miR-126b-3p   | 11.9987   | 0.319426  | 0.574243 | 0.556255  | 0.578036 |
| mmu-miR-211-3p    | 0.590268  | -0.253044 | 0.455797 | -0.555168 | 0.57878  |
| mmu-miR-448-3p    | 0.188409  | 0.237641  | 0.428702 | 0.554327  | 0.579355 |
| mmu-miR-346-5p    | 0.0415634 | -0.211673 | 0.383226 | -0.552344 | 0.580713 |
| mmu-miR-200c-5p   | 0.0415634 | -0.211673 | 0.383226 | -0.552344 | 0.580713 |
| mmu-miR-381-5p    | 0.0415634 | -0.211673 | 0.383226 | -0.552344 | 0.580713 |
| mmu-miR-383-3p    | 0.0415634 | -0.211673 | 0.383226 | -0.552344 | 0.580713 |
| mmu-miR-452-5p    | 0.0415634 | -0.211673 | 0.383226 | -0.552344 | 0.580713 |
| mmu-miR-489-3p    | 0.0415634 | -0.211673 | 0.383226 | -0.552344 | 0.580713 |
| mmu-miR-374b-3p   | 0.0415634 | -0.211673 | 0.383226 | -0.552344 | 0.580713 |
| mmu-miR-665-3p    | 0.0415634 | -0.211673 | 0.383226 | -0.552344 | 0.580713 |
| mmu-miR-3106-3p   | 0.0415634 | -0.211673 | 0.383226 | -0.552344 | 0.580713 |
| mmu-miR-344d-1-5p | 0.0415634 | -0.211673 | 0.383226 | -0.552344 | 0.580713 |
| mmu-miR-678       | 0.0415634 | -0.211673 | 0.383226 | -0.552344 | 0.580713 |
| mmu-miR-509-5p    | 0.0415634 | -0.211673 | 0.383226 | -0.552344 | 0.580713 |
| mmu-miR-3072-5p   | 0.0415634 | -0.211673 | 0.383226 | -0.552344 | 0.580713 |
| mmu-miR-1912-5p   | 0.0415634 | -0.211673 | 0.383226 | -0.552344 | 0.580713 |
| mmu-miR-6336      | 0.0415634 | -0.211673 | 0.383226 | -0.552344 | 0.580713 |
| mmu-miR-6339      | 0.0415634 | -0.211673 | 0.383226 | -0.552344 | 0.580713 |
| mmu-miR-6346      | 0.0415634 | -0.211673 | 0.383226 | -0.552344 | 0.580713 |
| mmu-miR-6389      | 0.0415634 | -0.211673 | 0.383226 | -0.552344 | 0.580713 |
| mmu-miR-6402      | 0.0415634 | -0.211673 | 0.383226 | -0.552344 | 0.580713 |
| mmu-miR-6902-5p   | 0.0415634 | -0.211673 | 0.383226 | -0.552344 | 0.580713 |
| mmu-miR-6945-5p   | 0.0415634 | -0.211673 | 0.383226 | -0.552344 | 0.580713 |
| mmu-miR-6974-5p   | 0.0415634 | -0.211673 | 0.383226 | -0.552344 | 0.580713 |
| mmu-miR-6992-3p   | 0.0415634 | -0.211673 | 0.383226 | -0.552344 | 0.580713 |
| mmu-miR-7070-5p   | 0.0415634 | -0.211673 | 0.383226 | -0.552344 | 0.580713 |
| mmu-miR-7075-3p   | 0.0415634 | -0.211673 | 0.383226 | -0.552344 | 0.580713 |
| mmu-miR-7092-5p   | 0.0415634 | -0.211673 | 0.383226 | -0.552344 | 0.580713 |
| mmu-miR-7093-5p   | 0.0415634 | -0.211673 | 0.383226 | -0.552344 | 0.580713 |
| mmu-miR-3569-3p   | 0.0415634 | -0.211673 | 0.383226 | -0.552344 | 0.580713 |
| mmu-miR-292b-3p   | 0.0415634 | -0.211673 | 0.383226 | -0.552344 | 0.580713 |
| mmu-miR-465d-3p   | 0.0415634 | -0.211673 | 0.383226 | -0.552344 | 0.580713 |
| mmu-miR-216c-3p   | 0.0415634 | -0.211673 | 0.383226 | -0.552344 | 0.580713 |
| mmu-miR-1258-5p   | 0.0415634 | -0.211673 | 0.383226 | -0.552344 | 0.580713 |
| mmu-miR-7243-3p   | 0.0415634 | -0.211673 | 0.383226 | -0.552344 | 0.580713 |
| mmu-miR-8093      | 0.0415634 | -0.211673 | 0.383226 | -0.552344 | 0.580713 |
| mmu-miR-8101      | 0.0415634 | -0.211673 | 0.383226 | -0.552344 | 0.580713 |

|                  |           |           |          |           |          |
|------------------|-----------|-----------|----------|-----------|----------|
| mmu-miR-8118     | 0.0415634 | -0.211673 | 0.383226 | -0.552344 | 0.580713 |
| mmu-miR-141-5p   | 4.71108   | -0.340216 | 0.616549 | -0.551807 | 0.581081 |
| mmu-miR-6952-3p  | 5.26757   | -0.406796 | 0.737327 | -0.551717 | 0.581142 |
| mmu-miR-30c-2-3p | 9.14718   | -0.406192 | 0.739704 | -0.549128 | 0.582918 |
| mmu-miR-1192     | 16.2381   | -0.3219   | 0.588227 | -0.547237 | 0.584216 |
| mmu-miR-6979-3p  | 4.6562    | -0.383317 | 0.704679 | -0.54396  | 0.586469 |
| mmu-miR-1964-3p  | 51.9978   | -0.325445 | 0.599745 | -0.542639 | 0.587378 |
| mmu-miR-7b-5p    | 0.488276  | 0.255567  | 0.475173 | 0.53784   | 0.590688 |
| mmu-miR-7676-5p  | 0.418182  | -0.239112 | 0.444969 | -0.537367 | 0.591014 |
| mmu-miR-130a-5p  | 3.04038   | 0.355692  | 0.664754 | 0.535073  | 0.592599 |
| mmu-miR-3071-3p  | 0.308553  | 0.2339    | 0.437886 | 0.534157  | 0.593233 |
| mmu-miR-27a-5p   | 11.5188   | 0.393971  | 0.738336 | 0.533594  | 0.593623 |
| mmu-miR-7079-3p  | 3.21455   | -0.376023 | 0.704999 | -0.533367 | 0.59378  |
| mmu-miR-24-2-5p  | 28.7567   | -0.387933 | 0.727372 | -0.533336 | 0.593801 |
| mmu-miR-6906-5p  | 0.607727  | -0.241123 | 0.454117 | -0.53097  | 0.595439 |
| mmu-miR-7073-3p  | 0.655644  | 0.299112  | 0.564289 | 0.530069  | 0.596064 |
| mmu-miR-6899-3p  | 0.858751  | -0.244241 | 0.461681 | -0.529025 | 0.596788 |
| mmu-miR-7669-3p  | 1.819     | 0.284655  | 0.541402 | 0.525773  | 0.599046 |
| mmu-miR-3473b    | 19.4668   | -0.361634 | 0.690522 | -0.523711 | 0.600479 |
| mmu-miR-196b-5p  | 67.3359   | 0.340541  | 0.650434 | 0.52356   | 0.600585 |
| mmu-miR-1930-5p  | 5.69976   | 0.366063  | 0.699585 | 0.523257  | 0.600796 |
| mmu-miR-1b-5p    | 673.163   | 0.136734  | 0.262094 | 0.521697  | 0.601881 |
| mmu-miR-1943-5p  | 43.5806   | -0.209619 | 0.402264 | -0.521099 | 0.602298 |
| mmu-miR-7072-3p  | 0.90979   | 0.292123  | 0.56266  | 0.519181  | 0.603634 |
| mmu-miR-210-3p   | 78.9777   | -0.22405  | 0.433793 | -0.516492 | 0.605511 |
| mmu-miR-7024-5p  | 5.39367   | 0.382533  | 0.740823 | 0.516362  | 0.605602 |
| mmu-miR-543-3p   | 9.08116   | 0.377165  | 0.734044 | 0.513818  | 0.607379 |
| mmu-miR-452-3p   | 0.186819  | -0.218842 | 0.427301 | -0.512151 | 0.608546 |
| mmu-miR-200a-3p  | 153.195   | 0.151514  | 0.296002 | 0.51187   | 0.608742 |
| mmu-miR-376b-5p  | 9.44462   | 0.37137   | 0.72613  | 0.511437  | 0.609045 |
| mmu-miR-7224-3p  | 2.21475   | 0.294372  | 0.5757   | 0.51133   | 0.60912  |
| mmu-miR-99a-5p   | 72.3981   | 0.262082  | 0.51753  | 0.50641   | 0.612569 |
| mmu-miR-423-5p   | 6713.21   | -0.113329 | 0.223899 | -0.506163 | 0.612742 |
| mmu-let-7f-5p    | 1866.44   | 0.0887529 | 0.175363 | 0.50611   | 0.612779 |
| mmu-miR-3098-3p  | 1.08295   | -0.321253 | 0.63579  | -0.505281 | 0.613361 |
| mmu-miR-679-3p   | 0.678052  | 0.269602  | 0.533588 | 0.505262  | 0.613375 |
| mmu-miR-3572-5p  | 2.25382   | 0.295903  | 0.585828 | 0.505102  | 0.613487 |
| mmu-miR-3085-5p  | 1.18176   | -0.348049 | 0.689257 | -0.504963 | 0.613585 |
| mmu-miR-1892     | 3.2679    | -0.358527 | 0.71027  | -0.504775 | 0.613717 |
| mmu-miR-7119-5p  | 9.58448   | 0.334155  | 0.666594 | 0.501288  | 0.616168 |
| mmu-miR-15b-5p   | 671.435   | 0.103148  | 0.207181 | 0.497863  | 0.618581 |
| mmu-miR-92b-3p   | 109.515   | 0.219349  | 0.442531 | 0.495669  | 0.620128 |
| mmu-miR-7655-5p  | 0.366154  | 0.220186  | 0.445316 | 0.494449  | 0.620989 |
| mmu-miR-23b-5p   | 0.362322  | 0.217738  | 0.44128  | 0.493424  | 0.621713 |
| mmu-miR-208b-5p  | 0.362322  | 0.217738  | 0.44128  | 0.493424  | 0.621713 |
| mmu-miR-129b-5p  | 5.94235   | 0.354533  | 0.719073 | 0.493042  | 0.621983 |
| mmu-miR-30e-3p   | 19.8272   | -0.342405 | 0.697633 | -0.49081  | 0.623561 |
| mmu-miR-148b-5p  | 34.8633   | 0.306141  | 0.624528 | 0.490195  | 0.623996 |

|                   |          |           |          |           |          |
|-------------------|----------|-----------|----------|-----------|----------|
| mmu-miR-1224-5p   | 5.59731  | 0.360103  | 0.734995 | 0.48994   | 0.624176 |
| mmu-miR-7028-5p   | 0.574584 | 0.223298  | 0.456589 | 0.489057  | 0.624802 |
| mmu-miR-6516-5p   | 2.17338  | 0.272243  | 0.557583 | 0.488255  | 0.625369 |
| mmu-miR-6408      | 0.330533 | 0.217511  | 0.445777 | 0.487937  | 0.625594 |
| mmu-miR-7214-5p   | 1.05662  | 0.310286  | 0.636475 | 0.487508  | 0.625899 |
| mmu-miR-3059-5p   | 0.146262 | 0.197679  | 0.408208 | 0.48426   | 0.628201 |
| mmu-miR-155-5p    | 173.742  | 0.17952   | 0.370963 | 0.483929  | 0.628436 |
| mmu-miR-6984-5p   | 0.603285 | -0.265278 | 0.551554 | -0.480965 | 0.630541 |
| mmu-miR-301a-3p   | 189.753  | -0.169604 | 0.35275  | -0.480806 | 0.630654 |
| mmu-miR-466m-3p   | 4.74185  | 0.335977  | 0.699548 | 0.480277  | 0.63103  |
| mmu-miR-691       | 0.145578 | 0.196231  | 0.408616 | 0.480235  | 0.63106  |
| mmu-miR-28c       | 0.834396 | -0.267922 | 0.559895 | -0.478522 | 0.632278 |
| mmu-miR-1894-3p   | 2.69072  | 0.329329  | 0.689956 | 0.477319  | 0.633135 |
| mmu-miR-6994-5p   | 0.148912 | 0.194771  | 0.409024 | 0.476184  | 0.633943 |
| mmu-miR-1306-3p   | 9.35876  | 0.350829  | 0.739498 | 0.474416  | 0.635204 |
| mmu-miR-6973a-5p  | 2.05364  | -0.29298  | 0.619495 | -0.472933 | 0.636261 |
| mmu-miR-15a-5p    | 1028     | 0.0972699 | 0.206038 | 0.472097  | 0.636858 |
| mmu-miR-125b-2-3p | 51.6853  | 0.259307  | 0.549326 | 0.472046  | 0.636894 |
| mmu-miR-495-3p    | 6.19448  | 0.324084  | 0.686601 | 0.472013  | 0.636918 |
| mmu-miR-7661-5p   | 6.50186  | -0.328538 | 0.698302 | -0.470481 | 0.638011 |
| mmu-miR-7688-5p   | 3.91587  | -0.307347 | 0.656218 | -0.468361 | 0.639526 |
| mmu-miR-1942      | 0.454277 | -0.215475 | 0.461485 | -0.466918 | 0.640559 |
| mmu-miR-151-3p    | 789.657  | -0.1234   | 0.265137 | -0.465418 | 0.641632 |
| mmu-miR-1a-3p     | 1775.92  | 0.127145  | 0.273221 | 0.465354  | 0.641678 |
| mmu-miR-6906-3p   | 0.507662 | -0.239711 | 0.517633 | -0.46309  | 0.6433   |
| mmu-miR-6974-3p   | 0.910983 | 0.250914  | 0.542657 | 0.46238   | 0.643809 |
| mmu-miR-6967-3p   | 27.0178  | -0.339464 | 0.735152 | -0.46176  | 0.644254 |
| mmu-miR-5132-5p   | 5.78927  | 0.33814   | 0.738674 | 0.457766  | 0.647121 |
| mmu-miR-194-5p    | 34.5462  | -0.268585 | 0.586842 | -0.457679 | 0.647183 |
| mmu-miR-221-5p    | 0.763505 | 0.211252  | 0.463145 | 0.456126  | 0.648299 |
| mmu-miR-218-5p    | 31.2342  | -0.28525  | 0.627796 | -0.454367 | 0.649564 |
| mmu-miR-106a-5p   | 11.1825  | 0.335821  | 0.740322 | 0.453615  | 0.650106 |
| mmu-miR-6948-3p   | 3.33447  | 0.303199  | 0.671142 | 0.451765  | 0.651438 |
| mmu-miR-30a-3p    | 96.0317  | -0.178342 | 0.394792 | -0.451738 | 0.651458 |
| mmu-miR-6349      | 0.268018 | 0.195722  | 0.433902 | 0.451075  | 0.651936 |
| mmu-miR-6902-3p   | 0.535235 | -0.245028 | 0.54419  | -0.450263 | 0.652521 |
| mmu-miR-7230-5p   | 0.250976 | -0.194265 | 0.431507 | -0.450202 | 0.652565 |
| mmu-miR-7094-1-5p | 0.769198 | -0.207085 | 0.460353 | -0.44984  | 0.652826 |
| mmu-miR-7060-5p   | 0.424623 | -0.200176 | 0.445786 | -0.44904  | 0.653403 |
| mmu-miR-344d-3-5p | 0.561105 | 0.218648  | 0.48805  | 0.448003  | 0.654151 |
| mmu-miR-3083-5p   | 0.4152   | -0.200881 | 0.449517 | -0.44688  | 0.654961 |
| mmu-let-7j        | 2.25936  | -0.330877 | 0.740754 | -0.446676 | 0.655109 |
| mmu-miR-6970-3p   | 0.141332 | -0.182899 | 0.409962 | -0.446136 | 0.655499 |
| mmu-miR-181c-5p   | 175.833  | -0.146451 | 0.32842  | -0.445925 | 0.655651 |
| mmu-miR-6943-5p   | 0.525671 | -0.201548 | 0.454369 | -0.443577 | 0.657348 |
| mmu-miR-122-5p    | 3828.87  | 0.141761  | 0.319987 | 0.44302   | 0.657751 |
| mmu-miR-7226-5p   | 0.694372 | 0.237731  | 0.536902 | 0.442783  | 0.657923 |
| mmu-miR-6914-5p   | 5.62247  | 0.318742  | 0.720345 | 0.442486  | 0.658138 |



|                 |          |           |          |           |          |
|-----------------|----------|-----------|----------|-----------|----------|
| mmu-miR-301b-3p | 23.6743  | 0.299473  | 0.678414 | 0.441431  | 0.658901 |
| mmu-miR-331-5p  | 3.04353  | -0.297675 | 0.676651 | -0.439924 | 0.659992 |
| mmu-miR-672-5p  | 10.8832  | -0.319921 | 0.729556 | -0.438514 | 0.661014 |
| mmu-miR-7027-5p | 1.21244  | 0.29787   | 0.681721 | 0.436938  | 0.662156 |
| mmu-miR-7118-5p | 3.97928  | 0.323466  | 0.741083 | 0.436478  | 0.66249  |
| mmu-miR-1247-5p | 8.12557  | -0.322735 | 0.740993 | -0.435544 | 0.663168 |
| mmu-miR-1668    | 12.6673  | 0.247315  | 0.568178 | 0.435278  | 0.663361 |
| mmu-miR-701-5p  | 0.157385 | -0.178245 | 0.411578 | -0.433076 | 0.66496  |
| mmu-miR-6926-3p | 0.157385 | -0.178245 | 0.411578 | -0.433076 | 0.66496  |
| mmu-miR-7069-5p | 0.674578 | 0.235362  | 0.543966 | 0.432679  | 0.665248 |
| mmu-miR-8104    | 0.20003  | 0.17912   | 0.415096 | 0.431514  | 0.666094 |
| mmu-miR-217-3p  | 1.39779  | -0.231917 | 0.537528 | -0.431451 | 0.666141 |
| mmu-miR-137-5p  | 22.6444  | 0.241115  | 0.559859 | 0.43067   | 0.666708 |
| mmu-miR-7055-3p | 0.156701 | -0.177381 | 0.41188  | -0.430663 | 0.666714 |
| mmu-miR-324-5p  | 49.2139  | -0.210322 | 0.490543 | -0.428754 | 0.668102 |
| mmu-miR-6395    | 4.80345  | -0.31724  | 0.740736 | -0.428277 | 0.668449 |
| mmu-miR-935     | 0.160035 | -0.176275 | 0.412265 | -0.427576 | 0.66896  |
| mmu-miR-323-3p  | 11.8601  | 0.308181  | 0.720952 | 0.427464  | 0.669041 |
| mmu-miR-16-2-3p | 138.838  | -0.165058 | 0.388398 | -0.424972 | 0.670857 |
| mmu-miR-345-3p  | 50.188   | -0.255851 | 0.602089 | -0.424938 | 0.670882 |
| mmu-miR-6957-3p | 11.266   | -0.301578 | 0.711318 | -0.423971 | 0.671587 |
| mmu-miR-5110    | 14.3005  | 0.312956  | 0.739652 | 0.423112  | 0.672213 |
| mmu-miR-7116-3p | 6.10694  | -0.30992  | 0.733757 | -0.422374 | 0.672752 |
| mmu-miR-7076-5p | 0.324935 | 0.186664  | 0.44285  | 0.421506  | 0.673386 |
| mmu-miR-7040-3p | 4.16189  | 0.288644  | 0.686324 | 0.420565  | 0.674073 |
| mmu-miR-7654-5p | 0.173181 | -0.173345 | 0.413279 | -0.419437 | 0.674897 |
| mmu-miR-423-3p  | 933.834  | 0.0982465 | 0.235038 | 0.418002  | 0.675945 |
| mmu-miR-101a-3p | 702.814  | 0.086932  | 0.208214 | 0.417512  | 0.676304 |
| mmu-miR-6946-5p | 2.91596  | -0.306904 | 0.740735 | -0.414324 | 0.678637 |
| mmu-miR-7667-3p | 1.64581  | -0.219428 | 0.530397 | -0.413706 | 0.67909  |
| mmu-miR-540-3p  | 8.74598  | -0.301516 | 0.730775 | -0.412597 | 0.679902 |
| mmu-miR-154-3p  | 0.166215 | 0.171649  | 0.416329 | 0.412292  | 0.680125 |
| mmu-miR-679-5p  | 0.166215 | 0.171649  | 0.416329 | 0.412292  | 0.680125 |
| mmu-miR-695     | 0.166215 | 0.171649  | 0.416329 | 0.412292  | 0.680125 |
| mmu-miR-7020-5p | 0.166215 | 0.171649  | 0.416329 | 0.412292  | 0.680125 |
| mmu-miR-532-3p  | 97.3391  | 0.147229  | 0.358457 | 0.410731  | 0.68127  |
| mmu-miR-125a-5p | 1509.62  | 0.085987  | 0.210237 | 0.409001  | 0.682539 |
| mmu-miR-3102-5p | 0.274592 | 0.178498  | 0.437975 | 0.407554  | 0.683601 |
| mmu-miR-7a-1-3p | 36.0201  | -0.188115 | 0.462395 | -0.406827 | 0.684135 |
| mmu-miR-6541    | 1.22335  | -0.282319 | 0.704291 | -0.400856 | 0.688526 |
| mmu-miR-135b-5p | 0.287738 | 0.175483  | 0.438784 | 0.399931  | 0.689207 |
| mmu-miR-376c-3p | 3.81227  | 0.253852  | 0.635742 | 0.3993    | 0.689672 |
| mmu-miR-7023-5p | 0.149532 | -0.163272 | 0.409827 | -0.398393 | 0.690341 |
| mmu-miR-5135    | 0.298503 | -0.17596  | 0.442369 | -0.397767 | 0.690802 |
| mmu-miR-376b-3p | 2.80573  | -0.234759 | 0.594468 | -0.394906 | 0.692912 |
| mmu-miR-7085-5p | 0.665712 | 0.180131  | 0.457457 | 0.393765  | 0.693754 |
| mmu-miR-8099    | 0.25634  | -0.171823 | 0.436578 | -0.393569 | 0.6939   |
| mmu-miR-5107-3p | 6.91916  | -0.27859  | 0.708919 | -0.392979 | 0.694335 |

|                   |          |            |          |           |          |
|-------------------|----------|------------|----------|-----------|----------|
| mmu-miR-669c-3p   | 12.5654  | -0.270656  | 0.688823 | -0.392925 | 0.694375 |
| mmu-miR-7082-5p   | 1.39498  | 0.212496   | 0.542909 | 0.391403  | 0.695499 |
| mmu-miR-6991-3p   | 5.28154  | -0.282984  | 0.724187 | -0.39076  | 0.695974 |
| mmu-miR-7083-3p   | 0.691312 | 0.220648   | 0.565225 | 0.390372  | 0.696261 |
| mmu-miR-184-3p    | 27.7789  | 0.255272   | 0.654095 | 0.390267  | 0.696339 |
| mmu-miR-6769b-3p  | 0.161101 | -0.164119  | 0.421412 | -0.389449 | 0.696944 |
| mmu-miR-378a-5p   | 58.3788  | 0.182195   | 0.467884 | 0.389403  | 0.696978 |
| mmu-miR-493-3p    | 0.211154 | -0.162182  | 0.417474 | -0.388485 | 0.697657 |
| mmu-miR-7015-3p   | 6.56619  | -0.277957  | 0.716131 | -0.388137 | 0.697915 |
| mmu-miR-379-5p    | 27.5663  | 0.235441   | 0.606736 | 0.388045  | 0.697983 |
| mmu-miR-214-3p    | 34.6071  | -0.22015   | 0.573338 | -0.383979 | 0.700994 |
| mmu-miR-6960-3p   | 2.73521  | -0.277823  | 0.72721  | -0.38204  | 0.702432 |
| mmu-miR-203-3p    | 168.885  | 0.151052   | 0.395633 | 0.381798  | 0.702611 |
| mmu-miR-32-3p     | 0.491557 | 0.198478   | 0.520942 | 0.380999  | 0.703204 |
| mmu-miR-5121      | 5.19251  | 0.272548   | 0.718665 | 0.379242  | 0.704508 |
| mmu-miR-669p-3p   | 6.45164  | -0.23097   | 0.6176   | -0.37398  | 0.708419 |
| mmu-miR-6933-3p   | 0.474776 | -0.175283  | 0.470142 | -0.37283  | 0.709275 |
| mmu-miR-6940-5p   | 0.661782 | 0.214926   | 0.577615 | 0.372092  | 0.709824 |
| mmu-miR-199b-5p   | 5.70009  | 0.257365   | 0.694593 | 0.370527  | 0.71099  |
| mmu-miR-7653-5p   | 18.9482  | -0.243577  | 0.658101 | -0.370122 | 0.711292 |
| mmu-miR-31-3p     | 0.125488 | -0.149977  | 0.406125 | -0.369288 | 0.711913 |
| mmu-miR-6516-3p   | 0.125488 | -0.149977  | 0.406125 | -0.369288 | 0.711913 |
| mmu-miR-5128      | 5.60065  | -0.271343  | 0.735106 | -0.369121 | 0.712038 |
| mmu-miR-574-3p    | 457.754  | -0.144764  | 0.392628 | -0.368705 | 0.712348 |
| mmu-miR-7658-5p   | 1.08981  | -0.229902  | 0.623946 | -0.368464 | 0.712527 |
| mmu-miR-26a-2-3p  | 3.3787   | 0.247001   | 0.670397 | 0.36844   | 0.712545 |
| mmu-miR-7115-5p   | 2.79828  | 0.259423   | 0.710062 | 0.365353  | 0.714848 |
| mmu-miR-338-3p    | 0.6967   | 0.195345   | 0.53778  | 0.363244  | 0.716422 |
| mmu-miR-16-5p     | 39417.2  | -0.0888581 | 0.245063 | -0.362593 | 0.716909 |
| mmu-let-7f-1-3p   | 9.68712  | 0.264597   | 0.73199  | 0.361476  | 0.717743 |
| mmu-miR-6960-5p   | 7.14432  | -0.267017  | 0.739248 | -0.361201 | 0.717949 |
| mmu-miR-291b-3p   | 0.463313 | -0.165819  | 0.459693 | -0.360717 | 0.718311 |
| mmu-miR-719       | 0.480326 | 0.162686   | 0.451747 | 0.360127  | 0.718752 |
| mmu-miR-743b-3p   | 0.2033   | -0.148812  | 0.415397 | -0.35824  | 0.720164 |
| mmu-miR-6920-5p   | 0.2033   | -0.148812  | 0.415397 | -0.35824  | 0.720164 |
| mmu-miR-883b-5p   | 0.141541 | -0.146024  | 0.407761 | -0.358111 | 0.72026  |
| mmu-miR-669o-5p   | 2.38166  | -0.260355  | 0.728319 | -0.357474 | 0.720737 |
| mmu-miR-7677-5p   | 0.814501 | -0.229625  | 0.64444  | -0.356317 | 0.721603 |
| mmu-miR-324-3p    | 36.5555  | -0.213493  | 0.599207 | -0.356293 | 0.721621 |
| mmu-miR-219a-2-3p | 8.78585  | -0.260068  | 0.730572 | -0.355978 | 0.721857 |
| mmu-miR-1946b     | 0.140857 | -0.144987  | 0.408195 | -0.35519  | 0.722447 |
| mmu-miR-3077-5p   | 0.140857 | -0.144987  | 0.408195 | -0.35519  | 0.722447 |
| mmu-miR-5626-5p   | 0.140857 | -0.144987  | 0.408195 | -0.35519  | 0.722447 |
| mmu-miR-669l-5p   | 0.514726 | -0.159492  | 0.449167 | -0.355084 | 0.722526 |
| mmu-miR-7683-5p   | 1.56351  | -0.260124  | 0.733127 | -0.354814 | 0.722729 |
| mmu-miR-3092-3p   | 0.144191 | -0.144012  | 0.408601 | -0.35245  | 0.724501 |
| mmu-miR-195b      | 0.144191 | -0.144012  | 0.408601 | -0.35245  | 0.724501 |
| mmu-miR-6993-5p   | 3.08282  | 0.243679   | 0.691688 | 0.352297  | 0.724616 |

|                       |          |            |          |           |          |
|-----------------------|----------|------------|----------|-----------|----------|
| mmu-miR-7008-3p       | 0.340565 | -0.155674  | 0.442617 | -0.351712 | 0.725054 |
| mmu-let-7e-3p         | 37.372   | 0.238787   | 0.679776 | 0.351272  | 0.725384 |
| mmu-miR-590-5p        | 0.157337 | -0.141552  | 0.409624 | -0.345566 | 0.729669 |
| mmu-miR-3067-5p       | 0.157337 | -0.141552  | 0.409624 | -0.345566 | 0.729669 |
| mmu-miR-6898-3p       | 0.157337 | -0.141552  | 0.409624 | -0.345566 | 0.729669 |
| mmu-miR-425-5p        | 577.76   | -0.0950585 | 0.278492 | -0.341333 | 0.732853 |
| mmu-miR-434-5p        | 17.2281  | 0.198182   | 0.581941 | 0.340554  | 0.733439 |
| mmu-miR-7077-3p       | 0.439269 | -0.154027  | 0.452473 | -0.340412 | 0.733546 |
| mmu-miR-129b-3p       | 0.25154  | 0.145499   | 0.427762 | 0.340139  | 0.733752 |
| mmu-miR-7005-3p       | 0.383059 | -0.149992  | 0.441884 | -0.339437 | 0.734281 |
| mmu-miR-676-3p        | 452.285  | -0.100763  | 0.296996 | -0.339274 | 0.734403 |
| mmu-miR-5101          | 1.81402  | -0.222786  | 0.657987 | -0.338587 | 0.734921 |
| mmu-miR-365-1-5p      | 1.54738  | -0.206019  | 0.61075  | -0.337321 | 0.735875 |
| mmu-miR-702-5p        | 0.60901  | -0.166143  | 0.496997 | -0.334293 | 0.738159 |
| mmu-miR-5113          | 38.337   | 0.183906   | 0.550495 | 0.334074  | 0.738324 |
| mmu-miR-671-3p        | 52.4025  | 0.220423   | 0.660814 | 0.333563  | 0.73871  |
| mmu-miR-129-5p        | 8.7877   | -0.242267  | 0.728897 | -0.332374 | 0.739607 |
| mmu-miR-7578          | 2.19588  | -0.206669  | 0.623572 | -0.331428 | 0.740321 |
| mmu-miR-203-5p        | 8.31433  | 0.223095   | 0.675736 | 0.330151  | 0.741286 |
| mmu-miR-7227-5p       | 0.654473 | -0.180498  | 0.547131 | -0.3299   | 0.741476 |
| mmu-miR-3104-3p       | 0.43756  | 0.147096   | 0.445957 | 0.329842  | 0.741519 |
| mmu-miR-302a-5p       | 0.145394 | -0.138017  | 0.418509 | -0.329782 | 0.741565 |
| mmu-miR-6938-3p       | 0.806215 | 0.182994   | 0.555847 | 0.329216  | 0.741993 |
| mmu-miR-7217-3p       | 0.682012 | -0.168966  | 0.515512 | -0.327764 | 0.74309  |
| mmu-miR-345-5p        | 10.664   | 0.235186   | 0.723049 | 0.325269  | 0.744977 |
| <b>mmu-miR-29b-3p</b> | 14.6374  | 0.225936   | 0.700226 | 0.322661  | 0.746952 |
| mmu-miR-21b           | 0.914292 | -0.18662   | 0.578918 | -0.322359 | 0.74718  |
| mmu-miR-1929-5p       | 0.195309 | -0.133032  | 0.413204 | -0.321953 | 0.747488 |
| mmu-miR-7685-5p       | 0.467373 | 0.145316   | 0.451688 | 0.321716  | 0.747668 |
| mmu-miR-5130          | 0.503497 | -0.152105  | 0.473    | -0.321575 | 0.747774 |
| mmu-miR-3971          | 2.11799  | -0.236209  | 0.738049 | -0.320045 | 0.748934 |
| mmu-miR-670-5p        | 1.48336  | -0.201971  | 0.633013 | -0.319064 | 0.749678 |
| mmu-miR-378d          | 1.20825  | 0.221815   | 0.699709 | 0.317011  | 0.751235 |
| mmu-miR-6903-3p       | 3.85482  | -0.234089  | 0.739252 | -0.316657 | 0.751504 |
| mmu-miR-5621-5p       | 0.775418 | -0.181809  | 0.577519 | -0.31481  | 0.752906 |
| mmu-miR-5622-5p       | 2.52351  | -0.217805  | 0.692027 | -0.314735 | 0.752963 |
| mmu-miR-322-3p        | 61.6842  | -0.16276   | 0.522111 | -0.311734 | 0.755243 |
| mmu-miR-497a-5p       | 6.59352  | 0.230203   | 0.739128 | 0.311452  | 0.755457 |
| mmu-miR-6958-3p       | 0.623525 | -0.172521  | 0.554008 | -0.311404 | 0.755493 |
| mmu-miR-7216-3p       | 0.935478 | -0.17955   | 0.579624 | -0.30977  | 0.756736 |
| mmu-miR-6399          | 0.395725 | 0.143709   | 0.464635 | 0.309295  | 0.757097 |
| mmu-miR-674-3p        | 94.8602  | 0.141238   | 0.458826 | 0.307825  | 0.758216 |
| mmu-miR-365-2-5p      | 0.182059 | 0.128715   | 0.42041  | 0.306166  | 0.759478 |
| mmu-miR-494-3p        | 0.182059 | 0.128715   | 0.42041  | 0.306166  | 0.759478 |
| mmu-miR-6972-5p       | 0.182059 | 0.128715   | 0.42041  | 0.306166  | 0.759478 |
| mmu-miR-7070-3p       | 0.182059 | 0.128715   | 0.42041  | 0.306166  | 0.759478 |
| mmu-miR-495-5p        | 0.262663 | -0.131216  | 0.429262 | -0.305678 | 0.75985  |
| mmu-miR-219b-5p       | 1.27816  | 0.208909   | 0.684024 | 0.305412  | 0.760053 |

|                 |          |            |          |           |          |
|-----------------|----------|------------|----------|-----------|----------|
| mmu-miR-369-3p  | 5.08538  | 0.215225   | 0.708901 | 0.303604  | 0.761429 |
| mmu-miR-1934-3p | 5.35954  | -0.22172   | 0.735517 | -0.301447 | 0.763074 |
| mmu-miR-6903-5p | 0.23676  | 0.13053    | 0.433774 | 0.300917  | 0.763478 |
| mmu-miR-5123    | 1.02062  | 0.139532   | 0.464585 | 0.300337  | 0.76392  |
| mmu-miR-682     | 1.48255  | 0.201616   | 0.673387 | 0.299406  | 0.76463  |
| mmu-miR-466l-3p | 0.459958 | 0.13451    | 0.451743 | 0.297758  | 0.765888 |
| mmu-miR-7075-5p | 0.60685  | -0.134017  | 0.452098 | -0.296434 | 0.766898 |
| mmu-miR-1306-5p | 95.2921  | -0.13027   | 0.441572 | -0.295013 | 0.767984 |
| mmu-miR-5616-5p | 0.137403 | -0.122953  | 0.416805 | -0.29499  | 0.768002 |
| mmu-miR-6392-5p | 0.137403 | -0.122953  | 0.416805 | -0.29499  | 0.768002 |
| mmu-miR-6918-3p | 9.31572  | 0.191842   | 0.652458 | 0.294029  | 0.768735 |
| mmu-miR-193b-3p | 18.583   | 0.217878   | 0.741063 | 0.294007  | 0.768753 |
| mmu-miR-700-5p  | 19.9186  | -0.210143  | 0.716614 | -0.293245 | 0.769335 |
| mmu-miR-7063-3p | 0.256679 | -0.125998  | 0.431216 | -0.292192 | 0.77014  |
| mmu-miR-208a-5p | 0.302658 | 0.126857   | 0.434522 | 0.291946  | 0.770328 |
| mmu-miR-3547-3p | 0.87468  | 0.161251   | 0.554529 | 0.290789  | 0.771213 |
| mmu-miR-344b-3p | 0.722934 | 0.132591   | 0.457285 | 0.289953  | 0.771852 |
| mmu-miR-361-3p  | 56.9377  | -0.138013  | 0.478797 | -0.28825  | 0.773156 |
| mmu-miR-7067-3p | 1.619    | 0.209091   | 0.731339 | 0.285902  | 0.774953 |
| mmu-miR-503-5p  | 25.5826  | 0.188089   | 0.66361  | 0.283433  | 0.776845 |
| mmu-miR-3967    | 5.42163  | 0.192935   | 0.680713 | 0.28343   | 0.776847 |
| mmu-miR-5124a   | 3.54769  | 0.209368   | 0.739889 | 0.282973  | 0.777198 |
| mmu-miR-874-5p  | 0.289979 | 0.123512   | 0.436975 | 0.282652  | 0.777444 |
| mmu-miR-1188-3p | 0.272475 | -0.122228  | 0.432623 | -0.282527 | 0.777539 |
| mmu-miR-7074-5p | 0.432446 | -0.127231  | 0.450391 | -0.282491 | 0.777567 |
| mmu-miR-325-3p  | 0.12568  | 0.115655   | 0.409572 | 0.282381  | 0.777651 |
| mmu-miR-669e-3p | 0.249509 | -0.120364  | 0.427184 | -0.281761 | 0.778127 |
| mmu-miR-1900    | 0.350653 | 0.124912   | 0.445667 | 0.28028   | 0.779262 |
| mmu-miR-99b-3p  | 20.1927  | 0.155779   | 0.55707  | 0.27964   | 0.779754 |
| mmu-miR-301a-5p | 0.350117 | 0.123691   | 0.44366  | 0.278797  | 0.780401 |
| mmu-miR-1941-3p | 4.0017   | -0.190387  | 0.686308 | -0.277408 | 0.781467 |
| mmu-miR-6910-3p | 0.254809 | -0.118658  | 0.427886 | -0.277312 | 0.781541 |
| mmu-miR-181a-5p | 1810.62  | -0.0564694 | 0.204637 | -0.275949 | 0.782587 |
| mmu-miR-30d-3p  | 2.27156  | -0.192276  | 0.697248 | -0.275764 | 0.782729 |
| mmu-miR-224-3p  | 2.63942  | -0.203378  | 0.741002 | -0.274464 | 0.783728 |
| mmu-miR-672-3p  | 0.671912 | -0.125529  | 0.458017 | -0.27407  | 0.78403  |
| mmu-miR-98-5p   | 272.945  | -0.0823568 | 0.301364 | -0.27328  | 0.784638 |
| mmu-miR-3474    | 6.31449  | 0.200779   | 0.73821  | 0.271981  | 0.785637 |
| mmu-miR-335-5p  | 18.4701  | -0.197493  | 0.740889 | -0.266563 | 0.789806 |
| mmu-miR-491-3p  | 1.44386  | 0.153675   | 0.579953 | 0.264978  | 0.791026 |
| mmu-miR-466p-5p | 0.340473 | -0.117246  | 0.4445   | -0.26377  | 0.791957 |
| mmu-miR-7650-5p | 0.846536 | 0.167312   | 0.634783 | 0.263573  | 0.792109 |
| mmu-miR-186-3p  | 0.606369 | -0.122139  | 0.465652 | -0.262298 | 0.793092 |
| mmu-miR-142b    | 96.9848  | -0.10782   | 0.411071 | -0.26229  | 0.793097 |
| mmu-miR-6917-5p | 0.435734 | 0.116518   | 0.446444 | 0.260991  | 0.794099 |
| mmu-miR-193a-5p | 10.3273  | 0.191986   | 0.736501 | 0.260673  | 0.794344 |
| mmu-miR-34c-3p  | 3.83171  | 0.182458   | 0.70498  | 0.258813  | 0.795779 |
| mmu-miR-3544-5p | 0.129412 | -0.107224  | 0.415003 | -0.25837  | 0.796122 |

|                   |          |            |          |           |          |
|-------------------|----------|------------|----------|-----------|----------|
| mmu-miR-3966      | 0.655385 | -0.132178  | 0.514069 | -0.257121 | 0.797085 |
| mmu-miR-384-5p    | 0.550254 | 0.115594   | 0.455867 | 0.25357   | 0.799828 |
| mmu-miR-7686-5p   | 0.528605 | 0.115711   | 0.460123 | 0.251478  | 0.801444 |
| mmu-miR-6364      | 1.8961   | 0.175754   | 0.704155 | 0.249595  | 0.8029   |
| mmu-miR-8116      | 11.8061  | -0.184854  | 0.740845 | -0.249518 | 0.80296  |
| mmu-miR-504-5p    | 1.56982  | -0.13331   | 0.534953 | -0.2492   | 0.803206 |
| mmu-miR-379-3p    | 0.24015  | -0.105887  | 0.425635 | -0.248775 | 0.803535 |
| mmu-miR-5125      | 1.13657  | 0.149582   | 0.602122 | 0.248426  | 0.803805 |
| mmu-miR-125b-1-3p | 26.7549  | -0.154346  | 0.623126 | -0.247696 | 0.80437  |
| mmu-miR-6995-3p   | 0.319073 | -0.106856  | 0.432728 | -0.246936 | 0.804958 |
| mmu-miR-3473e     | 3.22028  | -0.155865  | 0.633453 | -0.246056 | 0.805639 |
| mmu-miR-6546-3p   | 1.27307  | 0.17197    | 0.701659 | 0.24509   | 0.806387 |
| mmu-miR-7678-3p   | 0.566285 | -0.111297  | 0.454578 | -0.244836 | 0.806584 |
| mmu-miR-8112      | 21.2538  | 0.167271   | 0.687643 | 0.243252  | 0.80781  |
| mmu-miR-7080-3p   | 0.229318 | -0.105036  | 0.433287 | -0.242418 | 0.808456 |
| mmu-miR-6415      | 0.485401 | -0.109413  | 0.453168 | -0.241441 | 0.809214 |
| mmu-miR-3969      | 2.10124  | 0.178296   | 0.739705 | 0.241036  | 0.809527 |
| mmu-miR-6987-3p   | 0.59681  | -0.114218  | 0.47739  | -0.239254 | 0.810908 |
| mmu-miR-7016-3p   | 6.95486  | 0.170108   | 0.712644 | 0.238699  | 0.811339 |
| mmu-miR-5120      | 2.03001  | -0.14424   | 0.611065 | -0.236046 | 0.813397 |
| mmu-miR-505-3p    | 1.73278  | 0.12864    | 0.545154 | 0.235969  | 0.813457 |
| mmu-miR-26b-3p    | 23.5301  | -0.166108  | 0.707925 | -0.234641 | 0.814488 |
| mmu-miR-421-5p    | 0.651875 | 0.106129   | 0.455165 | 0.233165  | 0.815633 |
| mmu-miR-7006-3p   | 0.357046 | -0.100675  | 0.435255 | -0.231301 | 0.817081 |
| mmu-miR-425-3p    | 97.3847  | 0.0917873  | 0.397646 | 0.230826  | 0.81745  |
| mmu-miR-6352      | 1.23872  | -0.145447  | 0.634374 | -0.229277 | 0.818654 |
| mmu-miR-802-5p    | 5.2601   | -0.162253  | 0.711037 | -0.228191 | 0.819497 |
| mmu-miR-374b-5p   | 29.8021  | 0.137729   | 0.605529 | 0.227452  | 0.820072 |
| mmu-miR-6925-5p   | 0.570083 | 0.12218    | 0.538755 | 0.226783  | 0.820593 |
| mmu-miR-130b-5p   | 133.062  | -0.100111  | 0.445572 | -0.224681 | 0.822228 |
| mmu-miR-137-3p    | 0.133671 | 0.0918608  | 0.411759 | 0.223093  | 0.823463 |
| mmu-miR-5616-3p   | 0.133671 | 0.0918608  | 0.411759 | 0.223093  | 0.823463 |
| mmu-miR-7088-3p   | 0.133671 | 0.0918608  | 0.411759 | 0.223093  | 0.823463 |
| mmu-miR-511-5p    | 40.3338  | -0.125883  | 0.564379 | -0.223047 | 0.823499 |
| mmu-miR-697       | 0.588314 | -0.0998126 | 0.453436 | -0.220125 | 0.825774 |
| mmu-miR-300-3p    | 27.5083  | -0.154622  | 0.711908 | -0.217194 | 0.828057 |
| mmu-miR-708-5p    | 4.08273  | 0.159802   | 0.738037 | 0.216523  | 0.82858  |
| mmu-miR-148a-5p   | 14.3827  | 0.154961   | 0.716136 | 0.216384  | 0.828688 |
| mmu-miR-204-5p    | 54.8527  | 0.10721    | 0.496982 | 0.215722  | 0.829204 |
| mmu-miR-294-3p    | 0.551035 | 0.0995074  | 0.462741 | 0.215039  | 0.829737 |
| mmu-miR-485-5p    | 2.54435  | -0.125209  | 0.58753  | -0.21311  | 0.831241 |
| mmu-miR-704       | 1.13975  | -0.143269  | 0.683802 | -0.209518 | 0.834044 |
| mmu-miR-6984-3p   | 3.99003  | 0.154736   | 0.740622 | 0.208927  | 0.834505 |
| mmu-miR-144-3p    | 20.7247  | -0.139991  | 0.671529 | -0.208466 | 0.834865 |
| mmu-miR-136-3p    | 7.29699  | 0.150655   | 0.728213 | 0.206883  | 0.836101 |
| mmu-miR-210-5p    | 20.625   | 0.145919   | 0.711841 | 0.204988  | 0.837581 |
| mmu-miR-542-3p    | 22.4283  | -0.140318  | 0.700203 | -0.200396 | 0.841171 |
| mmu-miR-7218-3p   | 0.498428 | -0.0999312 | 0.504797 | -0.197963 | 0.843074 |

|                   |          |            |          |           |          |
|-------------------|----------|------------|----------|-----------|----------|
| mmu-miR-3058-3p   | 5.05901  | -0.13562   | 0.686483 | -0.197558 | 0.843391 |
| mmu-miR-1968-5p   | 39.4741  | 0.108041   | 0.546917 | 0.197546  | 0.843401 |
| mmu-miR-7065-3p   | 2.94139  | 0.112574   | 0.576541 | 0.195257  | 0.845191 |
| mmu-miR-1946a     | 1.3354   | -0.103295  | 0.531871 | -0.19421  | 0.846012 |
| mmu-miR-196a-2-3p | 3.2738   | 0.143099   | 0.740808 | 0.193166  | 0.846829 |
| mmu-miR-6986-5p   | 3.23209  | 0.114069   | 0.603197 | 0.189107  | 0.850009 |
| mmu-miR-7047-3p   | 0.893053 | 0.124133   | 0.660625 | 0.187903  | 0.850953 |
| mmu-miR-185-5p    | 469.521  | 0.0499847  | 0.266962 | 0.187235  | 0.851476 |
| mmu-miR-3083-3p   | 0.68924  | 0.108922   | 0.582219 | 0.187081  | 0.851598 |
| mmu-miR-3065-5p   | 1.84191  | 0.129784   | 0.696145 | 0.186432  | 0.852106 |
| mmu-miR-7038-3p   | 0.487149 | 0.0844113  | 0.453531 | 0.18612   | 0.852351 |
| mmu-miR-5620-3p   | 1.03807  | -0.0858895 | 0.461938 | -0.185933 | 0.852497 |
| mmu-miR-5627-3p   | 0.435758 | -0.0839994 | 0.456779 | -0.183895 | 0.854096 |
| mmu-miR-7009-3p   | 0.457795 | -0.0836895 | 0.462419 | -0.180982 | 0.856382 |
| mmu-miR-708-3p    | 2.53368  | -0.11227   | 0.621399 | -0.180673 | 0.856624 |
| mmu-miR-7049-3p   | 0.198933 | -0.0772277 | 0.428157 | -0.180372 | 0.85686  |
| mmu-miR-7036b-3p  | 3.42449  | 0.131111   | 0.733046 | 0.178858  | 0.858049 |
| mmu-miR-378b      | 20.3643  | -0.0985949 | 0.551667 | -0.178722 | 0.858156 |
| mmu-miR-302a-3p   | 0.567352 | 0.0799563  | 0.452239 | 0.176801  | 0.859665 |
| mmu-miR-7116-5p   | 0.673934 | -0.108381  | 0.618019 | -0.175368 | 0.86079  |
| mmu-let-7a-5p     | 4929.36  | -0.0357445 | 0.204278 | -0.17498  | 0.861096 |
| mmu-miR-6909-5p   | 1.41401  | -0.12228   | 0.70094  | -0.174452 | 0.86151  |
| mmu-miR-7043-5p   | 1.66171  | -0.115736  | 0.668786 | -0.173053 | 0.86261  |
| mmu-miR-3068-3p   | 4.04545  | 0.109792   | 0.637769 | 0.17215   | 0.86332  |
| mmu-miR-744-3p    | 15.6057  | 0.110767   | 0.644186 | 0.171948  | 0.863478 |
| mmu-miR-182-5p    | 64.1322  | 0.0841292  | 0.492289 | 0.170894  | 0.864307 |
| mmu-miR-664-5p    | 75.3677  | -0.0819038 | 0.479865 | -0.170681 | 0.864475 |
| mmu-miR-7665-5p   | 2.48998  | 0.111223   | 0.655234 | 0.169746  | 0.86521  |
| mmu-miR-501-3p    | 18.9535  | 0.114723   | 0.680001 | 0.16871   | 0.866025 |
| mmu-miR-150-3p    | 29.4641  | 0.116961   | 0.694    | 0.168532  | 0.866164 |
| mmu-miR-7056-5p   | 4.01253  | -0.118205  | 0.718924 | -0.164419 | 0.869401 |
| mmu-miR-1893      | 2.7033   | 0.118518   | 0.736743 | 0.160868  | 0.872198 |
| mmu-miR-140-5p    | 437.447  | -0.0419099 | 0.261486 | -0.160276 | 0.872664 |
| mmu-miR-7022-5p   | 1.30087  | 0.111182   | 0.699944 | 0.158845  | 0.873791 |
| mmu-miR-7651-3p   | 42.0345  | 0.0593597  | 0.37424  | 0.158614  | 0.873973 |
| mmu-miR-590-3p    | 0.309367 | 0.0700611  | 0.443964 | 0.157808  | 0.874608 |
| mmu-miR-467f      | 2.54499  | -0.0991985 | 0.629194 | -0.15766  | 0.874725 |
| mmu-miR-673-5p    | 8.86154  | -0.0991107 | 0.637884 | -0.155374 | 0.876526 |
| mmu-miR-5623-3p   | 0.555927 | -0.0696027 | 0.451754 | -0.154072 | 0.877553 |
| mmu-miR-5625-3p   | 0.502548 | -0.0687484 | 0.448208 | -0.153385 | 0.878095 |
| mmu-miR-6922-5p   | 0.501722 | 0.0687264  | 0.456088 | 0.150686  | 0.880223 |
| mmu-miR-6985-5p   | 0.37605  | -0.0673212 | 0.448259 | -0.150184 | 0.88062  |
| mmu-miR-6995-5p   | 0.25367  | 0.0658474  | 0.438657 | 0.150111  | 0.880677 |
| mmu-miR-3068-5p   | 8.98416  | -0.111073  | 0.740716 | -0.149954 | 0.880801 |
| mmu-miR-7115-3p   | 1.34407  | -0.106085  | 0.724038 | -0.146519 | 0.883512 |
| mmu-miR-463-3p    | 1.16649  | -0.102745  | 0.702389 | -0.146279 | 0.883701 |
| mmu-miR-875-5p    | 0.650323 | -0.0683034 | 0.467756 | -0.146024 | 0.883903 |
| mmu-miR-183-5p    | 12.0501  | -0.106005  | 0.726962 | -0.145819 | 0.884064 |

|                      |           |            |          |            |          |
|----------------------|-----------|------------|----------|------------|----------|
| mmu-miR-450b-5p      | 6.18195   | -0.0967539 | 0.664972 | -0.145501  | 0.884316 |
| mmu-miR-450b-3p      | 12.183    | -0.101793  | 0.714326 | -0.142503  | 0.886683 |
| mmu-miR-3061-3p      | 7.98965   | 0.102674   | 0.732418 | 0.140185   | 0.888514 |
| mmu-miR-3112-3p      | 2.25337   | -0.100097  | 0.715927 | -0.139815  | 0.888806 |
| mmu-miR-152-5p       | 2.54893   | -0.080213  | 0.58031  | -0.138224  | 0.890063 |
| mmu-miR-1945         | 0.878214  | -0.0703351 | 0.508852 | -0.138223  | 0.890064 |
| mmu-miR-7029-5p      | 0.241502  | 0.0597793  | 0.432695 | 0.138156   | 0.890117 |
| mmu-miR-126b-5p      | 0.241502  | 0.0597793  | 0.432695 | 0.138156   | 0.890117 |
| mmu-miR-483-5p       | 24.9808   | 0.0960851  | 0.707948 | 0.135723   | 0.89204  |
| mmu-miR-762          | 1.08163   | -0.081313  | 0.61585  | -0.132034  | 0.894958 |
| mmu-miR-1191b-3p     | 2.79217   | -0.0766166 | 0.587504 | -0.13041   | 0.896242 |
| mmu-miR-449a-5p      | 7.79121   | 0.0956258  | 0.741071 | 0.129037   | 0.897328 |
| mmu-miR-674-5p       | 142.101   | -0.0599256 | 0.465741 | -0.128667  | 0.897621 |
| mmu-miR-7048-3p      | 4.0288    | -0.0947662 | 0.738139 | -0.128385  | 0.897844 |
| mmu-miR-7653-3p      | 9.90288   | 0.0919889  | 0.720179 | 0.127731   | 0.898362 |
| mmu-miR-34a-5p       | 39.4774   | -0.0735709 | 0.578511 | -0.127173  | 0.898804 |
| mmu-miR-7229-5p      | 0.725144  | -0.056875  | 0.456244 | -0.124659  | 0.900793 |
| mmu-miR-181a-1-3p    | 16.6068   | 0.0810225  | 0.653466 | 0.123989   | 0.901324 |
| mmu-miR-6915-3p      | 0.584466  | -0.0607895 | 0.492656 | -0.123392  | 0.901797 |
| mmu-miR-7647-3p      | 0.62606   | -0.0554227 | 0.458498 | -0.120879  | 0.903787 |
| mmu-miR-7b-3p        | 0.551285  | -0.0549344 | 0.456036 | -0.120461  | 0.904118 |
| mmu-miR-702-3p       | 5.65591   | -0.0877468 | 0.733158 | -0.119683  | 0.904734 |
| mmu-miR-487b-3p      | 4.51447   | 0.0852294  | 0.720505 | 0.118291   | 0.905837 |
| mmu-miR-7220-3p      | 0.183088  | -0.049373  | 0.425618 | -0.116003  | 0.90765  |
| mmu-miR-700-3p       | 3.34753   | -0.0816008 | 0.72422  | -0.112674  | 0.910289 |
| mmu-miR-339-3p       | 22.5272   | 0.0597415  | 0.535142 | 0.111637   | 0.911111 |
| mmu-miR-410-3p       | 11.7887   | -0.0710121 | 0.661151 | -0.107407  | 0.914466 |
| mmu-miR-2136         | 0.641117  | 0.0477836  | 0.455158 | 0.104983   | 0.91639  |
| mmu-miR-3960         | 3.43988   | 0.0752423  | 0.737503 | 0.102023   | 0.918738 |
| mmu-miR-6964-5p      | 0.286781  | -0.0439091 | 0.441274 | -0.0995054 | 0.920737 |
| mmu-miR-223-5p       | 71.1821   | -0.0445385 | 0.44885  | -0.099228  | 0.920957 |
| mmu-miR-3102-5p.2-5p | 4.82794   | 0.0727896  | 0.740208 | 0.0983367  | 0.921665 |
| mmu-miR-8113         | 0.50258   | -0.044345  | 0.453338 | -0.0978189 | 0.922076 |
| mmu-miR-483-3p       | 24.4628   | -0.0695443 | 0.729426 | -0.0953411 | 0.924044 |
| mmu-miR-455-5p       | 11.8394   | -0.0694538 | 0.741105 | -0.0937166 | 0.925334 |
| mmu-miR-292a-5p      | 0.0839244 | 0.0359164  | 0.385966 | 0.0930558  | 0.925859 |
| mmu-miR-3085-3p      | 0.0839244 | 0.0359164  | 0.385966 | 0.0930558  | 0.925859 |
| mmu-miR-3086-5p      | 0.0839244 | 0.0359164  | 0.385966 | 0.0930558  | 0.925859 |
| mmu-miR-3104-5p      | 0.0839244 | 0.0359164  | 0.385966 | 0.0930558  | 0.925859 |
| mmu-miR-7025-3p      | 0.0839244 | 0.0359164  | 0.385966 | 0.0930558  | 0.925859 |
| mmu-miR-7081-3p      | 0.0839244 | 0.0359164  | 0.385966 | 0.0930558  | 0.925859 |
| mmu-miR-7234-5p      | 0.0839244 | 0.0359164  | 0.385966 | 0.0930558  | 0.925859 |
| mmu-miR-7659-5p      | 0.0839244 | 0.0359164  | 0.385966 | 0.0930558  | 0.925859 |
| mmu-miR-3620-5p      | 1.45511   | -0.0631001 | 0.684825 | -0.0921405 | 0.926586 |
| mmu-miR-133b-5p      | 0.153746  | 0.0354218  | 0.38652  | 0.0916429  | 0.926982 |
| mmu-miR-3058-5p      | 0.153746  | 0.0354218  | 0.38652  | 0.0916429  | 0.926982 |
| mmu-miR-666-5p       | 0.153746  | 0.0354218  | 0.38652  | 0.0916429  | 0.926982 |
| mmu-miR-703          | 0.153746  | 0.0354218  | 0.38652  | 0.0916429  | 0.926982 |

|                   |           |           |          |           |          |
|-------------------|-----------|-----------|----------|-----------|----------|
| mmu-miR-717       | 0.153746  | 0.0354218 | 0.38652  | 0.0916429 | 0.926982 |
| mmu-miR-3113-5p   | 0.153746  | 0.0354218 | 0.38652  | 0.0916429 | 0.926982 |
| mmu-miR-6414      | 0.153746  | 0.0354218 | 0.38652  | 0.0916429 | 0.926982 |
| mmu-miR-6938-5p   | 0.153746  | 0.0354218 | 0.38652  | 0.0916429 | 0.926982 |
| mmu-miR-6940-3p   | 0.153746  | 0.0354218 | 0.38652  | 0.0916429 | 0.926982 |
| mmu-miR-6972-3p   | 0.153746  | 0.0354218 | 0.38652  | 0.0916429 | 0.926982 |
| mmu-miR-7117-5p   | 0.153746  | 0.0354218 | 0.38652  | 0.0916429 | 0.926982 |
| mmu-miR-7222-5p   | 0.153746  | 0.0354218 | 0.38652  | 0.0916429 | 0.926982 |
| mmu-miR-7675-3p   | 0.153746  | 0.0354218 | 0.38652  | 0.0916429 | 0.926982 |
| mmu-miR-292a-3p   | 0.115773  | 0.0354218 | 0.38652  | 0.0916429 | 0.926982 |
| mmu-miR-293-5p    | 0.115773  | 0.0354218 | 0.38652  | 0.0916429 | 0.926982 |
| mmu-miR-375-5p    | 0.115773  | 0.0354218 | 0.38652  | 0.0916429 | 0.926982 |
| mmu-miR-466h-5p   | 0.115773  | 0.0354218 | 0.38652  | 0.0916429 | 0.926982 |
| mmu-miR-1982-5p   | 0.115773  | 0.0354218 | 0.38652  | 0.0916429 | 0.926982 |
| mmu-miR-3080-3p   | 0.115773  | 0.0354218 | 0.38652  | 0.0916429 | 0.926982 |
| mmu-miR-5617-3p   | 0.115773  | 0.0354218 | 0.38652  | 0.0916429 | 0.926982 |
| mmu-miR-6404      | 0.115773  | 0.0354218 | 0.38652  | 0.0916429 | 0.926982 |
| mmu-miR-6537-3p   | 0.115773  | 0.0354218 | 0.38652  | 0.0916429 | 0.926982 |
| mmu-miR-6976-5p   | 0.115773  | 0.0354218 | 0.38652  | 0.0916429 | 0.926982 |
| mmu-miR-7219-5p   | 0.115773  | 0.0354218 | 0.38652  | 0.0916429 | 0.926982 |
| mmu-miR-7223-5p   | 0.115773  | 0.0354218 | 0.38652  | 0.0916429 | 0.926982 |
| mmu-miR-196a-1-3p | 0.0999775 | 0.0354218 | 0.38652  | 0.0916429 | 0.926982 |
| mmu-miR-351-3p    | 0.0999775 | 0.0354218 | 0.38652  | 0.0916429 | 0.926982 |
| mmu-miR-302c-3p   | 0.0999775 | 0.0354218 | 0.38652  | 0.0916429 | 0.926982 |
| mmu-miR-761       | 0.0999775 | 0.0354218 | 0.38652  | 0.0916429 | 0.926982 |
| mmu-miR-146b-3p   | 0.0999775 | 0.0354218 | 0.38652  | 0.0916429 | 0.926982 |
| mmu-miR-669a-3-3p | 0.0999775 | 0.0354218 | 0.38652  | 0.0916429 | 0.926982 |
| mmu-miR-741-3p    | 0.0999775 | 0.0354218 | 0.38652  | 0.0916429 | 0.926982 |
| mmu-miR-1956      | 0.0999775 | 0.0354218 | 0.38652  | 0.0916429 | 0.926982 |
| mmu-miR-5046      | 0.0999775 | 0.0354218 | 0.38652  | 0.0916429 | 0.926982 |
| mmu-miR-5710      | 0.0999775 | 0.0354218 | 0.38652  | 0.0916429 | 0.926982 |
| mmu-miR-6393      | 0.0999775 | 0.0354218 | 0.38652  | 0.0916429 | 0.926982 |
| mmu-miR-6403      | 0.0999775 | 0.0354218 | 0.38652  | 0.0916429 | 0.926982 |
| mmu-miR-6540-3p   | 0.0999775 | 0.0354218 | 0.38652  | 0.0916429 | 0.926982 |
| mmu-miR-6901-3p   | 0.0999775 | 0.0354218 | 0.38652  | 0.0916429 | 0.926982 |
| mmu-miR-6950-3p   | 0.0999775 | 0.0354218 | 0.38652  | 0.0916429 | 0.926982 |
| mmu-miR-7213-5p   | 0.0999775 | 0.0354218 | 0.38652  | 0.0916429 | 0.926982 |
| mmu-miR-7236-5p   | 0.0999775 | 0.0354218 | 0.38652  | 0.0916429 | 0.926982 |
| mmu-miR-124-5p    | 0.102627  | 0.0353287 | 0.386624 | 0.0913775 | 0.927193 |
| mmu-miR-466d-5p   | 0.102627  | 0.0353287 | 0.386624 | 0.0913775 | 0.927193 |
| mmu-miR-3090-3p   | 0.102627  | 0.0353287 | 0.386624 | 0.0913775 | 0.927193 |
| mmu-miR-344f-3p   | 0.102627  | 0.0353287 | 0.386624 | 0.0913775 | 0.927193 |
| mmu-miR-5709-3p   | 0.102627  | 0.0353287 | 0.386624 | 0.0913775 | 0.927193 |
| mmu-miR-6379      | 0.102627  | 0.0353287 | 0.386624 | 0.0913775 | 0.927193 |
| mmu-miR-6382      | 0.102627  | 0.0353287 | 0.386624 | 0.0913775 | 0.927193 |
| mmu-miR-7021-3p   | 0.102627  | 0.0353287 | 0.386624 | 0.0913775 | 0.927193 |
| mmu-miR-7038-5p   | 0.102627  | 0.0353287 | 0.386624 | 0.0913775 | 0.927193 |
| mmu-miR-7067-5p   | 0.102627  | 0.0353287 | 0.386624 | 0.0913775 | 0.927193 |



|                   |           |            |          |            |          |
|-------------------|-----------|------------|----------|------------|----------|
| mmu-miR-9768-5p   | 0.102627  | 0.0353287  | 0.386624 | 0.0913775  | 0.927193 |
| mmu-miR-9769-5p   | 0.102627  | 0.0353287  | 0.386624 | 0.0913775  | 0.927193 |
| mmu-miR-106a-3p   | 0.0992934 | 0.0353287  | 0.386624 | 0.0913775  | 0.927193 |
| mmu-miR-412-5p    | 0.0992934 | 0.0353287  | 0.386624 | 0.0913775  | 0.927193 |
| mmu-miR-463-5p    | 0.0992934 | 0.0353287  | 0.386624 | 0.0913775  | 0.927193 |
| mmu-miR-1298-5p   | 0.0992934 | 0.0353287  | 0.386624 | 0.0913775  | 0.927193 |
| mmu-miR-764-3p    | 0.0992934 | 0.0353287  | 0.386624 | 0.0913775  | 0.927193 |
| mmu-miR-876-3p    | 0.0992934 | 0.0353287  | 0.386624 | 0.0913775  | 0.927193 |
| mmu-miR-2139      | 0.0992934 | 0.0353287  | 0.386624 | 0.0913775  | 0.927193 |
| mmu-miR-3070-2-3p | 0.0992934 | 0.0353287  | 0.386624 | 0.0913775  | 0.927193 |
| mmu-miR-344b-5p   | 0.0992934 | 0.0353287  | 0.386624 | 0.0913775  | 0.927193 |
| mmu-miR-21c       | 0.0992934 | 0.0353287  | 0.386624 | 0.0913775  | 0.927193 |
| mmu-miR-32-5p     | 20.35     | 0.0587682  | 0.651049 | 0.0902669  | 0.928075 |
| mmu-miR-192-3p    | 3.23588   | -0.0569939 | 0.631403 | -0.0902656 | 0.928076 |
| mmu-miR-300-5p    | 0.0878482 | 0.0361974  | 0.402331 | 0.089969   | 0.928312 |
| mmu-miR-487b-5p   | 0.0878482 | 0.0361974  | 0.402331 | 0.089969   | 0.928312 |
| mmu-miR-669d-3p   | 0.0878482 | 0.0361974  | 0.402331 | 0.089969   | 0.928312 |
| mmu-miR-7237-3p   | 2.59578   | 0.0511585  | 0.57615  | 0.0887938  | 0.929246 |
| mmu-miR-3471      | 0.957156  | -0.0404362 | 0.473754 | -0.0853528 | 0.931981 |
| mmu-miR-194-2-3p  | 0.602558  | -0.0389275 | 0.45612  | -0.0853448 | 0.931987 |
| mmu-miR-181a-2-3p | 1.57554   | -0.0615598 | 0.721357 | -0.0853389 | 0.931992 |
| mmu-miR-705       | 1.65658   | 0.0570282  | 0.68866  | 0.0828104  | 0.934002 |
| mmu-miR-9-5p      | 5.61396   | 0.0577428  | 0.708822 | 0.081463   | 0.935074 |
| mmu-miR-6412      | 15.8704   | -0.0586437 | 0.726488 | -0.0807221 | 0.935663 |
| mmu-miR-339-5p    | 284.602   | -0.0197404 | 0.25014  | -0.0789173 | 0.937098 |
| mmu-miR-212-3p    | 13.9957   | -0.054708  | 0.741022 | -0.0738277 | 0.941148 |
| mmu-miR-7032-5p   | 0.464595  | -0.0332533 | 0.451663 | -0.0736241 | 0.941309 |
| mmu-miR-1839-5p   | 272.304   | 0.0168875  | 0.231758 | 0.072867   | 0.941912 |
| mmu-miR-7080-5p   | 0.645832  | 0.0331987  | 0.457991 | 0.0724877  | 0.942214 |
| mmu-miR-6239      | 3.14164   | -0.0531012 | 0.734741 | -0.072272  | 0.942385 |
| mmu-miR-216b-5p   | 5.88238   | 0.0466512  | 0.676439 | 0.0689659  | 0.945017 |
| mmu-miR-142a-3p   | 9.76489   | 0.0486557  | 0.736265 | 0.0660845  | 0.947311 |
| mmu-miR-3100-5p   | 11.5598   | 0.0427667  | 0.647879 | 0.0660103  | 0.94737  |
| mmu-miR-140-3p    | 6630.97   | 0.0141054  | 0.215966 | 0.065313   | 0.947925 |
| mmu-miR-7033-5p   | 0.187826  | 0.0272885  | 0.423719 | 0.0644023  | 0.94865  |
| mmu-miR-363-3p    | 2.16002   | -0.0391574 | 0.613756 | -0.0637996 | 0.94913  |
| mmu-miR-6971-5p   | 1.69827   | -0.0311098 | 0.494915 | -0.0628589 | 0.949879 |
| mmu-miR-3077-3p   | 9.32561   | 0.0450267  | 0.738598 | 0.0609625  | 0.951389 |
| mmu-miR-23b-3p    | 91.2867   | -0.028105  | 0.463146 | -0.0606828 | 0.951612 |
| mmu-miR-15b-3p    | 176.166   | 0.0155916  | 0.271356 | 0.057458   | 0.95418  |
| mmu-miR-7051-5p   | 1.58655   | -0.0404498 | 0.712936 | -0.0567369 | 0.954755 |
| mmu-miR-215-3p    | 50.7782   | -0.0278143 | 0.493223 | -0.056393  | 0.955029 |
| mmu-miR-6344      | 0.695063  | 0.0322603  | 0.572477 | 0.0563521  | 0.955061 |
| mmu-miR-1970      | 17.256    | -0.03982   | 0.727948 | -0.0547017 | 0.956376 |
| mmu-miR-96-5p     | 0.183218  | 0.0206042  | 0.409132 | 0.0503607  | 0.959835 |
| mmu-miR-544-5p    | 0.507425  | 0.024001   | 0.477819 | 0.0502304  | 0.959939 |
| mmu-miR-208a-3p   | 3.27756   | -0.0310306 | 0.630689 | -0.049201  | 0.960759 |
| mmu-miR-881-5p    | 1.72449   | -0.03511   | 0.716474 | -0.0490039 | 0.960916 |

|                   |           |            |          |            |          |
|-------------------|-----------|------------|----------|------------|----------|
| mmu-miR-30b-3p    | 2.46143   | 0.031189   | 0.643122 | 0.0484962  | 0.961321 |
| mmu-miR-6966-3p   | 0.340887  | 0.0212015  | 0.440943 | 0.0480823  | 0.961651 |
| mmu-miR-466j      | 0.199955  | 0.019738   | 0.410601 | 0.0480709  | 0.96166  |
| mmu-miR-1948-3p   | 0.199955  | 0.019738   | 0.410601 | 0.0480709  | 0.96166  |
| mmu-miR-1962      | 0.199955  | 0.019738   | 0.410601 | 0.0480709  | 0.96166  |
| mmu-miR-7662-3p   | 0.199955  | 0.019738   | 0.410601 | 0.0480709  | 0.96166  |
| mmu-miR-1933-3p   | 0.198587  | 0.0194887  | 0.411017 | 0.0474159  | 0.962182 |
| mmu-miR-6992-5p   | 0.201921  | 0.0192624  | 0.411389 | 0.0468228  | 0.962654 |
| mmu-miR-330-3p    | 25.744    | -0.0260311 | 0.557355 | -0.0467048 | 0.962749 |
| mmu-miR-362-5p    | 0.691542  | 0.0211954  | 0.457999 | 0.0462783  | 0.963088 |
| mmu-miR-6988-3p   | 13.5586   | -0.0340735 | 0.738237 | -0.0461552 | 0.963187 |
| mmu-miR-5620-5p   | 0.231547  | 0.0186508  | 0.414737 | 0.0449702  | 0.964131 |
| mmu-miR-6335      | 0.231547  | 0.0186508  | 0.414737 | 0.0449702  | 0.964131 |
| mmu-miR-1249-5p   | 0.787433  | 0.0232078  | 0.519562 | 0.0446681  | 0.964372 |
| mmu-miR-7034-3p   | 2.01585   | -0.0326224 | 0.731248 | -0.0446119 | 0.964417 |
| mmu-miR-7217-5p   | 0.199271  | 0.0185393  | 0.415576 | 0.044611   | 0.964417 |
| mmu-miR-6398      | 0.202605  | 0.0184693  | 0.416092 | 0.0443875  | 0.964596 |
| mmu-miR-6896-5p   | 0.253723  | 0.0183416  | 0.417013 | 0.0439834  | 0.964918 |
| mmu-miR-6899-5p   | 0.215067  | 0.018221   | 0.41786  | 0.0436055  | 0.965219 |
| mmu-miR-6355      | 3.16102   | -0.031247  | 0.733644 | -0.0425916 | 0.966027 |
| mmu-miR-190b-5p   | 5.2698    | 0.0311774  | 0.737479 | 0.0422756  | 0.966279 |
| mmu-miR-6377      | 0.562565  | -0.0193024 | 0.463679 | -0.0416288 | 0.966795 |
| mmu-miR-6953-5p   | 1.49377   | 0.0253752  | 0.61323  | 0.0413796  | 0.966993 |
| mmu-miR-6942-5p   | 1.17256   | 0.0232091  | 0.575861 | 0.0403033  | 0.967851 |
| mmu-miR-669g      | 0.299932  | 0.0166923  | 0.427143 | 0.0390789  | 0.968827 |
| mmu-miR-1964-5p   | 0.299932  | 0.0166923  | 0.427143 | 0.0390789  | 0.968827 |
| mmu-miR-7674-5p   | 0.299932  | 0.0166923  | 0.427143 | 0.0390789  | 0.968827 |
| mmu-miR-193a-3p   | 0.307882  | 0.0165015  | 0.428153 | 0.038541   | 0.969256 |
| mmu-miR-7a-2-3p   | 2.43615   | -0.0238727 | 0.627802 | -0.0380258 | 0.969667 |
| mmu-miR-582-5p    | 0.412598  | 0.0179848  | 0.473738 | 0.0379636  | 0.969717 |
| mmu-miR-668-5p    | 0.283879  | 0.016087   | 0.430262 | 0.0373888  | 0.970175 |
| mmu-miR-3547-5p   | 5.36204   | 0.0258566  | 0.718712 | 0.0359764  | 0.971301 |
| mmu-miR-6973b-3p  | 0.318378  | 0.0154067  | 0.433495 | 0.0355407  | 0.971649 |
| mmu-miR-5621-3p   | 0.385292  | 0.0153611  | 0.433703 | 0.0354184  | 0.971746 |
| mmu-miR-1907      | 0.321028  | 0.0153131  | 0.433921 | 0.03529    | 0.971848 |
| mmu-miR-219a-1-3p | 5.49971   | 0.0235937  | 0.669252 | 0.0352538  | 0.971877 |
| mmu-miR-383-5p    | 0.336964  | 0.0150793  | 0.434964 | 0.0346679  | 0.972345 |
| mmu-miR-7026-3p   | 0.355667  | 0.014731   | 0.436469 | 0.0337503  | 0.973076 |
| mmu-miR-7084-5p   | 2.34401   | 0.0191838  | 0.57886  | 0.0331406  | 0.973562 |
| mmu-miR-7674-3p   | 0.351751  | 0.0143847  | 0.437914 | 0.0328481  | 0.973796 |
| mmu-miR-7037-5p   | 1.18745   | 0.0199385  | 0.611987 | 0.03258    | 0.97401  |
| mmu-miR-6907-3p   | 0.671812  | 0.0153237  | 0.481906 | 0.0317982  | 0.974633 |
| mmu-miR-31-5p     | 26.1175   | -0.0225418 | 0.731924 | -0.0307981 | 0.975431 |
| mmu-miR-467e-5p   | 0.0958393 | 0.0118956  | 0.404442 | 0.0294123  | 0.976536 |
| mmu-miR-6383      | 0.0958393 | 0.0118956  | 0.404442 | 0.0294123  | 0.976536 |
| mmu-miR-6390      | 0.0958393 | 0.0118956  | 0.404442 | 0.0294123  | 0.976536 |
| mmu-miR-30c-1-3p  | 2.47654   | 0.0215233  | 0.73319  | 0.0293556  | 0.976581 |
| mmu-miR-6418-5p   | 0.826774  | 0.0145985  | 0.505252 | 0.0288936  | 0.976949 |

|                  |          |              |          |             |          |
|------------------|----------|--------------|----------|-------------|----------|
| mmu-miR-6993-3p  | 0.22376  | 0.0117694    | 0.430665 | 0.0273285   | 0.978198 |
| mmu-miR-6897-3p  | 0.415516 | 0.0121658    | 0.448999 | 0.0270953   | 0.978384 |
| mmu-miR-669n     | 5.77149  | -0.0167999   | 0.740039 | -0.0227014  | 0.981888 |
| mmu-miR-883a-5p  | 0.103693 | -0.00905672  | 0.406225 | -0.0222948  | 0.982213 |
| mmu-miR-873a-5p  | 0.103693 | -0.00905672  | 0.406225 | -0.0222948  | 0.982213 |
| mmu-miR-330-5p   | 8.63739  | 0.0162783    | 0.737595 | 0.0220695   | 0.982393 |
| mmu-miR-7062-5p  | 0.683806 | -0.0100541   | 0.459464 | -0.0218821  | 0.982542 |
| mmu-miR-6365     | 0.63563  | 0.00983475   | 0.453432 | 0.0216896   | 0.982696 |
| mmu-let-7f-2-3p  | 20.2949  | -0.0145779   | 0.71792  | -0.0203058  | 0.983799 |
| mmu-miR-770-5p   | 0.211613 | 0.00833118   | 0.426972 | 0.0195122   | 0.984432 |
| mmu-miR-344f-5p  | 0.211613 | 0.00833118   | 0.426972 | 0.0195122   | 0.984432 |
| mmu-miR-410-5p   | 0.430326 | -0.00878906  | 0.451472 | -0.0194676  | 0.984468 |
| mmu-miR-7048-5p  | 1.01961  | 0.00815957   | 0.458024 | 0.0178147   | 0.985787 |
| mmu-miR-6375     | 0.257438 | -0.0074112   | 0.431368 | -0.0171807  | 0.986292 |
| mmu-miR-1258-3p  | 4.55943  | -0.00997695  | 0.601101 | -0.0165978  | 0.986757 |
| mmu-miR-6396     | 5.13159  | 0.01045      | 0.713484 | 0.0146464   | 0.988314 |
| mmu-miR-7036a-5p | 0.440435 | -0.00641556  | 0.451265 | -0.0142168  | 0.988657 |
| mmu-miR-3154     | 0.355466 | -0.00552156  | 0.442439 | -0.0124798  | 0.990043 |
| mmu-miR-6417     | 0.572258 | 0.00545042   | 0.456261 | 0.0119458   | 0.990469 |
| mmu-miR-6999-5p  | 0.826153 | 0.00527085   | 0.579762 | 0.0090914   | 0.992746 |
| mmu-miR-7237-5p  | 0.688865 | -0.00479147  | 0.532456 | -0.00899882 | 0.99282  |
| mmu-miR-3091-5p  | 6.59133  | -0.00170549  | 0.689845 | -0.00247228 | 0.998027 |
| mmu-miR-7074-3p  | 1.56334  | 0.00108101   | 0.60678  | 0.00178155  | 0.998579 |
| mmu-miR-5116     | 2.67956  | -0.000971565 | 0.624117 | -0.0015567  | 0.998758 |
| mmu-miR-124-3p   | NA       | NA           | NA       | NA          | NA       |
| mmu-miR-9-3p     | 1.00346  | -0.00299541  | 0.464345 | -0.00645083 | NA       |
| mmu-miR-134-3p   | NA       | NA           | NA       | NA          | NA       |
| mmu-miR-135a-5p  | 0.857565 | 0.377693     | 0.533401 | 0.708085    | NA       |
| mmu-miR-138-5p   | 7.71863  | 0.733309     | 0.678984 | 1.08001     | NA       |
| mmu-miR-138-2-3p | NA       | NA           | NA       | NA          | NA       |
| mmu-miR-153-5p   | NA       | NA           | NA       | NA          | NA       |
| mmu-miR-153-3p   | NA       | NA           | NA       | NA          | NA       |
| mmu-miR-10b-3p   | 1.79308  | -0.201415    | 0.531793 | -0.378746   | NA       |
| mmu-miR-184-5p   | NA       | NA           | NA       | NA          | NA       |
| mmu-miR-187-5p   | 0.701616 | -0.637995    | 0.455811 | -1.39969    | NA       |
| mmu-miR-188-5p   | 2.22113  | 0.0178951    | 0.570359 | 0.0313752   | NA       |
| mmu-miR-188-3p   | NA       | NA           | NA       | NA          | NA       |
| mmu-miR-190a-3p  | NA       | NA           | NA       | NA          | NA       |
| mmu-miR-194-1-3p | 1.44909  | -0.152873    | 0.538332 | -0.283975   | NA       |
| mmu-miR-201-5p   | 0.680665 | 0.498546     | 0.456847 | 1.09127     | NA       |
| mmu-miR-201-3p   | NA       | NA           | NA       | NA          | NA       |
| mmu-miR-202-5p   | 1.90375  | 0.100523     | 0.496508 | 0.20246     | NA       |
| mmu-miR-204-3p   | 1.29682  | 0.187084     | 0.53238  | 0.351412    | NA       |
| mmu-miR-205-3p   | 0.788706 | 0.555019     | 0.45955  | 1.20774     | NA       |
| mmu-miR-143-5p   | 0.323993 | 0.585845     | 0.44163  | 1.32655     | NA       |
| mmu-miR-290a-5p  | NA       | NA           | NA       | NA          | NA       |
| mmu-miR-290a-3p  | NA       | NA           | NA       | NA          | NA       |
| mmu-miR-293-3p   | NA       | NA           | NA       | NA          | NA       |

|                       |          |    |            |          |               |
|-----------------------|----------|----|------------|----------|---------------|
| mmu-miR-294-5p        | NA       | NA | NA         | NA       | NA            |
| mmu-miR-295-5p        | NA       | NA | NA         | NA       | NA            |
| mmu-miR-298-3p        | NA       | NA | NA         | NA       | NA            |
| mmu-let-7a-2-3p       | NA       | NA | NA         | NA       | NA            |
| mmu-let-7c-2-3p       | NA       | NA | NA         | NA       | NA            |
| mmu-miR-26a-1-3p      | 0.93931  |    | 0.00710912 | 0.46078  | 0.0154284 NA  |
| <b>mmu-miR-29c-5p</b> | 1.42596  |    | -0.180942  | 0.563974 | -0.320833 NA  |
| mmu-miR-92a-2-5p      | 1.72944  |    | 0.97192    | 0.655634 | 1.48241 NA    |
| mmu-miR-96-3p         | NA       | NA | NA         | NA       | NA            |
| mmu-miR-34a-3p        | NA       | NA | NA         | NA       | NA            |
| mmu-miR-103-1-5p      | NA       | NA | NA         | NA       | NA            |
| mmu-miR-103-2-5p      | 0.672933 |    | 0.650451   | 0.456047 | 1.42628 NA    |
| mmu-miR-323-5p        | 0.803711 |    | -0.649034  | 0.457808 | -1.4177 NA    |
| mmu-miR-325-5p        | NA       | NA | NA         | NA       | NA            |
| mmu-miR-326-5p        | NA       | NA | NA         | NA       | NA            |
| mmu-miR-328-5p        | 4.33245  |    | 0.363067   | 0.629135 | 0.57709 NA    |
| mmu-miR-337-3p        | 1.12519  |    | 0.00674973 | 0.461569 | 0.0146235 NA  |
| mmu-miR-344-5p        | NA       | NA | NA         | NA       | NA            |
| mmu-miR-350-5p        | NA       | NA | NA         | NA       | NA            |
| mmu-miR-135b-3p       | NA       | NA | NA         | NA       | NA            |
| mmu-miR-101b-3p       | NA       | NA | NA         | NA       | NA            |
| mmu-miR-107-5p        | NA       | NA | NA         | NA       | NA            |
| mmu-miR-19a-5p        | NA       | NA | NA         | NA       | NA            |
| mmu-miR-100-3p        | 3.03621  |    | -0.0326142 | 0.549432 | -0.0593599 NA |
| mmu-miR-216a-5p       | NA       | NA | NA         | NA       | NA            |
| mmu-miR-218-2-3p      | NA       | NA | NA         | NA       | NA            |
| mmu-miR-219a-5p       | 1.39011  |    | 0.00644237 | 0.462307 | 0.0139352 NA  |
| mmu-miR-33-5p         | 1.86977  |    | 0.712737   | 0.467793 | 1.52362 NA    |
| mmu-miR-33-3p         | 0.821019 |    | 0.00951415 | 0.454346 | 0.0209403 NA  |
| mmu-miR-224-5p        | 18.0222  |    | 1.29124    | 0.739284 | 1.74661 NA    |
| mmu-miR-199b-3p       | NA       | NA | NA         | NA       | NA            |
| mmu-miR-19b-1-5p      | NA       | NA | NA         | NA       | NA            |
| mmu-miR-92a-1-5p      | NA       | NA | NA         | NA       | NA            |
| mmu-miR-181b-1-3p     | NA       | NA | NA         | NA       | NA            |
| mmu-miR-128-2-5p      | 1.13608  |    | -0.335624  | 0.463863 | -0.72354 NA   |
| mmu-miR-376a-5p       | 0.89364  |    | 0.00895049 | 0.455912 | 0.019632 NA   |
| mmu-miR-376a-3p       | NA       | NA | NA         | NA       | NA            |
| mmu-miR-380-5p        | NA       | NA | NA         | NA       | NA            |
| mmu-miR-380-3p        | 0.718392 |    | 0.0104037  | 0.451762 | 0.0230291 NA  |
| mmu-miR-133b-3p       | 3.6178   |    | 0.395083   | 0.679303 | 0.581601 NA   |
| mmu-miR-181b-2-3p     | 1.24404  |    | 0.155008   | 0.466524 | 0.332262 NA   |
| mmu-miR-384-3p        | 0.540285 |    | -0.319513  | 0.45422  | -0.703432 NA  |
| mmu-miR-411-3p        | 1.24883  |    | 0.0855962  | 0.564862 | 0.151535 NA   |
| mmu-miR-412-3p        | NA       | NA | NA         | NA       | NA            |
| mmu-miR-431-3p        | 0.67777  |    | 0.383073   | 0.457388 | 0.837524 NA   |
| mmu-miR-433-5p        | NA       | NA | NA         | NA       | NA            |
| mmu-miR-448-5p        | NA       | NA | NA         | NA       | NA            |
| mmu-miR-429-5p        | NA       | NA | NA         | NA       | NA            |

|                   |          |    |            |          |               |
|-------------------|----------|----|------------|----------|---------------|
| mmu-miR-449a-3p   | NA       | NA | NA         | NA       | NA            |
| mmu-miR-450a-5p   | 0.543188 |    | -0.50852   | 0.452495 | -1.12381 NA   |
| mmu-miR-450a-1-3p | 0.346881 |    | -0.564515  | 0.44116  | -1.27962 NA   |
| mmu-miR-465a-3p   | NA       | NA | NA         | NA       | NA            |
| mmu-miR-466a-5p   | 0.28704  |    | -0.538696  | 0.435383 | -1.23729 NA   |
| mmu-miR-466a-3p   | 1.16762  |    | 0.00670181 | 0.461685 | 0.014516 NA   |
| mmu-miR-467a-5p   | NA       | NA | NA         | NA       | NA            |
| mmu-miR-468-5p    | NA       | NA | NA         | NA       | NA            |
| mmu-miR-468-3p    | NA       | NA | NA         | NA       | NA            |
| mmu-miR-470-5p    | 1.5014   |    | 0.00498029 | 0.490865 | 0.0101459 NA  |
| mmu-miR-470-3p    | NA       | NA | NA         | NA       | NA            |
| mmu-miR-471-5p    | 0.231424 |    | 0.547257   | 0.431814 | 1.26734 NA    |
| mmu-miR-471-3p    | NA       | NA | NA         | NA       | NA            |
| mmu-miR-546       | NA       | NA | NA         | NA       | NA            |
| mmu-miR-540-5p    | NA       | NA | NA         | NA       | NA            |
| mmu-miR-543-5p    | 1.29971  |    | 0.00681945 | 0.461399 | 0.0147799 NA  |
| mmu-miR-539-5p    | 1.26412  |    | -0.140475  | 0.495076 | -0.283743 NA  |
| mmu-miR-547-5p    | NA       | NA | NA         | NA       | NA            |
| mmu-miR-367-5p    | NA       | NA | NA         | NA       | NA            |
| mmu-miR-367-3p    | NA       | NA | NA         | NA       | NA            |
| mmu-miR-376c-5p   | NA       | NA | NA         | NA       | NA            |
| mmu-miR-369-5p    | 1.12718  |    | 0.337948   | 0.46529  | 0.726315 NA   |
| mmu-miR-20b-3p    | NA       | NA | NA         | NA       | NA            |
| mmu-miR-450a-2-3p | NA       | NA | NA         | NA       | NA            |
| mmu-miR-291b-5p   | NA       | NA | NA         | NA       | NA            |
| mmu-miR-302b-3p   | NA       | NA | NA         | NA       | NA            |
| mmu-miR-302c-5p   | NA       | NA | NA         | NA       | NA            |
| mmu-miR-302d-5p   | NA       | NA | NA         | NA       | NA            |
| mmu-miR-302d-3p   | NA       | NA | NA         | NA       | NA            |
| mmu-miR-1224-3p   | 1.75581  |    | -0.335509  | 0.561985 | -0.597007 NA  |
| mmu-miR-1247-3p   | 0.615834 |    | 0.434992   | 0.456891 | 0.952069 NA   |
| mmu-miR-301b-5p   | NA       | NA | NA         | NA       | NA            |
| mmu-miR-675-3p    | 0.740557 |    | 0.661703   | 0.458318 | 1.44376 NA    |
| mmu-miR-216b-3p   | 1.31617  |    | 0.0929441  | 0.46317  | 0.200669 NA   |
| mmu-miR-758-5p    | NA       | NA | NA         | NA       | NA            |
| mmu-miR-758-3p    | NA       | NA | NA         | NA       | NA            |
| mmu-miR-1264-5p   | NA       | NA | NA         | NA       | NA            |
| mmu-miR-551b-5p   | NA       | NA | NA         | NA       | NA            |
| mmu-miR-665-5p    | NA       | NA | NA         | NA       | NA            |
| mmu-miR-667-5p    | 1.39781  |    | -0.226614  | 0.502071 | -0.451359 NA  |
| mmu-miR-3475-5p   | NA       | NA | NA         | NA       | NA            |
| mmu-miR-3475-3p   | NA       | NA | NA         | NA       | NA            |
| mmu-miR-802-3p    | 1.58701  |    | -0.0306942 | 0.470511 | -0.0652359 NA |
| mmu-miR-670-3p    | NA       | NA | NA         | NA       | NA            |
| mmu-miR-1298-3p   | NA       | NA | NA         | NA       | NA            |
| mmu-miR-764-5p    | NA       | NA | NA         | NA       | NA            |
| mmu-miR-3099-5p   | NA       | NA | NA         | NA       | NA            |
| mmu-miR-3099-3p   | 2.81233  |    | 0.0808455  | 0.523548 | 0.154419 NA   |

|                   |          |           |          |           |    |
|-------------------|----------|-----------|----------|-----------|----|
| mmu-miR-3106-5p   | NA       | NA        | NA       | NA        | NA |
| mmu-miR-496a-5p   | NA       | NA        | NA       | NA        | NA |
| mmu-miR-496a-3p   | 0.468184 | 0.36121   | 0.45239  | 0.79845   | NA |
| mmu-miR-344d-2-5p | 0.623451 | -0.628255 | 0.454007 | -1.3838   | NA |
| mmu-miR-488-3p    | NA       | NA        | NA       | NA        | NA |
| mmu-miR-677-5p    | 0.207817 | -0.502369 | 0.426643 | -1.17749  | NA |
| mmu-miR-497a-3p   | NA       | NA        | NA       | NA        | NA |
| mmu-miR-680       | NA       | NA        | NA       | NA        | NA |
| mmu-miR-681       | NA       | NA        | NA       | NA        | NA |
| mmu-miR-449c-5p   | NA       | NA        | NA       | NA        | NA |
| mmu-miR-449c-3p   | NA       | NA        | NA       | NA        | NA |
| mmu-miR-683       | NA       | NA        | NA       | NA        | NA |
| mmu-miR-684       | NA       | NA        | NA       | NA        | NA |
| mmu-miR-687       | NA       | NA        | NA       | NA        | NA |
| mmu-miR-688       | NA       | NA        | NA       | NA        | NA |
| mmu-miR-690       | 0.231424 | 0.547257  | 0.431814 | 1.26734   | NA |
| mmu-miR-692       | 0.495545 | -0.604423 | 0.449423 | -1.34489  | NA |
| mmu-miR-693-5p    | NA       | NA        | NA       | NA        | NA |
| mmu-miR-694       | NA       | NA        | NA       | NA        | NA |
| mmu-miR-669b-3p   | 0.753852 | -0.383954 | 0.45954  | -0.835518 | NA |
| mmu-miR-467b-3p   | 1.6093   | -0.636672 | 0.546618 | -1.16475  | NA |
| mmu-miR-297b-5p   | NA       | NA        | NA       | NA        | NA |
| mmu-miR-499-3p    | 0.457197 | -0.597389 | 0.448021 | -1.33339  | NA |
| mmu-miR-696       | NA       | NA        | NA       | NA        | NA |
| mmu-miR-698-5p    | 2.19664  | -0.168778 | 0.559876 | -0.301456 | NA |
| mmu-miR-698-3p    | NA       | NA        | NA       | NA        | NA |
| mmu-miR-701-3p    | NA       | NA        | NA       | NA        | NA |
| mmu-miR-706       | 1.70299  | -0.484289 | 0.50172  | -0.965257 | NA |
| mmu-miR-707       | NA       | NA        | NA       | NA        | NA |
| mmu-miR-709       | NA       | NA        | NA       | NA        | NA |
| mmu-miR-710       | NA       | NA        | NA       | NA        | NA |
| mmu-miR-711       | NA       | NA        | NA       | NA        | NA |
| mmu-miR-712-5p    | 0.578866 | 0.0121076 | 0.446359 | 0.0271252 | NA |
| mmu-miR-712-3p    | 1.31221  | 0.18181   | 0.471605 | 0.385514  | NA |
| mmu-miR-713       | NA       | NA        | NA       | NA        | NA |
| mmu-miR-500-5p    | 0.495545 | -0.604423 | 0.449423 | -1.34489  | NA |
| mmu-miR-501-5p    | 1.06806  | -0.241821 | 0.464415 | -0.5207   | NA |
| mmu-miR-505-5p    | 0.378792 | -0.406921 | 0.446419 | -0.911522 | NA |
| mmu-miR-718       | NA       | NA        | NA       | NA        | NA |
| mmu-miR-652-5p    | 0.247772 | -0.522366 | 0.431539 | -1.21047  | NA |
| mmu-miR-490-3p    | 1.3449   | 0.467047  | 0.466206 | 1.0018    | NA |
| mmu-miR-615-5p    | 1.87835  | 0.345213  | 0.55557  | 0.621368  | NA |
| mmu-miR-804       | NA       | NA        | NA       | NA        | NA |
| mmu-miR-741-5p    | NA       | NA        | NA       | NA        | NA |
| mmu-miR-742-5p    | NA       | NA        | NA       | NA        | NA |
| mmu-miR-743a-5p   | 1.62047  | 0.706127  | 0.46664  | 1.51322   | NA |
| mmu-miR-743b-5p   | NA       | NA        | NA       | NA        | NA |
| mmu-miR-871-3p    | 2.78862  | 1.25497   | 0.576577 | 2.17659   | NA |

|                 |          |    |            |          |            |    |
|-----------------|----------|----|------------|----------|------------|----|
| mmu-miR-879-5p  | 1.15683  |    | 0.536149   | 0.464527 | 1.15418    | NA |
| mmu-miR-879-3p  | 3.19344  |    | 0.238215   | 0.559968 | 0.425407   | NA |
| mmu-miR-880-5p  | NA       | NA | NA         | NA       |            | NA |
| mmu-miR-880-3p  | NA       | NA | NA         | NA       |            | NA |
| mmu-miR-881-3p  | 0.550696 |    | 0.513691   | 0.454653 | 1.12985    | NA |
| mmu-miR-882     | 0.459264 |    | -0.594858  | 0.447512 | -1.32926   | NA |
| mmu-miR-190b-3p | NA       | NA | NA         | NA       |            | NA |
| mmu-miR-105     | NA       | NA | NA         | NA       |            | NA |
| mmu-miR-18b-5p  | 1.66598  |    | -0.355663  | 0.520808 | -0.682906  | NA |
| mmu-miR-18b-3p  | 1.22997  |    | 0.00733781 | 0.460122 | 0.0159475  | NA |
| mmu-miR-297a-3p | NA       | NA | NA         | NA       |            | NA |
| mmu-miR-297c-5p | NA       | NA | NA         | NA       |            | NA |
| mmu-miR-297c-3p | NA       | NA | NA         | NA       |            | NA |
| mmu-miR-327     | NA       | NA | NA         | NA       |            | NA |
| mmu-miR-343     | NA       | NA | NA         | NA       |            | NA |
| mmu-miR-465b-3p | NA       | NA | NA         | NA       |            | NA |
| mmu-miR-465c-5p | 17.755   |    | 1.31699    | 0.624272 | 2.10963    | NA |
| mmu-miR-465c-3p | NA       | NA | NA         | NA       |            | NA |
| mmu-miR-466b-5p | NA       | NA | NA         | NA       |            | NA |
| mmu-miR-466c-5p | 0.457159 |    | -0.269775  | 0.451184 | -0.597927  | NA |
| mmu-miR-466c-3p | NA       | NA | NA         | NA       |            | NA |
| mmu-miR-466e-5p | NA       | NA | NA         | NA       |            | NA |
| mmu-miR-466e-3p | NA       | NA | NA         | NA       |            | NA |
| mmu-miR-466f-5p | 1.23642  |    | -0.0382957 | 0.504862 | -0.0758537 | NA |
| mmu-miR-466h-3p | NA       | NA | NA         | NA       |            | NA |
| mmu-miR-467c-5p | NA       | NA | NA         | NA       |            | NA |
| mmu-miR-467d-5p | 1.36033  |    | 0.15784    | 0.464533 | 0.339782   | NA |
| mmu-miR-467d-3p | NA       | NA | NA         | NA       |            | NA |
| mmu-miR-493-5p  | NA       | NA | NA         | NA       |            | NA |
| mmu-miR-568     | NA       | NA | NA         | NA       |            | NA |
| mmu-miR-654-5p  | NA       | NA | NA         | NA       |            | NA |
| mmu-miR-449b    | NA       | NA | NA         | NA       |            | NA |
| mmu-miR-878-3p  | NA       | NA | NA         | NA       |            | NA |
| mmu-miR-544-3p  | NA       | NA | NA         | NA       |            | NA |
| mmu-miR-598-5p  | 1.49132  |    | -0.174956  | 0.565101 | -0.3096    | NA |
| mmu-miR-653-5p  | NA       | NA | NA         | NA       |            | NA |
| mmu-miR-582-3p  | 2.84542  |    | -0.297864  | 0.513055 | -0.58057   | NA |
| mmu-miR-467e-3p | NA       | NA | NA         | NA       |            | NA |
| mmu-miR-466l-5p | NA       | NA | NA         | NA       |            | NA |
| mmu-miR-669k-3p | NA       | NA | NA         | NA       |            | NA |
| mmu-miR-669d-5p | 0.39991  |    | 0.0146397  | 0.436855 | 0.0335116  | NA |
| mmu-miR-669j    | NA       | NA | NA         | NA       |            | NA |
| mmu-miR-669i    | NA       | NA | NA         | NA       |            | NA |
| mmu-miR-669h-5p | 0.374868 |    | -0.44494   | 0.44519  | -0.999437  | NA |
| mmu-miR-1188-5p | 0.87256  |    | 0.667698   | 0.459501 | 1.4531     | NA |
| mmu-miR-466f    | NA       | NA | NA         | NA       |            | NA |
| mmu-miR-466k    | NA       | NA | NA         | NA       |            | NA |
| mmu-miR-1190    | NA       | NA | NA         | NA       |            | NA |

|                 |          |    |            |          |               |
|-----------------|----------|----|------------|----------|---------------|
| mmu-miR-1193-5p | NA       | NA | NA         | NA       | NA            |
| mmu-miR-1193-3p | NA       | NA | NA         | NA       | NA            |
| mmu-miR-467h    | NA       | NA | NA         | NA       | NA            |
| mmu-miR-1197-5p | NA       | NA | NA         | NA       | NA            |
| mmu-miR-1197-3p | NA       | NA | NA         | NA       | NA            |
| mmu-miR-1198-3p | 1.54304  |    | -0.203911  | 0.479026 | -0.425678 NA  |
| mmu-miR-1199-3p | NA       | NA | NA         | NA       | NA            |
| mmu-miR-1902    | NA       | NA | NA         | NA       | NA            |
| mmu-miR-1897-3p | NA       | NA | NA         | NA       | NA            |
| mmu-miR-1906    | NA       | NA | NA         | NA       | NA            |
| mmu-miR-1896    | 3.2898   |    | -0.0924777 | 0.607956 | -0.152112 NA  |
| mmu-miR-1904    | NA       | NA | NA         | NA       | NA            |
| mmu-miR-1928    | NA       | NA | NA         | NA       | NA            |
| mmu-miR-1929-3p | NA       | NA | NA         | NA       | NA            |
| mmu-miR-1930-3p | NA       | NA | NA         | NA       | NA            |
| mmu-miR-1931    | 0.574079 |    | -0.618179  | 0.452099 | -1.36735 NA   |
| mmu-miR-1936    | 1.53589  |    | -0.0355158 | 0.499964 | -0.0710367 NA |
| mmu-miR-1938    | 5.66948  |    | 1.50388    | 0.717385 | 2.09634 NA    |
| mmu-miR-1943-3p | 2.04664  |    | 0.193986   | 0.560279 | 0.34623 NA    |
| mmu-miR-1947-5p | 1.18364  |    | 0.47244    | 0.484816 | 0.974473 NA   |
| mmu-miR-1948-5p | 2.61673  |    | 0.148529   | 0.624208 | 0.237947 NA   |
| mmu-miR-1949    | NA       | NA | NA         | NA       | NA            |
| mmu-miR-1950    | NA       | NA | NA         | NA       | NA            |
| mmu-miR-669l-3p | 0.28704  |    | -0.538696  | 0.435383 | -1.23729 NA   |
| mmu-miR-669m-5p | NA       | NA | NA         | NA       | NA            |
| mmu-miR-669o-3p | NA       | NA | NA         | NA       | NA            |
| mmu-miR-1952    | NA       | NA | NA         | NA       | NA            |
| mmu-miR-1953    | 0.919116 |    | -0.569643  | 0.46082  | -1.23615 NA   |
| mmu-miR-1955-5p | 1.06907  |    | -0.0412171 | 0.465105 | -0.088619 NA  |
| mmu-miR-1957a   | NA       | NA | NA         | NA       | NA            |
| mmu-miR-1958    | 0.753852 |    | -0.383954  | 0.45954  | -0.835518 NA  |
| mmu-miR-1960    | 0.506752 |    | -0.60795   | 0.450117 | -1.35065 NA   |
| mmu-miR-1961    | NA       | NA | NA         | NA       | NA            |
| mmu-miR-1963    | 1.88912  |    | -0.663405  | 0.554493 | -1.19642 NA   |
| mmu-miR-1966-5p | 0.81379  |    | 0.484816   | 0.460593 | 1.05259 NA    |
| mmu-miR-1966-3p | 2.58617  |    | 0.00591447 | 0.5157   | 0.0114688 NA  |
| mmu-miR-1968-3p | NA       | NA | NA         | NA       | NA            |
| mmu-miR-1969    | NA       | NA | NA         | NA       | NA            |
| mmu-miR-1971    | NA       | NA | NA         | NA       | NA            |
| mmu-miR-1983    | 3.50661  |    | -0.396376  | 0.644632 | -0.614887 NA  |
| mmu-miR-1981-3p | 7.13155  |    | 0.0603481  | 0.473562 | 0.127435 NA   |
| mmu-miR-1982-3p | 0.894337 |    | 0.00851829 | 0.457078 | 0.0186364 NA  |
| mmu-miR-2183    | NA       | NA | NA         | NA       | NA            |
| mmu-miR-599     | NA       | NA | NA         | NA       | NA            |
| mmu-miR-2861    | NA       | NA | NA         | NA       | NA            |
| mmu-miR-3057-5p | 6.25362  |    | 0.171175   | 0.665145 | 0.25735 NA    |
| mmu-miR-3057-3p | 0.70897  |    | -0.41185   | 0.457971 | -0.899293 NA  |
| mmu-miR-1251-3p | NA       | NA | NA         | NA       | NA            |



|                   |          |    |           |          |              |
|-------------------|----------|----|-----------|----------|--------------|
| mmu-miR-3060-5p   | NA       | NA | NA        | NA       | NA           |
| mmu-miR-3062-3p   | NA       | NA | NA        | NA       | NA           |
| mmu-miR-3063-5p   | 0.39991  |    | 0.0146397 | 0.436855 | 0.0335116 NA |
| mmu-miR-3064-3p   | 1.2635   |    | -0.447355 | 0.572306 | -0.781671 NA |
| mmu-miR-3066-3p   | 0.924766 |    | 0.0600279 | 0.463692 | 0.129456 NA  |
| mmu-miR-3067-3p   | 0.658534 |    | -0.430384 | 0.456735 | -0.942304 NA |
| mmu-miR-3069-5p   | 4.7492   |    | 1.34307   | 0.625918 | 2.14577 NA   |
| mmu-miR-3069-3p   | 0.323993 |    | 0.585845  | 0.44163  | 1.32655 NA   |
| mmu-miR-3070-5p   | 0.583014 |    | -0.111255 | 0.450823 | -0.246782 NA |
| mmu-miR-3070-3p   | NA       | NA | NA        | NA       | NA           |
| mmu-miR-3072-3p   | NA       | NA | NA        | NA       | NA           |
| mmu-miR-3073a-3p  | NA       | NA | NA        | NA       | NA           |
| mmu-miR-3075-5p   | NA       | NA | NA        | NA       | NA           |
| mmu-miR-3075-3p   | NA       | NA | NA        | NA       | NA           |
| mmu-miR-3076-5p   | 0.54183  |    | -0.479044 | 0.453029 | -1.05742 NA  |
| mmu-miR-3078-5p   | NA       | NA | NA        | NA       | NA           |
| mmu-miR-3078-3p   | NA       | NA | NA        | NA       | NA           |
| mmu-miR-3079-5p   | NA       | NA | NA        | NA       | NA           |
| mmu-miR-3079-3p   | 1.89251  |    | 0.577542  | 0.534191 | 1.08115 NA   |
| mmu-miR-3080-5p   | NA       | NA | NA        | NA       | NA           |
| mmu-miR-3081-5p   | 0.401856 |    | -0.579842 | 0.444424 | -1.3047 NA   |
| mmu-miR-3082-3p   | 0.500487 |    | 0.518379  | 0.452694 | 1.1451 NA    |
| mmu-miR-3084-5p   | NA       | NA | NA        | NA       | NA           |
| mmu-miR-3086-3p   | NA       | NA | NA        | NA       | NA           |
| mmu-miR-466m-5p   | NA       | NA | NA        | NA       | NA           |
| mmu-miR-669d-2-3p | NA       | NA | NA        | NA       | NA           |
| mmu-miR-466o-5p   | NA       | NA | NA        | NA       | NA           |
| mmu-miR-466o-3p   | NA       | NA | NA        | NA       | NA           |
| mmu-miR-669p-5p   | NA       | NA | NA        | NA       | NA           |
| mmu-miR-466p-3p   | NA       | NA | NA        | NA       | NA           |
| mmu-miR-466n-5p   | NA       | NA | NA        | NA       | NA           |
| mmu-miR-3087-5p   | 0.344448 |    | -0.561559 | 0.440516 | -1.27478 NA  |
| mmu-miR-3087-3p   | 0.581887 |    | -0.621741 | 0.452778 | -1.37317 NA  |
| mmu-miR-3088-5p   | NA       | NA | NA        | NA       | NA           |
| mmu-miR-3089-5p   | NA       | NA | NA        | NA       | NA           |
| mmu-miR-3089-3p   | 0.699842 |    | 0.0106096 | 0.451142 | 0.0235171 NA |
| mmu-miR-3091-3p   | NA       | NA | NA        | NA       | NA           |
| mmu-miR-3093-3p   | NA       | NA | NA        | NA       | NA           |
| mmu-miR-3095-5p   | NA       | NA | NA        | NA       | NA           |
| mmu-miR-3095-3p   | 0.631487 |    | -0.627448 | 0.453856 | -1.38248 NA  |
| mmu-miR-3100-3p   | 1.5401   |    | -0.269691 | 0.466447 | -0.578182 NA |
| mmu-miR-3101-5p   | NA       | NA | NA        | NA       | NA           |
| mmu-miR-3101-3p   | NA       | NA | NA        | NA       | NA           |
| mmu-miR-344e-5p   | NA       | NA | NA        | NA       | NA           |
| mmu-miR-344e-3p   | 1.88851  |    | -0.309921 | 0.502553 | -0.616693 NA |
| mmu-miR-344c-5p   | NA       | NA | NA        | NA       | NA           |
| mmu-miR-344c-3p   | NA       | NA | NA        | NA       | NA           |
| mmu-miR-344g-3p   | NA       | NA | NA        | NA       | NA           |

|                  |          |            |          |           |    |
|------------------|----------|------------|----------|-----------|----|
| mmu-miR-3103-5p  | NA       | NA         | NA       | NA        | NA |
| mmu-miR-486b-5p  | NA       | NA         | NA       | NA        | NA |
| mmu-miR-3108-5p  | NA       | NA         | NA       | NA        | NA |
| mmu-miR-3108-3p  | 0.24938  | -0.526213  | 0.432459 | -1.21679  | NA |
| mmu-miR-3109-5p  | NA       | NA         | NA       | NA        | NA |
| mmu-miR-3109-3p  | NA       | NA         | NA       | NA        | NA |
| mmu-miR-3110-5p  | 2.57913  | 0.355641   | 0.562266 | 0.632514  | NA |
| mmu-miR-374c-3p  | NA       | NA         | NA       | NA        | NA |
| mmu-miR-3112-5p  | 1.43678  | 0.00628769 | 0.462675 | 0.0135899 | NA |
| mmu-miR-3113-3p  | 0.718392 | 0.0104037  | 0.451762 | 0.0230291 | NA |
| mmu-miR-3470b    | 4.6176   | -2.14074   | 0.73878  | -2.89766  | NA |
| mmu-miR-3473a    | NA       | NA         | NA       | NA        | NA |
| mmu-miR-3961     | NA       | NA         | NA       | NA        | NA |
| mmu-miR-3963     | NA       | NA         | NA       | NA        | NA |
| mmu-miR-3965     | NA       | NA         | NA       | NA        | NA |
| mmu-miR-101c     | NA       | NA         | NA       | NA        | NA |
| mmu-miR-28b      | NA       | NA         | NA       | NA        | NA |
| mmu-miR-5098     | NA       | NA         | NA       | NA        | NA |
| mmu-miR-5099     | 4.46215  | 1.20505    | 0.741091 | 1.62604   | NA |
| mmu-miR-5103     | 1.09102  | 0.00767836 | 0.459264 | 0.0167188 | NA |
| mmu-miR-3473c    | 3.27854  | 1.00764    | 0.68306  | 1.47518   | NA |
| mmu-miR-5108     | NA       | NA         | NA       | NA        | NA |
| mmu-miR-5112     | NA       | NA         | NA       | NA        | NA |
| mmu-miR-5118     | NA       | NA         | NA       | NA        | NA |
| mmu-miR-5119     | NA       | NA         | NA       | NA        | NA |
| mmu-miR-3572-3p  | 1.49933  | -0.395163  | 0.595708 | -0.663349 | NA |
| mmu-miR-5127     | NA       | NA         | NA       | NA        | NA |
| mmu-miR-5129-3p  | 4.78308  | 0.142105   | 0.60403  | 0.235262  | NA |
| mmu-miR-5131     | NA       | NA         | NA       | NA        | NA |
| mmu-miR-5132-3p  | 0.581887 | -0.621741  | 0.452778 | -1.37317  | NA |
| mmu-miR-5133     | NA       | NA         | NA       | NA        | NA |
| mmu-miR-5136     | NA       | NA         | NA       | NA        | NA |
| mmu-miR-3544-3p  | NA       | NA         | NA       | NA        | NA |
| mmu-miR-299b-5p  | NA       | NA         | NA       | NA        | NA |
| mmu-miR-299b-3p  | NA       | NA         | NA       | NA        | NA |
| mmu-miR-5615-3p  | 1.15893  | 0.545045   | 0.467294 | 1.16639   | NA |
| mmu-miR-5618-5p  | NA       | NA         | NA       | NA        | NA |
| mmu-miR-5618-3p  | NA       | NA         | NA       | NA        | NA |
| mmu-miR-5619-3p  | 0.337228 | -0.380227  | 0.443874 | -0.856609 | NA |
| mmu-miR-3073b-3p | NA       | NA         | NA       | NA        | NA |
| mmu-miR-5624-5p  | NA       | NA         | NA       | NA        | NA |
| mmu-miR-5624-3p  | NA       | NA         | NA       | NA        | NA |
| mmu-miR-5625-5p  | NA       | NA         | NA       | NA        | NA |
| mmu-miR-344h-5p  | NA       | NA         | NA       | NA        | NA |
| mmu-miR-344h-3p  | NA       | NA         | NA       | NA        | NA |
| mmu-miR-5627-5p  | 2.11617  | -0.0927868 | 0.494087 | -0.187795 | NA |
| mmu-miR-344i     | NA       | NA         | NA       | NA        | NA |
| mmu-miR-5709-5p  | 0.974667 | 0.524529   | 0.463071 | 1.13272   | NA |

|                 |          |    |            |          |              |
|-----------------|----------|----|------------|----------|--------------|
| mmu-miR-6236    | NA       | NA | NA         | NA       | NA           |
| mmu-miR-6241    | NA       | NA | NA         | NA       | NA           |
| mmu-miR-133c    | NA       | NA | NA         | NA       | NA           |
| mmu-miR-6338    | 0.574079 |    | -0.618179  | 0.452099 | -1.36735 NA  |
| mmu-miR-6341    | NA       | NA | NA         | NA       | NA           |
| mmu-miR-6345    | NA       | NA | NA         | NA       | NA           |
| mmu-miR-6347    | NA       | NA | NA         | NA       | NA           |
| mmu-miR-6348    | NA       | NA | NA         | NA       | NA           |
| mmu-miR-6350    | NA       | NA | NA         | NA       | NA           |
| mmu-miR-6351    | NA       | NA | NA         | NA       | NA           |
| mmu-miR-6353    | NA       | NA | NA         | NA       | NA           |
| mmu-miR-6354    | NA       | NA | NA         | NA       | NA           |
| mmu-miR-6358    | NA       | NA | NA         | NA       | NA           |
| mmu-miR-6359    | NA       | NA | NA         | NA       | NA           |
| mmu-miR-6360    | NA       | NA | NA         | NA       | NA           |
| mmu-miR-6362    | NA       | NA | NA         | NA       | NA           |
| mmu-miR-6363    | NA       | NA | NA         | NA       | NA           |
| mmu-miR-6367    | 0.207817 |    | -0.502369  | 0.426643 | -1.17749 NA  |
| mmu-miR-6368    | NA       | NA | NA         | NA       | NA           |
| mmu-miR-6374    | 7.829    |    | 0.0144621  | 0.473117 | 0.0305676 NA |
| mmu-miR-6376    | NA       | NA | NA         | NA       | NA           |
| mmu-miR-6384    | 1.43048  |    | -0.0978642 | 0.538662 | -0.18168 NA  |
| mmu-miR-130c    | NA       | NA | NA         | NA       | NA           |
| mmu-miR-6388    | 0.604677 |    | 0.526439   | 0.455288 | 1.15628 NA   |
| mmu-miR-6391    | 0.852845 |    | 0.100034   | 0.456467 | 0.219149 NA  |
| mmu-miR-6394    | NA       | NA | NA         | NA       | NA           |
| mmu-miR-6397    | NA       | NA | NA         | NA       | NA           |
| mmu-miR-6400    | NA       | NA | NA         | NA       | NA           |
| mmu-miR-496b    | NA       | NA | NA         | NA       | NA           |
| mmu-miR-6407    | NA       | NA | NA         | NA       | NA           |
| mmu-miR-6409    | NA       | NA | NA         | NA       | NA           |
| mmu-miR-6410    | 0.614983 |    | 0.0120507  | 0.44655  | 0.0269863 NA |
| mmu-miR-6411    | NA       | NA | NA         | NA       | NA           |
| mmu-miR-6413    | NA       | NA | NA         | NA       | NA           |
| mmu-miR-6416-5p | NA       | NA | NA         | NA       | NA           |
| mmu-miR-873b    | NA       | NA | NA         | NA       | NA           |
| mmu-miR-451b    | NA       | NA | NA         | NA       | NA           |
| mmu-miR-6481    | NA       | NA | NA         | NA       | NA           |
| mmu-let-7k      | NA       | NA | NA         | NA       | NA           |
| mmu-miR-6537-5p | NA       | NA | NA         | NA       | NA           |
| mmu-miR-6538    | NA       | NA | NA         | NA       | NA           |
| mmu-miR-6539    | NA       | NA | NA         | NA       | NA           |
| mmu-miR-6896-3p | NA       | NA | NA         | NA       | NA           |
| mmu-miR-6898-5p | 0.956939 |    | 0.582156   | 0.462096 | 1.25982 NA   |
| mmu-miR-6900-5p | NA       | NA | NA         | NA       | NA           |
| mmu-miR-6904-5p | 2.00701  |    | 0.082201   | 0.57133  | 0.143877 NA  |
| mmu-miR-6904-3p | NA       | NA | NA         | NA       | NA           |
| mmu-miR-6905-5p | NA       | NA | NA         | NA       | NA           |

|                 |          |    |            |          |               |
|-----------------|----------|----|------------|----------|---------------|
| mmu-miR-6905-3p | NA       | NA | NA         | NA       | NA            |
| mmu-miR-6907-5p | 1.14892  |    | -0.0965815 | 0.483238 | -0.199863 NA  |
| mmu-miR-6908-5p | 0.661993 |    | -0.102539  | 0.452815 | -0.226448 NA  |
| mmu-miR-6909-3p | 1.31235  |    | -0.768684  | 0.48653  | -1.57993 NA   |
| mmu-miR-6912-5p | 0.297327 |    | -0.545706  | 0.436987 | -1.24879 NA   |
| mmu-miR-6912-3p | NA       | NA | NA         | NA       | NA            |
| mmu-miR-6913-5p | 0.207817 |    | -0.502369  | 0.426643 | -1.17749 NA   |
| mmu-miR-6913-3p | 0.853827 |    | -0.310615  | 0.461394 | -0.67321 NA   |
| mmu-miR-6914-3p | NA       | NA | NA         | NA       | NA            |
| mmu-miR-6915-5p | 1.31627  |    | -0.0387432 | 0.462548 | -0.0837603 NA |
| mmu-miR-6916-3p | 0.514927 |    | -0.487568  | 0.451904 | -1.07892 NA   |
| mmu-miR-6917-3p | 0.508203 |    | -0.348903  | 0.453379 | -0.769563 NA  |
| mmu-miR-6918-5p | NA       | NA | NA         | NA       | NA            |
| mmu-miR-6921-5p | 0.955609 |    | -0.383224  | 0.461929 | -0.829616 NA  |
| mmu-miR-6921-3p | 1.66782  |    | 0.156882   | 0.467139 | 0.335836 NA   |
| mmu-miR-6922-3p | 0.415634 |    | -0.587104  | 0.445931 | -1.31658 NA   |
| mmu-miR-6924-5p | 0.888711 |    | -0.563632  | 0.46032  | -1.22443 NA   |
| mmu-miR-6924-3p | NA       | NA | NA         | NA       | NA            |
| mmu-miR-6925-3p | NA       | NA | NA         | NA       | NA            |
| mmu-miR-6927-3p | NA       | NA | NA         | NA       | NA            |
| mmu-miR-6928-3p | 1.49362  |    | -0.527803  | 0.561719 | -0.93962 NA   |
| mmu-miR-6929-5p | NA       | NA | NA         | NA       | NA            |
| mmu-miR-6930-3p | NA       | NA | NA         | NA       | NA            |
| mmu-miR-6931-3p | NA       | NA | NA         | NA       | NA            |
| mmu-miR-6932-5p | NA       | NA | NA         | NA       | NA            |
| mmu-miR-6932-3p | 1.69151  |    | -0.222557  | 0.552462 | -0.402845 NA  |
| mmu-miR-6935-3p | 0.636029 |    | 0.393871   | 0.457761 | 0.860429 NA   |
| mmu-miR-6936-5p | 0.570233 |    | 0.424877   | 0.455125 | 0.93354 NA    |
| mmu-miR-6936-3p | NA       | NA | NA         | NA       | NA            |
| mmu-miR-6937-3p | NA       | NA | NA         | NA       | NA            |
| mmu-miR-6939-3p | NA       | NA | NA         | NA       | NA            |
| mmu-miR-6941-5p | NA       | NA | NA         | NA       | NA            |
| mmu-miR-6942-3p | 0.75713  |    | -0.394948  | 0.458815 | -0.8608 NA    |
| mmu-miR-6944-3p | 2.4381   |    | -0.289914  | 0.5666   | -0.511674 NA  |
| mmu-miR-6945-3p | 2.06917  |    | 0.0934412  | 0.542067 | 0.172379 NA   |
| mmu-miR-6947-5p | 0.461396 |    | 0.342114   | 0.452565 | 0.755945 NA   |
| mmu-miR-6949-5p | 0.207817 |    | -0.502369  | 0.426643 | -1.17749 NA   |
| mmu-miR-6950-5p | NA       | NA | NA         | NA       | NA            |
| mmu-miR-6951-5p | NA       | NA | NA         | NA       | NA            |
| mmu-miR-6951-3p | NA       | NA | NA         | NA       | NA            |
| mmu-miR-6954-5p | 0.669542 |    | 0.646202   | 0.455172 | 1.41969 NA    |
| mmu-miR-6956-5p | NA       | NA | NA         | NA       | NA            |
| mmu-miR-6956-3p | 1.62047  |    | 0.706127   | 0.46664  | 1.51322 NA    |
| mmu-miR-6958-5p | 0.587471 |    | 0.0116223  | 0.447965 | 0.0259446 NA  |
| mmu-miR-6959-5p | NA       | NA | NA         | NA       | NA            |
| mmu-miR-6962-5p | NA       | NA | NA         | NA       | NA            |
| mmu-miR-6962-3p | 1.58576  |    | -0.0626874 | 0.565555 | -0.110842 NA  |
| mmu-miR-6963-3p | 1.11892  |    | 0.111813   | 0.465411 | 0.240246 NA   |

|                  |          |    |            |          |            |    |
|------------------|----------|----|------------|----------|------------|----|
| mmu-miR-6965-5p  | 0.401856 |    | -0.579842  | 0.444424 | -1.3047    | NA |
| mmu-miR-6966-5p  | NA       | NA | NA         | NA       |            | NA |
| mmu-miR-6968-3p  | 3.13868  |    | 0.0484372  | 0.59133  | 0.0819124  | NA |
| mmu-miR-6969-5p  | 1.11842  |    | -0.0386319 | 0.491417 | -0.0786133 | NA |
| mmu-miR-6969-3p  | 1.58869  |    | 0.00579348 | 0.463831 | 0.0124905  | NA |
| mmu-miR-6970-5p  | 3.00215  |    | 0.00222645 | 0.531669 | 0.00418767 | NA |
| mmu-miR-6971-3p  | 1.62138  |    | 0.00646229 | 0.475695 | 0.0135849  | NA |
| mmu-miR-6973a-3p | NA       | NA | NA         | NA       |            | NA |
| mmu-miR-6977-5p  | NA       | NA | NA         | NA       |            | NA |
| mmu-miR-6978-3p  | 1.03747  |    | -0.0453075 | 0.501157 | -0.0904057 | NA |
| mmu-miR-6979-5p  | NA       | NA | NA         | NA       |            | NA |
| mmu-miR-6981-3p  | NA       | NA | NA         | NA       |            | NA |
| mmu-miR-6982-3p  | 2.32526  |    | -0.262023  | 0.586007 | -0.447133  | NA |
| mmu-miR-6983-3p  | NA       | NA | NA         | NA       |            | NA |
| mmu-miR-6986-3p  | NA       | NA | NA         | NA       |            | NA |
| mmu-miR-6989-3p  | 1.89047  |    | -0.56334   | 0.477977 | -1.17859   | NA |
| mmu-miR-6990-5p  | 0.37407  |    | -0.575318  | 0.443473 | -1.2973    | NA |
| mmu-miR-6994-3p  | NA       | NA | NA         | NA       |            | NA |
| mmu-miR-6996-5p  | 1.90305  |    | 0.00684264 | 0.494962 | 0.0138246  | NA |
| mmu-miR-6997-5p  | NA       | NA | NA         | NA       |            | NA |
| mmu-miR-6997-3p  | 2.39034  |    | -0.218026  | 0.559288 | -0.389828  | NA |
| mmu-miR-6998-5p  | 0.641807 |    | -0.414383  | 0.456724 | -0.907293  | NA |
| mmu-miR-6998-3p  | NA       | NA | NA         | NA       |            | NA |
| mmu-miR-6999-3p  | 0.527816 |    | -0.443177  | 0.452081 | -0.980305  | NA |
| mmu-miR-7000-3p  | 1.53909  |    | -0.398156  | 0.513643 | -0.775161  | NA |
| mmu-miR-7001-5p  | NA       | NA | NA         | NA       |            | NA |
| mmu-miR-7002-5p  | NA       | NA | NA         | NA       |            | NA |
| mmu-miR-7002-3p  | NA       | NA | NA         | NA       |            | NA |
| mmu-miR-6973b-5p | NA       | NA | NA         | NA       |            | NA |
| mmu-miR-7003-3p  | NA       | NA | NA         | NA       |            | NA |
| mmu-miR-7004-5p  | NA       | NA | NA         | NA       |            | NA |
| mmu-miR-7004-3p  | NA       | NA | NA         | NA       |            | NA |
| mmu-miR-7006-5p  | NA       | NA | NA         | NA       |            | NA |
| mmu-miR-7007-3p  | NA       | NA | NA         | NA       |            | NA |
| mmu-miR-7009-5p  | NA       | NA | NA         | NA       |            | NA |
| mmu-miR-7014-5p  | 1.59177  |    | 0.400857   | 0.570584 | 0.702539   | NA |
| mmu-miR-7014-3p  | NA       | NA | NA         | NA       |            | NA |
| mmu-miR-7016-5p  | 0.852396 |    | -0.329252  | 0.475279 | -0.692755  | NA |
| mmu-miR-7018-5p  | 1.09863  |    | -0.32315   | 0.463411 | -0.697329  | NA |
| mmu-miR-7018-3p  | 1.05895  |    | 0.592648   | 0.463212 | 1.27943    | NA |
| mmu-miR-7019-5p  | 1.26776  |    | -0.377419  | 0.464959 | -0.811726  | NA |
| mmu-miR-7019-3p  | 0.624441 |    | -0.430268  | 0.456169 | -0.943221  | NA |
| mmu-miR-7022-3p  | 0.615643 |    | -0.625162  | 0.453426 | -1.37875   | NA |
| mmu-miR-7023-3p  | 3.04553  |    | 0.509117   | 0.574538 | 0.886134   | NA |
| mmu-miR-7024-3p  | 0.427686 |    | 0.422396   | 0.450324 | 0.937983   | NA |
| mmu-miR-7026-5p  | NA       | NA | NA         | NA       |            | NA |
| mmu-miR-7027-3p  | 1.94986  |    | -0.0484596 | 0.623598 | -0.0777097 | NA |
| mmu-miR-7029-3p  | 5.53346  |    | 1.53053    | 0.679652 | 2.25193    | NA |

|                  |          |    |            |          |           |    |
|------------------|----------|----|------------|----------|-----------|----|
| mmu-miR-7030-3p  | 0.922474 |    | 0.00912882 | 0.455422 | 0.0200447 | NA |
| mmu-miR-7032-3p  | NA       | NA | NA         | NA       |           | NA |
| mmu-miR-7033-3p  | 1.66451  |    | -0.515306  | 0.467313 | -1.1027   | NA |
| mmu-miR-7035-5p  | 0.207817 |    | -0.502369  | 0.426643 | -1.17749  | NA |
| mmu-miR-7035-3p  | NA       | NA | NA         | NA       |           | NA |
| mmu-miR-7036a-3p | 1.32737  |    | 0.00518494 | 0.486242 | 0.0106633 | NA |
| mmu-miR-7039-3p  | NA       | NA | NA         | NA       |           | NA |
| mmu-miR-7041-5p  | 0.61238  |    | 0.413612   | 0.45714  | 0.904782  | NA |
| mmu-miR-7043-3p  | 2.45917  |    | 0.618436   | 0.627673 | 0.985283  | NA |
| mmu-miR-7044-5p  | NA       | NA | NA         | NA       |           | NA |
| mmu-miR-7049-5p  | 1.82555  |    | -0.333987  | 0.569064 | -0.586907 | NA |
| mmu-miR-7051-3p  | NA       | NA | NA         | NA       |           | NA |
| mmu-miR-7054-3p  | NA       | NA | NA         | NA       |           | NA |
| mmu-miR-7055-5p  | 4.25908  |    | 0.0210538  | 0.62176  | 0.0338616 | NA |
| mmu-miR-7056-3p  | NA       | NA | NA         | NA       |           | NA |
| mmu-miR-7057-5p  | NA       | NA | NA         | NA       |           | NA |
| mmu-miR-7057-3p  | 1.80058  |    | 0.0369315  | 0.669628 | 0.0551522 | NA |
| mmu-miR-7059-5p  | NA       | NA | NA         | NA       |           | NA |
| mmu-miR-7060-3p  | 2.68599  |    | -0.439205  | 0.582294 | -0.754267 | NA |
| mmu-miR-7064-5p  | NA       | NA | NA         | NA       |           | NA |
| mmu-miR-7064-3p  | NA       | NA | NA         | NA       |           | NA |
| mmu-miR-7065-5p  | NA       | NA | NA         | NA       |           | NA |
| mmu-miR-7068-3p  | 1.42582  |    | 0.253837   | 0.504158 | 0.503486  | NA |
| mmu-miR-7073-5p  | 4.02221  |    | 0.534586   | 0.548354 | 0.974894  | NA |
| mmu-miR-7077-5p  | NA       | NA | NA         | NA       |           | NA |
| mmu-miR-7078-5p  | NA       | NA | NA         | NA       |           | NA |
| mmu-miR-7082-3p  | 1.25203  |    | -0.0994428 | 0.466386 | -0.21322  | NA |
| mmu-miR-7083-5p  | NA       | NA | NA         | NA       |           | NA |
| mmu-miR-7085-3p  | 1.0094   |    | 0.68075    | 0.46201  | 1.47345   | NA |
| mmu-miR-7087-3p  | NA       | NA | NA         | NA       |           | NA |
| mmu-miR-7089-3p  | 1.34845  |    | -0.159963  | 0.473397 | -0.337904 | NA |
| mmu-miR-7090-5p  | 0.599865 |    | 0.0116883  | 0.44775  | 0.0261046 | NA |
| mmu-miR-7091-5p  | 1.31508  |    | -0.296497  | 0.466315 | -0.63583  | NA |
| mmu-miR-7210-5p  | NA       | NA | NA         | NA       |           | NA |
| mmu-miR-7210-3p  | NA       | NA | NA         | NA       |           | NA |
| mmu-miR-7211-5p  | 0.378792 |    | -0.406921  | 0.446419 | -0.911522 | NA |
| mmu-miR-7211-3p  | 0.748141 |    | -0.644479  | 0.45699  | -1.41027  | NA |
| mmu-miR-7214-3p  | NA       | NA | NA         | NA       |           | NA |
| mmu-miR-7215-5p  | NA       | NA | NA         | NA       |           | NA |
| mmu-miR-7216-5p  | 0.925283 |    | 0.674878   | 0.460892 | 1.46429   | NA |
| mmu-miR-7218-5p  | 0.674057 |    | -0.529911  | 0.456248 | -1.16145  | NA |
| mmu-miR-7219-3p  | NA       | NA | NA         | NA       |           | NA |
| mmu-miR-7220-5p  | NA       | NA | NA         | NA       |           | NA |
| mmu-miR-7221-5p  | NA       | NA | NA         | NA       |           | NA |
| mmu-miR-7222-3p  | NA       | NA | NA         | NA       |           | NA |
| mmu-miR-7223-3p  | NA       | NA | NA         | NA       |           | NA |
| mmu-miR-7224-5p  | 5.06149  |    | -0.137348  | 0.565355 | -0.242941 | NA |
| mmu-miR-7225-5p  | NA       | NA | NA         | NA       |           | NA |

|                 |          |    |           |          |           |    |
|-----------------|----------|----|-----------|----------|-----------|----|
| mmu-miR-7227-3p | NA       | NA | NA        | NA       | NA        | NA |
| mmu-miR-7228-5p | NA       | NA | NA        | NA       | NA        | NA |
| mmu-miR-7228-3p | NA       | NA | NA        | NA       | NA        | NA |
| mmu-miR-7229-3p | NA       | NA | NA        | NA       | NA        | NA |
| mmu-miR-7231-5p | 3.02495  |    | -0.360476 | 0.519053 | -0.694489 | NA |
| mmu-miR-7233-5p | NA       | NA | NA        | NA       | NA        | NA |
| mmu-miR-7235-5p | NA       | NA | NA        | NA       | NA        | NA |
| mmu-miR-7236-3p | 0.73845  |    | -0.641813 | 0.456507 | -1.40592  | NA |
| mmu-miR-7238-5p | NA       | NA | NA        | NA       | NA        | NA |
| mmu-miR-7238-3p | NA       | NA | NA        | NA       | NA        | NA |
| mmu-miR-7239-5p | NA       | NA | NA        | NA       | NA        | NA |
| mmu-miR-7239-3p | NA       | NA | NA        | NA       | NA        | NA |
| mmu-miR-7240-5p | NA       | NA | NA        | NA       | NA        | NA |
| mmu-miR-7240-3p | NA       | NA | NA        | NA       | NA        | NA |
| mmu-miR-7241-5p | NA       | NA | NA        | NA       | NA        | NA |
| mmu-miR-7242-5p | 0.498606 |    | 0.616186  | 0.448702 | 1.37326   | NA |
| mmu-miR-7242-3p | NA       | NA | NA        | NA       | NA        | NA |
| mmu-miR-6546-5p | 0.37407  |    | -0.575318 | 0.443473 | -1.2973   | NA |
| mmu-miR-7646-5p | 4.22167  |    | 0.1837    | 0.59216  | 0.31022   | NA |
| mmu-miR-7646-3p | NA       | NA | NA        | NA       | NA        | NA |
| mmu-miR-7648-5p | NA       | NA | NA        | NA       | NA        | NA |
| mmu-miR-7648-3p | NA       | NA | NA        | NA       | NA        | NA |
| mmu-miR-7649-5p | NA       | NA | NA        | NA       | NA        | NA |
| mmu-miR-7649-3p | 1.20698  |    | 0.0734859 | 0.47162  | 0.155816  | NA |
| mmu-miR-7650-3p | NA       | NA | NA        | NA       | NA        | NA |
| mmu-miR-7651-5p | 0.415634 |    | -0.587104 | 0.445931 | -1.31658  | NA |
| mmu-miR-219b-3p | NA       | NA | NA        | NA       | NA        | NA |
| mmu-miR-7652-5p | 1.02133  |    | 0.0391302 | 0.479343 | 0.0816331 | NA |
| mmu-miR-7654-3p | 0.24938  |    | -0.526213 | 0.432459 | -1.21679  | NA |
| mmu-miR-7655-3p | 0.459264 |    | -0.594858 | 0.447512 | -1.32926  | NA |
| mmu-miR-7656-5p | NA       | NA | NA        | NA       | NA        | NA |
| mmu-miR-7656-3p | 0.757049 |    | 0.660037  | 0.457986 | 1.44117   | NA |
| mmu-miR-7657-5p | NA       | NA | NA        | NA       | NA        | NA |
| mmu-miR-7657-3p | NA       | NA | NA        | NA       | NA        | NA |
| mmu-miR-7659-3p | NA       | NA | NA        | NA       | NA        | NA |
| mmu-miR-7660-5p | 1.08177  |    | -0.370311 | 0.463399 | -0.799118 | NA |
| mmu-miR-7660-3p | NA       | NA | NA        | NA       | NA        | NA |
| mmu-miR-7661-3p | 1.07479  |    | 0.141985  | 0.464964 | 0.305367  | NA |
| mmu-miR-7662-5p | NA       | NA | NA        | NA       | NA        | NA |
| mmu-miR-7663-5p | NA       | NA | NA        | NA       | NA        | NA |
| mmu-miR-7663-3p | NA       | NA | NA        | NA       | NA        | NA |
| mmu-miR-7664-5p | NA       | NA | NA        | NA       | NA        | NA |
| mmu-miR-7664-3p | NA       | NA | NA        | NA       | NA        | NA |
| mmu-miR-7666-5p | NA       | NA | NA        | NA       | NA        | NA |
| mmu-miR-7666-3p | NA       | NA | NA        | NA       | NA        | NA |
| mmu-miR-7668-5p | NA       | NA | NA        | NA       | NA        | NA |
| mmu-miR-7668-3p | 0.462655 |    | -0.449446 | 0.449436 | -1.00002  | NA |
| mmu-miR-7669-5p | 1.3907   |    | -0.176233 | 0.464794 | -0.379163 | NA |

|                  |          |    |            |          |            |    |
|------------------|----------|----|------------|----------|------------|----|
| mmu-miR-7670-5p  | 0.390237 |    | -0.4344    | 0.446026 | -0.973934  | NA |
| mmu-miR-7671-5p  | NA       | NA | NA         | NA       | NA         | NA |
| mmu-miR-7671-3p  | NA       | NA | NA         | NA       | NA         | NA |
| mmu-miR-7672-3p  | 0.332507 |    | -0.561644  | 0.440535 | -1.27491   | NA |
| mmu-miR-7673-5p  | 0.4318   |    | -0.454654  | 0.448321 | -1.01413   | NA |
| mmu-miR-7673-3p  | NA       | NA | NA         | NA       | NA         | NA |
| mmu-miR-3569-5p  | 0.997212 |    | 0.677488   | 0.461391 | 1.46836    | NA |
| mmu-miR-292b-5p  | NA       | NA | NA         | NA       | NA         | NA |
| mmu-miR-1191b-5p | 0.802016 |    | -0.108855  | 0.456749 | -0.238325  | NA |
| mmu-miR-7678-5p  | NA       | NA | NA         | NA       | NA         | NA |
| mmu-miR-7679-5p  | 0.344448 |    | -0.561559  | 0.440516 | -1.27478   | NA |
| mmu-miR-7680-5p  | NA       | NA | NA         | NA       | NA         | NA |
| mmu-miR-7680-3p  | 1.13812  |    | 0.102246   | 0.474721 | 0.215381   | NA |
| mmu-miR-6715-5p  | NA       | NA | NA         | NA       | NA         | NA |
| mmu-miR-465d-5p  | NA       | NA | NA         | NA       | NA         | NA |
| mmu-miR-7682-5p  | NA       | NA | NA         | NA       | NA         | NA |
| mmu-miR-216c-5p  | NA       | NA | NA         | NA       | NA         | NA |
| mmu-miR-219c-5p  | 1.1136   |    | -0.187409  | 0.465152 | -0.402898  | NA |
| mmu-miR-219c-3p  | NA       | NA | NA         | NA       | NA         | NA |
| mmu-miR-7685-3p  | NA       | NA | NA         | NA       | NA         | NA |
| mmu-miR-7686-3p  | NA       | NA | NA         | NA       | NA         | NA |
| mmu-miR-290b-5p  | NA       | NA | NA         | NA       | NA         | NA |
| mmu-miR-290b-3p  | NA       | NA | NA         | NA       | NA         | NA |
| mmu-miR-7688-3p  | NA       | NA | NA         | NA       | NA         | NA |
| mmu-miR-7689-5p  | NA       | NA | NA         | NA       | NA         | NA |
| mmu-miR-7689-3p  | NA       | NA | NA         | NA       | NA         | NA |
| mmu-miR-7243-5p  | NA       | NA | NA         | NA       | NA         | NA |
| mmu-miR-3473f    | NA       | NA | NA         | NA       | NA         | NA |
| mmu-miR-8091     | 2.43824  |    | -0.0684197 | 0.571615 | -0.119695  | NA |
| mmu-miR-8092     | 0.672933 |    | 0.650451   | 0.456047 | 1.42628    | NA |
| mmu-miR-8094     | NA       | NA | NA         | NA       | NA         | NA |
| mmu-miR-1291     | 0.37407  |    | -0.575318  | 0.443473 | -1.2973    | NA |
| mmu-miR-8096     | NA       | NA | NA         | NA       | NA         | NA |
| mmu-miR-8098     | NA       | NA | NA         | NA       | NA         | NA |
| mmu-miR-8100     | 0.875305 |    | 0.363605   | 0.46256  | 0.786071   | NA |
| mmu-miR-497b     | 2.44156  |    | -0.0498025 | 0.628922 | -0.0791871 | NA |
| mmu-miR-8107     | 3.79147  |    | -0.100294  | 0.5672   | -0.176823  | NA |
| mmu-miR-8108     | 0.277709 |    | 0.568675   | 0.43738  | 1.30019    | NA |
| mmu-miR-8111     | NA       | NA | NA         | NA       | NA         | NA |
| mmu-miR-8115     | NA       | NA | NA         | NA       | NA         | NA |
| mmu-miR-8117     | 1.57259  |    | -0.0275006 | 0.492301 | -0.0558614 | NA |
| mmu-miR-8120     | 0.335698 |    | 0.0155925  | 0.432638 | 0.0360407  | NA |
| mmu-miR-3552     | NA       | NA | NA         | NA       | NA         | NA |
| mmu-miR-3618-3p  | NA       | NA | NA         | NA       | NA         | NA |
| mmu-miR-9768-3p  | 0.898574 |    | 0.555312   | 0.461382 | 1.20358    | NA |
